# Supplementary material for: Transcriptome analyses of Anguillicola crassus from native and novel hosts
Source: PeerJ. 2014 Nov 27;2:e684. doi: 10.7717/peerj.684 (PMC4250067; doi:10.7717/peerj.684)
Supplement: Data S1 [file peerj-02-684-s003.csv]

	logFC.sex.condsmale	logFC.sex.condsmale.eel.condsAJ	logFC.sex.condsmale.pop.condsTW	logCPM	LR	PValue	FDR
comp43250_c0_seq1	6.49711144541817	0.00177256558608158	0.712623300329909	10.3287661617573	1023.88356998544	1.18575950530525e-221	9.61176655000433e-218
comp58427_c1_seq1	7.13637191470162	-0.403639401012023	0.472187587983277	9.68729052249446	891.678892035145	5.64832034969181e-193	2.28926423773009e-189
comp53921_c3_seq1	6.88079439284108	-0.607297477228989	1.14883481288846	8.50469076078539	877.777177958407	5.85104938239745e-190	1.58095354312379e-186
comp35713_c0_seq1	7.08983332935576	-0.124676572802936	0.621891842470906	10.1128521167522	827.895897496486	3.85604078963665e-179	7.81426666019868e-176
comp17132_c0_seq1	7.46062049281758	-0.41206078829213	0.811093148562202	8.05627184123241	817.763784971096	6.07623338737332e-177	9.85078956760962e-174
comp35708_c0_seq2	7.49863084246503	-0.392522528271566	0.475457210900358	9.21714829343798	800.771057636333	2.9444879336372e-173	3.97800319834386e-170
comp54273_c0_seq1	7.1682731805939	-0.157383939447395	0.438523485565543	10.0668966634466	787.21478813292	2.56459057296616e-170	2.96979588349481e-167
comp57684_c4_seq2	10.0710969363499	-1.22953349508104	1.31572678245898	7.61075016680489	786.76468558888	3.2109436840531e-170	3.2534886878668e-167
comp15756_c0_seq1	7.0757889105644	0.210454003959364	0.934955950368473	8.70094199542641	782.473669405852	2.73672063218218e-169	2.46487304938541e-166
comp54310_c0_seq1	7.54661342178848	-0.1265020940652	0.990052462791291	9.34324519693837	781.994818560262	3.4759939867876e-169	2.81764072569003e-166
comp61896_c0_seq1	7.58840573138144	-0.501952312689546	1.90463025757369	9.0829110767471	773.317412002927	2.64811641620671e-167	1.95142106088832e-164
comp54031_c0_seq1	7.52164785545098	0.0936296565051089	0.386785937145954	7.72288296595975	755.341768466944	2.09509943862462e-163	1.41523967079093e-160
comp50312_c0_seq1	7.64850055453052	-0.466926628834305	0.672871111688516	9.23342839617952	754.534111283941	3.13583693595637e-163	1.95531493868171e-160
comp58828_c0_seq1	7.28966581168253	-0.0325047065444715	0.792676309920489	8.0928739220676	751.851531181367	1.19700782577774e-162	6.93067531125314e-160
comp45956_c0_seq1	7.82967817934613	-0.418002498146131	0.537409240442839	9.21454813958853	736.97835476672	2.01112537251738e-159	1.08681215130839e-156
comp15479_c0_seq1	7.15645541024975	0.255478019093939	0.427101366161411	7.84288236083653	726.257111884069	4.24965773159567e-157	2.15298284826966e-154
comp15292_c0_seq1	5.59397710755061	-0.312221469415378	0.323708974190207	9.6438366909397	718.489479859169	2.0546850551884e-155	9.7972217984454e-153
comp56622_c0_seq1	7.73491662066392	-0.574022338440502	0.932595733637937	9.78934084140961	714.557196330714	1.46366398056241e-154	6.59136679246606e-152
comp54454_c0_seq2	6.83729298309053	0.334267196417636	0.216192206037168	7.07101942130429	711.567240147513	6.5131958621873e-154	2.77873503467844e-151
comp56680_c0_seq1	6.3107859439989	-0.014389513266333	0.606039509490537	8.43070925344142	708.968741931696	2.38373874375142e-153	9.66129312842451e-151
comp62639_c0_seq1	6.53055526145887	0.0824558703103602	0.498628605834773	7.97217746341926	705.527583881329	1.32874934012854e-152	5.12897245289617e-150
comp58589_c0_seq1	7.71867887115248	-0.581430007017484	0.911394591587928	9.1080769472505	705.286374933293	1.49881101825997e-152	5.52243732455242e-150
comp35805_c0_seq1	7.03607202863314	0.396469144334747	0.56478734329632	8.21197560371432	694.204065336459	3.79149464560492e-150	1.3362545911858e-147
comp35777_c0_seq1	7.6550291268138	-0.32914798793875	0.137516946315001	7.66766191543709	691.976897969192	1.15275740920817e-149	3.89343814960061e-147
comp55747_c0_seq1	6.17923882227311	-0.00704654314982983	0.601329461355346	8.45909613749862	686.268294291693	1.99320435918998e-148	6.4627658142376e-146
comp62053_c0_seq1	7.74273543329788	-0.603912541454186	0.765424010116705	8.19282232522241	684.7203052016	4.31722266851335e-148	1.34597719042189e-145
comp45311_c0_seq1	6.31592094486132	-0.42223034082854	0.944822633291526	7.55518124966584	680.777612425767	3.09099991738099e-147	9.27986864084826e-145
comp45154_c0_seq1	7.56142310334435	-0.294794471822247	1.39753054287605	8.38500700633025	680.68234275012	3.24157623186709e-147	9.38436319125522e-145
comp59264_c0_seq1	-8.02898430815811	1.78789015244133	-1.46075115101708	7.0189994034311	670.527116213596	5.16037441836588e-145	1.44241362190600e-142
comp35803_c0_seq1	7.40770532392839	0.360121795421176	1.03743174845436	8.1349786133996	664.979167896759	8.23387198379044e-144	2.22479221002018e-141
comp54129_c0_seq1	7.5438560156732	0.408834600298591	0.749978282668777	7.70529649180386	663.403699373609	1.80800331301152e-143	4.72763705008755e-141
comp50390_c0_seq1	7.68366578770889	-0.773608879638598	0.504198996610166	8.20749275207147	652.239093291647	4.76308412783719e-141	1.20654874813276e-138
comp58026_c1_seq1	7.92986773885055	-0.838771022127377	0.317933640735275	7.05690544795572	649.056917022412	2.33254632353637e-140	5.72958196926843e-138
comp59308_c0_seq1	8.31235992782283	0.350663746943341	-0.600497841304786	6.9247532288264	645.344323456586	1.48856538087979e-139	3.54891499335634e-137
comp53968_c0_seq1	7.48519731753835	-0.313397739731522	0.925713708232401	7.92969024656569	644.348061223058	2.44776128451747e-139	5.66901513494247e-137
comp45746_c0_seq1	6.89293193248281	-0.103905696539217	0.272744317621398	7.76359913522611	629.960093174898	3.22246496340585e-136	7.25591694260218e-134
comp15619_c0_seq1	7.43904502391213	-0.712087253294663	1.2038960787645	7.78851499405443	629.551862891808	3.95088115583157e-136	8.65563314842452e-134
comp54607_c0_seq1	7.7570622555332	-0.459709924270926	0.316730235133007	7.08695979360708	628.189933149488	7.79766314744754e-136	1.66336467034762e-133
comp35708_c0_seq1	7.72236703283061	0.267097408094343	2.64518694547024	7.46709598436866	624.008568006349	6.28768498141208e-135	1.30687113998273e-132
comp51288_c0_seq1	6.96757727731573	0.398347418245497	0.331795008796252	7.14767470100385	621.889820144062	1.81065135882627e-134	3.66928497866145e-132
comp58351_c0_seq1	7.59151152475155	-0.981258394939551	0.328420585761123	7.32872187700651	621.360086185197	2.35874312482423e-134	4.66340774873785e-132
comp59738_c0_seq1	6.59549092419231	1.11449925847884	1.01110344136598	7.15146312196835	620.448631734591	3.71777179011406e-134	7.17529955492013e-132
comp50930_c1_seq1	6.64277854488638	-0.299972377442556	0.2738654266649	7.45134619261769	618.020337977402	1.24948550516989e-133	2.35542546625747e-131
comp35799_c0_seq1	6.59143408209253	-0.0618806860542411	0.755845265331495	7.98545888053769	610.693342882255	4.84380433226724e-132	8.92360861758143e-130
comp50752_c0_seq1	7.94813171555795	-1.14888277986917	1.02894451400972	6.85665933546694	610.189698375013	6.22835034017041e-132	1.1219335079427e-129
comp59430_c0_seq1	7.66595350157764	-0.0243999497331078	0.954217179804415	7.8112153511049	610.016001119501	6.79249445617295e-132	1.19695565351604e-129
comp60177_c0_seq1	6.14155025522273	-0.193313458422854	1.12623255001293	7.13484629478056	609.650526299359	8.15194853488785e-132	1.40595095369789e-129
comp56425_c0_seq1	7.97971826506052	-0.726623576591362	0.292444997230239	7.53090419966318	608.183234076435	1.69573639989035e-131	2.86367484531482e-129
comp44642_c0_seq1	6.82826667460732	-0.11336366779755	1.22167547531505	7.72913702452555	602.392691311869	3.05272851346918e-130	5.05008516942473e-128
comp56427_c0_seq1	7.22203088287636	0.718527233824995	0.456463933601871	7.1686973538871	596.034337407276	7.29609762209584e-129	1.18284334649418e-126
comp50861_c0_seq1	5.32983992783979	-0.250668328270842	0.492112173224759	8.12728050394077	592.393087090585	4.49212573087106e-128	7.13983748518448e-126
comp15526_c0_seq1	7.74981608264534	-0.342489577949205	0.886373454113592	8.25955790033627	586.889132992296	7.00809908844569e-127	1.09245483097963e-124
comp44569_c0_seq1	7.14267797722694	0.102055645605243	1.36371756788495	8.29286681535246	585.256231194151	1.58335171651284e-126	2.42163188944398e-124
comp53127_c0_seq1	6.73147474983237	1.17829128506705	-0.249420286886729	6.99180193349738	581.145106415652	1.23245562739544e-125	1.85005283623471e-123
comp54744_c0_seq1	6.55132758107948	-0.651500440883581	0.470621606117312	7.22850334248869	578.281161409915	5.14754272691024e-125	7.58654206260626e-123
comp50446_c0_seq1	8.08330965149761	0.0267427666593784	-0.156163702902812	7.16788890468631	577.825922330423	6.46075760057979e-125	9.35194662683924e-123
comp57917_c0_seq1	7.46723127662074	-0.0128026109344622	-0.984441918473985	6.99037197521793	573.926019530374	4.52554729156606e-124	6.43580462200605e-122
comp59329_c0_seq1	5.91893301233413	0.386840128968567	0.917960401948953	7.11425895749279	573.636169195648	5.23000368280917e-124	7.30938100911226e-122
comp56540_c0_seq1	7.61636215340451	-0.281726051209629	0.412820458842438	7.46957405838171	569.72903547968	3.67659997002031e-123	5.05127446728553e-121
comp35662_c0_seq1	6.90309926366318	-0.274879101053334	0.206099133364171	7.55941542148606	562.838483610137	1.14571791801016e-121	1.54786490723172e-119
comp57321_c0_seq3	5.97376326982885	0.420369570550133	0.614710136291178	7.61348110799702	560.796713642895	3.17435908228954e-121	4.21825487230147e-119
comp60261_c0_seq3	7.13738779960524	0.483981930904428	0.522344607400072	6.98227773700284	560.421707379315	3.82774403026975e-121	5.004466630543e-119
comp43792_c0_seq2	5.41186774612962	-0.167882708843071	0.730483726230484	6.82161716138722	559.54993525544	5.91437626971243e-121	7.60983080036332e-119
comp59351_c0_seq1	8.03446102210723	-0.91667615341259	0.411008621558594	7.97644814580613	559.267276336813	6.81048788387846e-121	8.62590856042481e-119
comp50910_c0_seq1	7.92416855707694	0.320566978671902	-0.221982645064896	7.64032017764752	558.732417800376	8.89435071339723e-121	1.10919395204304e-118
comp59707_c0_seq1	6.85899753669323	0.6779187956248	1.54134717612043	7.15135292921648	558.499631342959	9.99017324769785e-121	1.22697491433089e-118
comp35765_c0_seq1	7.76701949245813	-0.467375123708681	0.734865145705786	11.1081492322458	552.447495153718	2.0484257533527e-119	2.47828942636969e-117
comp53255_c3_seq2	5.83247450275875	-0.377672108841893	-0.301101305507753	6.74479384839183	550.995605983919	4.22789875056557e-119	5.03990401060067e-117
comp50554_c0_seq1	9.29647137482842	-1.19680830462206	1.17249045625639	6.85248104644328	548.869959540228	1.22142424940141e-118	1.43490796603592e-116
comp54088_c0_seq2	8.18402524816573	-0.162932199225382	-0.0144361652378348	6.54429018298831	547.460981499402	2.46755085687399e-118	2.85742389226009e-116
comp56655_c0_seq1	7.91202917431495	0.166174905690995	-0.051536685461095	6.42807153742531	541.428401946253	5.00987442020081e-117	5.71972423241517e-115
comp54297_c0_seq1	8.42085975871043	-1.2347167795314	-1.05369510440956	6.77917093257699	541.284618746221	5.38259251325615e-117	6.05990207117421e-115
comp45697_c0_seq1	7.76664460875118	0.47729583418661	-0.353654773919907	7.62728742589633	540.351217057445	8.57637390229604e-117	9.52329956876872e-115
comp43481_c0_seq1	8.19424799212855	-0.629156673208447	0.444364891374183	6.89138375043444	539.763365572286	1.15005481541847e-116	1.25977626132191e-114
comp54811_c0_seq2	6.66387075175328	0.190616682017563	0.503348218204281	7.58646909111436	537.453093744186	3.64300455805433e-116	3.93735932634512e-114
comp35786_c0_seq1	4.67423798699327	0.272313746596206	0.473747293898405	8.68954781382216	534.307475545302	1.75086273794295e-115	1.86743333602179e-113
comp35884_c0_seq1	8.9897784710344	-1.23227527010493	1.15490499076084	6.54494368220953	532.68605422925	3.93261801099297e-115	4.13997423339078e-113
comp15468_c0_seq1	7.04645951043513	0.137226026254153	0.955139030680074	8.52103864049554	531.829366691662	6.03060521316964e-115	6.26719049460937e-113
comp45330_c0_seq1	8.69026557472666	-0.020363213712829	-0.163661478533718	7.03433786420167	530.060306977259	1.45809737978111e-114	1.49611865322857e-112
comp50326_c0_seq1	7.40152167556055	-0.214430413927374	0.615622964959898	11.1350020970673	529.427183060215	1.99990373631534e-114	2.02640246082152e-112
comp17392_c0_seq1	10.1828995827867	-2.76701908645231	0.0162173510230527	7.09911114311962	529.289481792691	2.14217165307462e-114	2.14375844689172e-112
comp58105_c1_seq3	8.73401040863856	-1.82880988798657	1.70323151191158	6.49638242160474	528.905799740605	2.59425637019012e-114	2.56451733375135e-112
comp58534_c0_seq1	8.49113839534596	-0.695716454422683	0.380051220972064	7.08362621664727	527.543634688737	5.11971059174036e-114	5.00004506706594e-112
comp59389_c0_seq2	7.20984307192976	0.272850825268142	1.03537138990854	6.91278082087869	527.057741964236	6.52463671878262e-114	6.29627443362523e-112
comp57143_c0_seq1	5.44797205076038	-0.0397275723984626	0.0645653822351131	7.45791512482526	526.777441037896	7.50425926738921e-114	7.15641477899494e-112
comp62365_c0_seq1	5.69657893223863	-0.419507942812312	-0.101033422003826	8.01301106695196	526.67760715745	7.88761092880482e-114	7.43453188242929e-112
comp56394_c0_seq1	5.42039594157151	0.449930051774566	0.346372734876907	7.38286860146347	526.524733574663	8.51292400559023e-114	7.93045990465912e-112
comp56494_c0_seq1	7.30193415061391	-0.506406836229545	0.20290391125322	6.97849787485744	526.502145349609	8.60943093523319e-114	7.93045990465912e-112
comp16432_c0_seq1	7.1428217491121	-0.813036035149455	0.58931836853267	6.62317585309627	526.050088200812	1.07882646130414e-113	9.82580594981055e-112
comp35807_c0_seq1	3.93747381233739	0.0199864455292086	0.40071167286063	8.1331473188776	523.71370298007	3.46200967072095e-113	3.118116710096e-111
comp44661_c0_seq1	5.34827664224502	0.267096396023842	0.183562451498214	8.55679544593585	523.493941455463	3.86329696411047e-113	3.44130606495379e-111
comp45501_c0_seq1	4.80038232525621	0.321553195389647	0.392399151224348	6.82051584611889	520.741973623935	1.52545758365357e-112	1.34406077968433e-110
comp60536_c3_seq1	8.5707789509459	-1.17285923773707	1.15573009158134	6.18234014616474	520.556377672867	1.67349598258082e-112	1.4503771306819e-110
comp57248_c0_seq1	8.19946652572825	-0.305873579555109	0.133749099536034	6.5407895398551	520.546330580226	1.68190784954476e-112	1.4503771306819e-110
comp50499_c0_seq1	7.15940683250073	0.312152494381518	2.38094436891725	6.55681286257107	519.714258284259	2.54764170727939e-112	2.17380880833755e-110
comp54773_c0_seq1	7.36999705960101	-0.66801425803746	-0.068998467033489	7.38977554868101	516.375755225202	1.34800361092254e-111	1.13822054897272e-109
comp50332_c0_seq1	6.87145346579993	-0.254877534218035	1.46888314084411	6.7209643000034	512.502708015418	9.31288094519236e-111	7.78249617955972e-109
comp35758_c1_seq1	7.80306130236237	-0.473523355551516	0.772247418896502	11.0368505874538	510.163372136133	2.99278005599942e-110	2.47545664631952e-108
comp44207_c0_seq1	5.61376944350289	0.190751780580247	-0.397852578210999	7.20539549841418	506.194814978874	2.16843736497374e-109	1.77549023035123e-107
comp58133_c0_seq1	6.96130401819975	-0.105143884543527	-0.231639351741036	7.20221986907951	505.771776669761	2.67810528474107e-109	2.17087214381111e-107
comp51022_c0_seq1	8.45569621983773	-2.01977504340631	1.96599958481873	6.24270923972769	504.141954325179	6.04005587680869e-109	4.84759336013973e-107
comp15119_c0_seq1	6.24939240219192	0.295883487313449	-0.220762058817912	6.48142395166818	500.372640187802	3.96199505900487e-108	3.14862077924446e-106
comp60027_c0_seq1	8.0666198814384	-0.30783314993226	-0.194640380233314	6.25648842689835	499.586673613599	5.86468114550921e-108	4.61544712286385e-106
comp60875_c9_seq1	5.71583757846648	0.186283796798103	0.218342641432571	6.59855755377662	499.407110267939	6.41443397149636e-108	4.99955786278361e-106
comp57969_c0_seq1	7.22430118577508	-0.0683149904722698	-0.0808946470607879	6.81239186322528	495.379652448507	4.78584293677215e-107	3.6946707471881e-105
comp49295_c1_seq1	7.2886238882533	0.352267477557969	-0.505554349457275	6.62077057331257	492.044264707106	2.52794487375746e-106	1.93316237232811e-104
comp44945_c0_seq2	7.92073207140236	-0.758063580668279	1.23405449938594	9.53803529662782	490.41154138804	5.70939562700082e-106	4.32526737873539e-104
comp65715_c0_seq1	7.67997677753807	0.164272718650099	-0.282617372349669	6.83554737469331	489.528833609384	8.86906997332398e-106	6.65672974108928e-104
comp60212_c0_seq2	6.51685810208108	1.01613542048864	1.73411248002364	7.06066905006785	488.484754997588	1.49325894358622e-105	1.11049146758807e-103
comp54185_c0_seq1	6.01796263688407	0.925931195572751	0.969166566253347	6.49982571779033	486.923722319198	3.25399481072646e-105	2.39789835779534e-103
comp50578_c0_seq1	6.42663528970908	0.082315724738434	3.31944620313357	6.58293304306233	485.299767600533	7.31697689999685e-105	5.34337069832203e-103
comp35812_c0_seq1	7.13018682959462	-0.232897679844234	-0.0917287232619836	6.98150271940965	483.627427129701	1.68550210050085e-104	1.21988214523749e-102
comp35664_c0_seq1	5.58245970522073	0.862547756021077	1.20931663927438	6.39278628781815	480.442291628827	8.25930976344026e-104	5.92477565862361e-102
comp57202_c0_seq1	5.755146187418	1.2726407158831	2.0443731528411	6.68692003586757	480.28419061099	8.93724741272879e-104	6.35485329189295e-102
comp51351_c0_seq1	6.64563919643037	0.596842708450032	1.5614858943838	6.8958793504867	480.141936756438	9.59466362078467e-104	6.76298637478961e-102
comp44117_c0_seq1	5.60206522590657	-0.0698375486077657	-0.275587500145173	6.8405205630614	477.235363344528	4.09139220984953e-103	2.85903665974485e-101
comp55913_c1_seq1	8.42146887840845	-1.10631683787536	1.08957793027245	6.06500623645281	474.587945942285	1.53301917152222e-102	1.0621071285777e-100
comp55811_c0_seq1	8.34774169228833	-1.83602083019237	2.11358947599177	6.30894003119856	470.702921125773	1.06510544887209e-101	7.31673285470943e-100
comp35695_c0_seq1	6.76103372608906	0.669612295416986	1.12006469605949	7.31270537914117	468.310980585989	3.51313065391811e-101	2.39306193955128e-99
comp50554_c1_seq1	7.96418927375035	-0.490365638263255	0.206696670171713	7.19683745643139	467.913228398656	4.28431472136879e-101	2.89405459428462e-99
comp50930_c0_seq1	7.13507389128311	0.0574448358626817	-0.0701786006700616	6.80882903835859	466.504557466432	8.65203845667292e-101	5.79615072147031e-99
comp66045_c0_seq1	-8.85004241517142	2.87197951309521	-1.9750302818876	6.25415370263827	466.104854397164	1.05615466255944e-100	7.01736860221873e-99
comp43291_c0_seq1	6.6395833208366	0.191188485082105	1.77511441704253	7.15663541741935	461.942756485194	8.4251221831419e-100	5.55236100947547e-98
comp15441_c0_seq1	4.42845509091226	-0.0261161709489736	-0.0383492821019377	8.00328935579563	458.462527557459	4.78259107935885e-99	3.12642607171636e-97
comp57931_c5_seq1	5.64580154246822	0.274858822861738	0.850741777465309	6.36091622287959	456.802542663136	1.09481349848465e-98	7.09964657497324e-97
comp55448_c1_seq1	6.75091662429982	-0.0990819871641624	2.43378890074526	6.01725977492795	455.543306763298	2.05202635533311e-98	1.3201369552643e-96
comp58351_c0_seq2	6.5093464720074	2.28629402777672	-0.174288453300909	5.8112713026229	455.377448783865	2.22904998208172e-98	1.42273064210665e-96
comp58932_c1_seq1	5.64083023835723	0.967417422590418	2.01934640321758	6.42928737138982	452.969232380064	7.41158312429996e-98	4.69361662543558e-96
comp59445_c0_seq6	6.55674585360874	-1.30365191392745	-0.710377855489464	6.15723059093146	452.769654080893	8.1875428227507e-98	5.14482342024939e-96
comp59193_c0_seq2	-7.15411981268062	2.07822236020533	-0.758416117676872	5.37566109316926	450.131460762088	3.05327975225793e-97	1.90383735936945e-95
comp60975_c0_seq1	7.17423199899059	-0.043267157079509	2.12205289237416	6.29653429535971	449.645614361967	3.89075008512651e-97	2.40751299160576e-95
comp35825_c0_seq1	8.3063270162587	-1.92400332362369	1.78581214424118	6.08759339499115	446.199892076058	2.17069787883273e-96	1.3330058337741e-94
comp44403_c0_seq1	7.76359867878532	-0.33181620418466	0.754449287438751	11.3015634454532	446.082262431822	2.30189408226262e-96	1.40294386697901e-94
comp58399_c0_seq1	-4.82289329396205	0.286074791627576	-0.559187402401553	5.33768708581767	445.031895685444	3.88740645664228e-96	2.35159080130913e-94
comp50676_c0_seq1	9.53241362624332	-2.38535115697796	0.0525131862724189	6.70728544267429	443.112699370477	1.01268380330122e-95	6.08060363671089e-94
comp54099_c2_seq1	8.3211780814209	-1.04532243325132	1.27047545186831	6.07420764805226	442.228216294291	1.57436344348033e-95	9.38366917121436e-94
comp54960_c0_seq1	8.21982508903502	0.197982713782261	-0.214142732556986	6.67393589243943	440.34013854751	4.03804324453556e-95	2.38922471096389e-93
comp57708_c0_seq2	7.12750711851693	0.382973827789637	-0.37218222944272	5.95473988268875	439.233348994319	7.01395940273252e-95	4.11993876221375e-93
comp54437_c0_seq1	7.66681082807593	0.10753008687392	-0.0980851507007384	6.8659000641757	437.316563044359	1.82491500681104e-94	1.06422741332448e-92
comp56723_c1_seq1	6.84041802358936	-0.298174983715632	-0.844425306229158	5.94619102421321	436.890854854695	2.25669816800259e-94	1.3066282392735e-92
comp35795_c0_seq1	6.57758562490146	0.232985510432159	0.108396960767797	8.71550598070123	435.69368997516	4.10054325822398e-94	2.3561231024959e-92
comp67200_c0_seq1	8.41363269010748	-1.24011703347555	1.07822876941556	5.97550547150366	435.680589073691	4.12743005865307e-94	2.3561231024959e-92
comp58925_c1_seq4	5.65289796609611	0.573578309451236	1.60641874229081	6.01099210990597	435.496576578394	4.52424602745574e-94	2.56458309780113e-92
comp35649_c0_seq1	9.01123625623615	1.63828733236685	-1.33575795438467	6.63123400764676	434.778402415035	6.47349767483177e-94	3.64403973279072e-92
comp51193_c0_seq1	6.69368832179839	0.0728119085642591	-0.176492378488471	5.93325350611437	434.512731761804	7.3908863511647e-94	4.13176032845111e-92
comp15424_c0_seq1	6.77483631755953	0.334031506107871	0.955435974163951	7.41972509632428	434.161159824291	8.8077389757648e-94	4.89010494092805e-92
comp58543_c0_seq2	6.21919317116852	0.131018732834729	0.744863582515222	6.30709786655604	433.662475200116	1.12954621836459e-93	6.22864057555333e-92
comp53911_c3_seq1	3.90989095412251	0.0513812420714195	-0.0556002883212132	7.57312860714369	433.530014823496	1.20670573922378e-93	6.60915994739726e-92
comp57417_c1_seq2	-7.63017338189746	0.554308234290415	-0.637177221214767	9.63863344465717	432.750274553973	1.78045380387977e-93	9.68614666728146e-92
comp49499_c0_seq1	6.46759501346659	0.754074915575313	0.745099436939534	6.02314156398191	430.867606312523	4.55412057643914e-93	2.46104675950771e-91
comp67354_c0_seq1	7.69494114442097	0.0230632707643198	-0.112423360750263	6.11723357526687	429.233715509699	1.0289119398346e-92	5.52341734059554e-91
comp57226_c0_seq1	8.10472198463198	-0.389939631420784	0.319933540496137	6.86823155811588	428.445911890428	1.52423006824394e-92	8.12855850867457e-91
comp44348_c2_seq1	7.27214709792343	1.12209630151919	0.511544341303187	6.84493928460413	427.749638915985	2.15721157874423e-92	1.14289915407194e-90
comp35698_c0_seq1	5.59618201119101	0.732352889798705	1.01816597644121	6.83345546356906	427.65067651978	2.266376942744e-92	1.19293840895343e-90
comp35646_c0_seq1	-3.97828438733617	0.1448779189874	0.0409730682994383	7.37050372940157	426.774897254304	3.50802044159786e-92	1.83458152900595e-90
comp54749_c0_seq2	5.61411700066917	0.312260896116297	0.12782403544375	6.93915927171115	426.574138691909	3.87752482471487e-92	2.01482155314992e-90
comp54185_c1_seq1	8.76727096706811	-1.05763056375103	-1.00666797804247	6.49318111880469	426.536290632735	3.95142743533094e-92	2.04014463635621e-90
comp44042_c0_seq1	7.11106010330817	-0.0904240938190839	1.39087179402524	7.0006431828931	425.507610337982	6.60096173438518e-92	3.38654403917255e-90
comp52791_c0_seq3	7.48816992673608	-0.488250296013088	0.255287499194997	5.89151675389569	424.818785837155	9.30750737652944e-92	4.74507262856275e-90
comp35906_c0_seq1	7.50578466954132	-0.899161476726577	0.76474293965727	6.47585046492474	422.702951948395	2.67424840409746e-91	1.35484109772587e-89
comp56863_c0_seq1	5.8426091239856	1.04187551658645	1.00341703168262	6.38638438830605	422.094815009882	3.62197828117967e-91	1.82358732591568e-89
comp59226_c0_seq1	4.9225568097683	-0.648074756955174	-0.0311122231127494	6.89371708755909	421.871637215285	4.04849847593589e-91	2.02574868184792e-89
comp50981_c0_seq1	7.22697204771842	-0.321055022195535	0.123305462115783	6.59379202809776	421.595540446745	4.64628816075077e-91	2.31060195282489e-89
comp54953_c1_seq1	8.70355355378649	-0.864136833451829	1.12145188233767	6.45752760198883	419.795618595195	1.14032734084264e-90	5.63627647857956e-89
comp50459_c0_seq2	9.82093431090886	-2.54689863813249	0.543903595264252	7.29335664799287	417.25893833696	4.04159484375529e-90	1.98552532142305e-88
comp44166_c0_seq1	5.85490359389106	-0.172050725400363	1.22493901029015	6.79022008877732	416.19417618308	6.87401946604452e-90	3.35667480673234e-88
comp57311_c0_seq1	8.61326609977773	-1.13991994954451	1.16002979835669	6.22872450185667	414.581863152278	1.53631850982731e-89	7.45712445548514e-88
comp56549_c0_seq1	8.05943670535396	-0.651395645945699	0.282723954579145	6.67767570366419	414.318239177904	1.75222156162358e-89	8.45446903483379e-88
comp56640_c0_seq2	7.74246473651618	-1.08272901900745	-0.314106779408741	6.63981359423323	413.753954661559	2.32181342529527e-89	1.11364613168304e-87
comp35939_c0_seq1	8.48948120874488	-0.92903119080197	1.28268146626761	6.29460306817028	413.076854366014	3.25464660434148e-89	1.55189208087012e-87
comp65863_c0_seq1	4.69654390609875	-0.36845728872163	0.487557037801868	6.40012873917768	412.925117379864	3.51053825746117e-89	1.66411831081756e-87
comp54030_c0_seq1	5.31822547850127	0.62049331826333	0.349020494249041	7.54034536700803	412.888545928816	3.57516392612674e-89	1.68489992937113e-87
comp44395_c0_seq1	-4.61195870151633	0.128889079990537	-0.520033280067682	6.33063896121287	412.209740636333	5.01581007102819e-89	2.35018245293379e-87
comp48807_c0_seq1	8.541296177419	-1.59852617884004	1.68880565858853	6.43934253873955	412.099869648347	5.29836236784252e-89	2.46830605481215e-87
comp59816_c0_seq2	7.04448643049975	-1.24850325197911	-1.06940185811382	7.04041266117125	410.51958207544	1.16537707845127e-88	5.3980266273863e-87
comp60765_c3_seq2	6.53854884109754	-0.769850155106281	-0.628008550920443	5.76093120463156	410.440976978969	1.21197586102218e-88	5.58197518718511e-87
comp68991_c0_seq1	8.47157019730856	-1.32847720279975	-1.34626567668474	6.09508520924325	410.207845215162	1.36142935627707e-88	6.23488495027228e-87
comp57690_c1_seq1	8.39723395443136	-1.20516609890066	1.1659542349935	6.02530487610497	408.657385195923	2.95022343835566e-88	1.34351186468039e-86
comp56800_c0_seq1	6.0718287377024	-0.412194680873904	-0.305141436517738	6.70165266876803	408.466854906648	3.24434673420435e-88	1.46919969985813e-86
comp54913_c0_seq1	8.48085564654174	-1.11000972741314	1.49838659580357	6.27561153531733	408.094924180937	3.9056573682526e-88	1.75884770150309e-86
comp64630_c0_seq1	3.91791343439894	-0.241775141018999	0.382289771792047	7.01517726625315	407.553073662729	5.11762407431153e-88	2.29190390863919e-86
comp43941_c0_seq1	6.18249066541278	-0.0506097267654293	0.397357752880433	6.87143093022499	406.563873394599	8.38195586527956e-88	3.73319418922836e-86
comp55602_c2_seq1	7.21191641298395	-0.711361863790338	0.569892370429999	5.99943142814263	401.868120160091	8.71976948220450e-87	3.86242903949452e-85
comp50670_c0_seq1	4.02637375796299	0.325663057858465	1.05900595171221	7.5747428431871	400.660181234264	1.59277766423483e-86	7.01687812298234e-85
comp60656_c0_seq2	8.49986901034336	-1.22562234600424	1.07024800838961	6.06086869606303	400.327945713602	1.87983589839282e-86	8.2367296174985e-85
comp58553_c1_seq1	6.58658914394105	-0.404431189466798	-0.147960996470026	6.87056157408108	398.596317578381	4.45863145703854e-86	1.94310035434163e-84
comp50610_c0_seq1	4.33422942008382	1.56106885181856	2.45596547037059	7.45188770854337	397.331473881827	8.37861394739968e-86	3.63192752179796e-84
comp46087_c0_seq1	7.64834754920477	-0.124072896917259	0.0211493124293605	6.08855975027559	397.001195675867	9.87896637673733e-86	4.25951603456557e-84
comp59485_c0_seq1	5.48892265153188	-0.164110619625784	0.171541518139799	6.60723602744525	394.471638543693	3.48832392258053e-85	1.4961033712401e-83
comp61319_c9_seq1	8.24380642789321	-1.1057631413991	1.12968632629847	5.92030219861292	393.097138383892	6.92359400824414e-85	2.95382384372774e-83
comp56547_c0_seq1	6.567649736839	0.0468956703463698	-0.174397813540496	6.2414628225535	392.758832724952	8.19610884914168e-85	3.47841143094987e-83
comp57519_c0_seq5	5.21728514882897	-0.6643732443114	-0.0613418621143866	7.46216202082154	390.869954363535	2.10247533174113e-84	8.8763880411946e-83
comp57917_c1_seq2	6.96151521126698	0.465847821961534	2.06905829929199	6.32340549747803	390.069059665976	3.13472793730257e-84	1.31658573366708e-82
comp46947_c0_seq1	8.19589395361002	-1.04633693239223	1.18669489529919	5.92359763692158	388.608935165009	6.49309342926176e-84	2.71304202771113e-82
comp35920_c0_seq1	7.42341588017963	-0.0720781248759779	0.271021517668014	6.0092047669206	387.072528610657	1.39708323789472e-83	5.807567551987e-82
comp43792_c0_seq1	8.7895412180758	0.0748146669465834	-0.368272767984797	5.62135957596623	386.753289093963	1.63819657812989e-83	6.77511299098006e-82
comp56587_c0_seq2	6.49008811743946	0.285667016951858	0.248740641379263	6.88816475392289	386.527803918856	1.83317324393544e-83	7.54299609915771e-82
comp61937_c0_seq1	7.45292447405571	0.317696660260378	1.81006109779919	8.53999784514667	386.007941877733	2.37574251565829e-83	9.72614587471014e-82
comp54580_c0_seq1	4.05759146072503	0.601420094312657	0.600170014837156	6.6525391626101	385.125610323589	3.6889338699242e-83	1.50263808791988e-81
comp50269_c0_seq1	5.78681573159913	0.281807599837539	-0.656040639200642	6.20938966005231	384.364485021391	5.39199860884273e-83	2.18537703616396e-81
comp54698_c0_seq1	5.35700518880649	-0.0716794887614127	0.513341376496148	6.16742937243682	383.056378198718	1.0352973692413e-82	4.17518431595521e-81
comp51584_c1_seq1	6.54542522275528	1.05931562433104	0.779097476128003	6.24542516426489	382.182823447608	1.60052299839535e-82	6.42269278464986e-81
comp50200_c0_seq1	4.82745162789653	-0.559046600601305	-0.407649704716976	6.23714963350558	381.703295570405	2.03291332985598e-82	8.11763322749387e-81
comp48972_c0_seq1	8.03648477346765	0.386457162581944	-0.192985382895714	6.62585427342703	381.333210234326	2.44496321134045e-82	9.71513323094397e-81
comp47765_c0_seq1	8.15247424033281	-1.29758065249794	1.31886717948365	5.81884099566189	381.128724266581	2.70744737922744e-82	1.07056431492769e-80
comp59006_c1_seq1	7.83187036747072	-1.27598242925123	1.35553785517535	5.5548697240637	380.158195709097	4.39295594396039e-82	1.72860683891956e-80
comp57060_c0_seq1	6.36745145242305	0.462323282077036	0.482845202107244	6.24117663991673	379.242765256487	6.93456549600403e-82	2.71553564785549e-80
comp60033_c2_seq1	7.53906530930981	-0.18013521691513	-1.73524623344131	5.86566407812717	378.828782962599	8.52468698029075e-82	3.32216887799215e-80
comp58110_c1_seq1	-4.08212110087271	-0.33639555194273	-0.00901059180652079	7.13033682102421	378.598158385279	9.56370978329463e-82	3.7092550958558e-80
comp50138_c0_seq1	5.0797662535536	1.58305672556754	-0.64572958720893	6.40976592148688	377.66609204169	1.52226261260015e-81	5.87593368463659e-80
comp35684_c0_seq1	6.20060215660617	-0.227032346495338	0.854252814498695	6.31396010258889	375.814075325435	3.83343450066873e-81	1.47269289395359e-79
comp50595_c1_seq1	4.28625959465498	0.941453807361125	0.942720124828476	6.24819832793858	375.437729684602	4.62481165280939e-81	1.76833600272042e-79
comp56408_c0_seq1	-6.55713165693	0.891890701814943	-0.676266104347287	7.5602058646038	374.733620759442	6.5702801764307e-81	2.50040803334025e-79
comp51782_c0_seq1	5.63677705912926	0.497327553963422	0.0137873593406449	6.1497312553367	374.011214432238	9.4196688129161e-81	3.56802969147187e-79
comp58872_c0_seq2	6.73951434252267	-0.747685775945827	2.87398348569197	6.28724970532833	373.715413436653	1.09168441021965e-80	4.11590410662348e-79
comp49375_c1_seq1	5.1430329909827	0.624209684044502	1.11083880514351	6.40490246923495	373.642010208605	1.13238468797574e-80	4.24958809293118e-79
comp60471_c3_seq1	8.47510241875585	0.401382931505817	0.0922496431730135	5.64677111896293	372.818421532091	1.70748688269642e-80	6.37828971020148e-79
comp36790_c0_seq2	8.01878468919942	-1.1208484050372	1.24320923072293	5.7503872024677	372.307621337486	2.20282550400663e-80	8.1908731814118e-79
comp48103_c0_seq1	6.52688103183794	0.0782071142857034	-1.11421473486099	5.75721716753605	370.375382831701	5.77346432793602e-80	2.1369726868607e-78
comp54044_c0_seq1	8.35258558282827	-1.25817149395205	1.28363897759866	6.00190209355523	369.89725179327	7.32794703721368e-80	2.70001539471155e-78
comp56012_c0_seq1	7.29104073031147	0.146449849965697	-1.63405204727702	5.86045104696811	369.79613614211	7.70690946299445e-80	2.82679674692457e-78
comp14118_c0_seq1	7.03659525514234	0.186790510175105	-0.14515799669165	5.64597836737255	369.684521436738	8.1480161897676e-80	2.97512699253406e-78
comp56835_c0_seq1	7.64284285945785	-0.476400789824643	0.523532165467634	6.46487772937633	368.844637134105	1.23862316757315e-79	4.50236744230852e-78
comp59151_c0_seq1	6.72703011292073	0.31189940403346	1.98630414264552	5.99906761017255	367.94025664274	1.94443179961712e-79	7.03641257486444e-78
comp60875_c16_seq8	-7.43474509482963	1.07603972868952	-1.23445141595181	4.54529834797045	367.902075038809	1.98180687950363e-79	7.13978958455842e-78
comp15608_c0_seq1	8.40772868633794	-1.13203182178348	1.00292591386322	6.00366244385193	367.530000593985	2.38582033114202e-79	8.55728301072442e-78
comp54601_c0_seq1	8.56804710512689	-1.79280952349578	1.80536570558911	6.39795501350353	366.771425699181	3.48268306367304e-79	1.24364004027021e-77
comp58703_c0_seq4	5.00987342835689	1.13282632639974	3.82888453737353	6.35165896421378	364.550940797366	1.05383991258446e-78	3.74667821553053e-77
comp50613_c0_seq1	5.59124542774457	-0.527208561739672	0.630492758899286	5.89701245617935	363.103857763003	2.16843176244051e-78	7.67568029097937e-77
comp48575_c1_seq2	6.54455445744665	0.856633572826997	2.15091017327015	6.1813465220911	362.722275244073	2.62287915226472e-78	9.24393843837295e-77
comp57049_c0_seq1	8.01051633096201	-0.835442539566916	1.44736638592968	5.96678435479729	361.312833917176	5.29655869648428e-78	1.85861059712994e-76
comp68316_c0_seq1	6.04352102003415	0.956421517037308	0.00424716409212735	6.18217441938681	359.918429216208	1.06157306296199e-77	3.70909967602152e-76
comp50607_c0_seq1	7.78455266976817	-0.15551222047954	0.821146797037026	15.6833216415366	356.322871194217	6.37598484981314e-77	2.2181859739307e-75
comp35751_c0_seq1	-3.18329023549283	0.110623895634	-0.347960339434081	10.9212399745802	354.889060849916	1.30324052688548e-76	4.51455885082635e-75
comp50837_c0_seq1	4.53644921025187	-0.137049523317813	-0.103225899321756	8.0548478370058	354.706992711977	1.42708342565124e-76	4.92252691418255e-75
comp58868_c0_seq1	7.81629101202738	-0.197745470946397	-0.212561256765691	6.08232556202347	353.551566969296	2.53888102779936e-76	8.7204108522634e-75
comp48559_c0_seq1	8.05131076435207	-1.92658005140291	2.10251919220805	5.97920264455275	352.794289104679	3.70356655679835e-76	1.26671352360369e-74
comp56959_c0_seq3	5.00649332540962	-0.206555443357936	-0.550099687716397	7.38139814523436	352.747526214478	3.79093173002892e-76	1.29114674805103e-74
comp15654_c0_seq1	5.33923113049012	1.30419270871271	0.428743724817231	6.03211170643189	351.406483774021	7.39821903382672e-76	2.5092034932301e-74
comp66452_c0_seq1	8.18247621590724	-1.41246643082402	1.44725499589713	5.82224465468957	350.823949582942	9.891556677075e-76	3.34087326768208e-74
comp59550_c0_seq1	-6.07006478338958	0.353885225033697	0.101987064968532	5.21622938424845	350.15688532281	1.37944650843328e-75	4.63974829765981e-74
comp56500_c0_seq1	7.95190820250713	-0.849632846842641	0.769061407378611	6.86953287580242	349.733354359433	1.70377454359774e-75	5.70694068198483e-74
comp46218_c0_seq2	7.74520984838883	0.203552495374495	-0.373920436896088	6.19590989944606	349.329192842118	2.08413103871101e-75	6.95224946493474e-74
comp14165_c0_seq1	7.85058333846604	-1.22809802595953	1.08395314609	5.49307960624757	349.02050813271	2.43088367889405e-75	8.07571438570295e-74
comp60995_c0_seq5	8.24175769568025	-2.63458531854197	0.294036722813597	5.52657123422538	348.633276316423	2.94856573280364e-75	9.7555403388189e-74
comp54776_c1_seq1	8.30016734115073	-1.21595354320995	0.982688591491098	5.85094936004121	348.081568653509	3.88213526646047e-75	1.27921091341173e-73
comp58125_c0_seq1	8.28204559541331	-0.904983684915158	0.967162116240491	5.9908593303349	348.051878265266	3.94002912473551e-75	1.29303142044964e-73
comp60261_c0_seq2	9.62710113316831	0.134793694817053	-0.250281605226652	6.45457725501003	346.251135480591	9.66953980892804e-75	3.16053587464398e-73
comp15634_c0_seq1	8.31814086113558	-1.27899958979574	1.06497687372343	5.86124335392734	344.956524611559	1.8438187610354e-74	6.00240758110561e-73
comp54918_c0_seq1	8.35852864225493	-1.12433851613052	1.07915326103452	5.9999495529159	344.381543704926	2.45591642366302e-74	7.96306341208497e-73
comp60310_c0_seq1	7.66888980166966	-0.0701229184473518	-0.145973663508314	6.05713786313393	343.81268772225	3.2612356009017e-74	1.05321019047447e-72
comp49897_c0_seq1	8.56318347072868	1.22911069493099	-1.15076518118345	6.09367320037185	339.576196805299	2.69555241614327e-73	8.67069360526086e-72
comp47882_c0_seq2	6.147206714447	-0.116791749154309	0.0125896525992293	6.05633583957167	338.295523878097	5.10418819824004e-73	1.63535768912782e-71
comp16429_c0_seq1	4.66868934773212	-0.37394070713333	-0.235123235318844	6.11612756325131	337.14264784785	9.06846122740962e-73	2.89405302005443e-71
comp16207_c0_seq1	5.30976109522844	0.612547506216896	0.396686217066681	6.5348863820694	336.771980817285	1.09090129635696e-72	3.4677827091253e-71
comp54456_c0_seq5	8.72414172311589	-0.330573249655146	0.338728125573977	5.68090107404759	336.146378471228	1.49015657302346e-72	4.71844108630006e-71
comp56212_c0_seq1	6.59309261655545	1.74123528882953	1.65640494906802	5.74237586225951	333.309109670827	6.13066052732958e-72	1.93366281068224e-70
comp59013_c3_seq2	-6.27411741749084	0.484793532830483	-0.22813312554628	4.91127468957931	331.752788838135	1.33182695696118e-71	4.18441446245247e-70
comp54010_c0_seq1	7.18934262248634	-0.48811444111716	-0.980305598684614	5.94887079218393	331.562048724668	1.46467865583451e-71	4.58404833366584e-70
comp46807_c0_seq1	8.46562853928395	-0.932904335266572	1.07546522894843	6.18973210298994	331.341906197496	1.63456552034886e-71	5.09607234921072e-70
comp68272_c0_seq1	4.31499147435195	0.174503616284456	0.762720621244621	6.23654900945362	330.222105332669	2.85649385760134e-71	8.87154758992967e-70
comp50713_c0_seq1	8.32847685545882	-1.14552816106534	0.942036486874177	5.89034212662395	329.683624661698	3.73603238823161e-71	1.15588849385517e-69
comp50730_c1_seq1	8.34102438329169	-1.43309822299152	1.08317136542803	5.80304691317991	329.000923147361	5.25061242344054e-71	1.61830662754407e-69
comp49817_c0_seq1	5.05233276563339	0.423448709313534	0.398260919205782	6.21483313150529	328.170448771103	7.94327629158495e-71	2.43894687952983e-69
comp35878_c0_seq2	5.99332880089612	0.858275251411268	0.724309393061142	5.64132140095584	328.060433037825	8.39106167271288e-71	2.56671494034002e-69
comp36417_c0_seq2	5.52500565216124	-0.277782996293305	1.06039032202209	5.90362555082666	327.939857807362	8.91087084789881e-71	2.71547064259653e-69
comp60579_c0_seq16	6.69124975003168	-0.113092312051617	-0.0668810664599454	5.21195474918305	326.109982795033	2.21852725173889e-70	6.73534902718929e-69
comp53976_c0_seq1	-8.40046360731532	2.82377653859016	-1.86854872902705	8.08984644975108	326.056189882504	2.27882064858672e-70	6.89258215576268e-69
comp35935_c0_seq1	6.73825682331779	0.644845705247766	2.00025909115968	6.17429070606271	325.396136659985	3.16666069030123e-70	9.54236117307871e-69
comp15555_c0_seq1	8.19539189201767	-0.940244268277104	1.020544157762	5.90964260115835	325.220100620991	3.45708836678825e-70	1.03789475189576e-68
comp51213_c0_seq1	7.76049853719725	-1.6617327590712	1.58655974649121	5.66427138703283	325.205976030769	3.4815146169335e-70	1.04137112490269e-68
comp59582_c0_seq1	8.7529812140265	0.103664494376662	-0.069600815282779	5.74733824327508	324.969378660724	3.91730704517019e-70	1.16741510691726e-68
comp59209_c0_seq5	8.32220716495102	-1.53718160215689	1.15423246059091	5.77408474647411	323.996141933274	6.3632056742045e-70	1.88938260787918e-68
comp54866_c0_seq1	8.4943457992906	-1.44572489521288	1.10268163773135	5.95515935324431	322.940264824926	1.07709071837685e-69	3.18645889166524e-68
comp54931_c0_seq2	5.7073473499525	-0.513103417944258	-1.24507131788497	5.90928007851063	322.751075948826	1.18360736206693e-69	3.4888441006962e-68
comp14113_c0_seq1	8.69705411190811	0.101103799896804	-0.446212414854548	5.51732085175844	322.281768267278	1.49555533724071e-69	4.39238100133085e-68
comp57321_c0_seq4	5.69850522760255	1.01008612502779	-0.307738000185813	8.44729332003803	321.343984343279	2.38677122525165e-69	6.98453702234293e-68
comp53953_c0_seq1	4.41740017425569	0.472559975628381	0.332787272681929	6.15558031822808	321.040678872007	2.77631634643071e-69	8.09525910221846e-68
comp46749_c0_seq3	9.14486959507884	0.166823381973567	-0.154847392843418	6.04075756620654	320.446073790817	3.73409819919276e-69	1.08489605744289e-67
comp55275_c2_seq1	6.86416926328232	0.227000291166123	0.0943055999670128	5.6102832068573	320.402420454807	3.81623874050783e-69	1.10480111537702e-67
comp58498_c0_seq2	-3.76640113587664	-0.00944512825389756	0.133043910719969	6.93946877942143	319.79561120317	5.16408514722238e-69	1.48968235599234e-67
comp57003_c0_seq2	5.58389721414769	0.120738854402531	2.53705897718557	5.11645380528366	318.95124711325	7.86636676737938e-69	2.26116202185735e-67
comp60875_c16_seq11	8.95967587498087	0.0652147540427375	-0.257662756948179	5.79445486772465	318.621224394546	9.2728729681505e-69	2.65603916183138e-67
comp58016_c1_seq4	8.13487831454944	-0.828650627209504	0.69229992737801	5.82985952578178	317.977179331769	1.27829261232096e-68	3.64853518150482e-67
comp49085_c0_seq1	7.8570204467453	-1.70888762176378	1.84529279971637	5.81682710160501	317.771683607079	1.41616417857789e-68	4.02786906370258e-67
comp19671_c0_seq1	-2.9795530439971	-0.275858736631961	-0.60619690469529	6.34079696524434	317.316297059933	1.77701081739524e-68	5.03652086916287e-67
comp50931_c0_seq1	-3.6379785995994	0.407211528441737	-0.112090639901858	6.37926121877015	316.764039731176	2.34010496639922e-68	6.6093696368056e-67
comp56057_c0_seq2	7.57932882793723	1.28328387941106	-1.37784527604857	5.15320692972795	315.785691698286	3.81077589876988e-68	1.07257463317461e-66
comp58814_c4_seq4	8.20054598892555	0.0944011190456027	-0.0097849269877848	5.22779522409654	314.381778569677	7.67198624106185e-68	2.15187268062448e-66
comp73123_c0_seq1	6.81884108486695	-0.581123339850526	-1.18988755987308	5.76240993688711	314.162592952785	8.55761758182618e-68	2.39200165925114e-66
comp57535_c1_seq2	7.98337005722989	-1.09626838177888	1.27379390313937	5.74097930364611	311.278505084919	3.60275404903242e-67	1.00357128252429e-65
comp50711_c0_seq1	6.46382451496803	0.702332356855499	0.973359372811675	6.06406628480118	311.039760797166	4.05799705596244e-67	1.12651110053533e-65
comp60097_c0_seq1	4.38793061415062	-0.057089870681713	-0.261140984066736	7.27437835318242	310.854490487388	4.45055432501827e-67	1.23126939790437e-65
comp57893_c0_seq1	6.48156918754152	0.136660640803068	1.56373078254608	6.75662595952363	309.945992194952	6.99939495325153e-67	1.92983317996792e-65
comp18097_c0_seq1	6.56004626423249	0.776946379792078	2.04705646276195	6.12681227414286	309.810497781721	7.48838901043165e-67	2.05765699384946e-65
comp35876_c0_seq1	8.61127018817195	0.401285410520168	-0.166770276381986	5.71302830662446	309.615858968231	8.25121845689144e-67	2.25960732471493e-65
comp50827_c0_seq1	4.05319005783027	0.488521769820697	-1.28682677866692	6.42073477700642	309.294887982937	9.68260607055422e-67	2.64266682854924e-65
comp49053_c0_seq1	4.49358031818209	-0.207779825020148	0.0531838906718826	6.40464577638114	308.95377355106	1.14769433365342e-66	3.12188264046799e-65
comp35883_c0_seq1	5.50023020687158	-0.750167275333657	-0.36569836112282	5.7225411675487	307.763609233911	2.0769899746643e-66	5.63079623231732e-65
comp49874_c0_seq1	8.05803981078141	-1.15132895492685	1.05252416444245	5.6964736710854	306.597333705439	3.71422991248629e-66	1.00351802340819e-64
comp50911_c0_seq1	2.72593172016845	0.0977724927939022	-0.0209227427267066	8.40338846169053	306.590790245102	3.72636226308739e-66	1.00351802340819e-64
comp46729_c0_seq1	7.72716861317619	-1.58229889838976	-0.554315777498215	5.95936578866988	306.5433929515	3.81543368105838e-66	1.02410282843242e-64
comp19851_c0_seq1	-3.75278108625318	-0.641081611509477	-0.249062973157233	5.60044283265254	306.055239626411	4.86632627783684e-66	1.30186273294209e-64
comp50607_c1_seq1	7.66396421618297	-0.252194731910798	1.03898065055188	15.909569917274	305.86745325771	5.34374964034242e-66	1.4248827165992e-64
comp54359_c2_seq1	6.7493018608151	0.37221454149674	-0.201318442558198	5.45157795547628	305.36373580911	6.86864978034245e-66	1.8254844301461e-64
comp43629_c0_seq1	7.68979528053907	-0.0829055652745525	0.92259810026258	15.820629936796	304.539743701638	1.0356572635621e-65	2.74347639818118e-64
comp50989_c0_seq1	8.10293795829564	-1.22645331060652	0.999569339259397	5.68035357592743	303.495052524954	1.7431170146344e-65	4.60251026730503e-64
comp57373_c0_seq1	3.82181884293047	-0.288983168683274	0.662825785683371	7.83142862717016	302.30517711198	3.15396788540201e-65	8.30067002567166e-64
comp60471_c3_seq5	7.97583762449666	-1.28264701804051	0.708114246993923	6.48837837172012	302.230657016891	3.27330079496066e-65	8.58685315338224e-64
comp50657_c0_seq2	8.58999404288746	-2.53722988194038	-0.0168318327887151	5.74628009451259	300.933416196322	6.24813298701506e-65	1.63378599976594e-63
comp57975_c0_seq6	9.49412673666439	0.0755519916459505	0.156754924588056	6.51021538315275	300.223488388184	8.90019730015786e-65	2.31977489759098e-63
comp58717_c6_seq1	8.11129859729101	0.0280276433096022	0.0847494255057821	5.18986155186679	299.534029691217	1.2549248983845e-64	3.26039141868742e-63
comp59044_c1_seq1	7.97928683091265	-1.17522697197559	1.08146851319734	5.6350866386505	298.628128841989	1.97096191642898e-64	5.10435057334612e-63
comp61474_c8_seq10	8.78895723627824	0.319504820196392	0.308708982198181	6.07917355234576	297.720859028871	3.09765489854552e-64	7.99668490688217e-63
comp58555_c0_seq1	4.464745056799	-0.241840733886823	0.437909199812408	5.71420518451528	297.604306193558	3.28290033706235e-64	8.44799686737377e-63
comp57888_c0_seq1	7.56371967714015	-0.143376781702933	0.815630854256727	13.4652692632451	296.912855758392	4.63342900480739e-64	1.18856251623319e-62
comp54176_c0_seq1	8.43605357057463	0.0926433891831973	-0.290865774485878	5.34934375645724	295.44390234669	9.63411681378591e-64	2.4635378830457e-62
comp47477_c0_seq1	8.33248088282099	0.36472630720502	-0.556880920122023	5.31692169046787	295.2756461251	1.04767217603077e-63	2.67057567890107e-62
comp49975_c0_seq1	6.64757448691883	0.654584730143232	-1.02138286202112	6.08966717678549	292.389677226793	4.41354103455437e-63	1.12150983153911e-61
comp47853_c0_seq1	7.596079976605	1.27063705053024	-1.77410344810463	5.00666057597378	291.886606083835	5.67095601734649e-63	1.43652404614408e-61
comp47380_c0_seq1	7.73694042957914	-1.09030239816241	1.12022391189718	5.47167969865729	291.486617921556	6.92176504094675e-63	1.74790739632132e-61
comp60648_c2_seq1	8.01454421325224	-1.155694384081	1.27694979898945	5.73367960396189	291.057698068883	8.57112884357424e-63	2.15768852192586e-61
comp72724_c0_seq1	7.83700613282612	-1.35732100218029	1.1945843221219	5.45966903806735	289.480726816123	1.8806211150841e-62	4.71960209252993e-61
comp19367_c0_seq1	-2.79183059098178	0.0634753569923809	-0.648107453818299	8.00819942005662	288.478455770426	3.09880126355106e-62	7.75274167973608e-61
comp35875_c0_seq1	7.29144356879324	-0.0726422482622413	-0.0831538139198261	5.73913500245554	287.487901915292	5.07630828920376e-62	1.26610938437802e-60
comp57067_c0_seq1	5.15079001909104	-0.396183491226998	-0.316199299578397	5.57406856359498	286.239781866114	9.45443418675425e-62	2.35084796066963e-60
comp46351_c0_seq1	7.12181779555732	-0.755636981715915	0.40787371361249	5.82855575275212	284.535774611363	2.20987878168923e-61	5.47806648451771e-60
comp37037_c0_seq1	5.65861358373022	1.72156866397189	-0.858852003577862	5.56379254302242	283.781070278415	3.21867928417372e-61	7.95445557241224e-60
comp60803_c1_seq3	4.40771551629789	-1.04121099735068	-0.130419976476548	5.95567264305285	281.901552596998	8.21063797084034e-61	2.02296144047513e-59
comp14264_c0_seq1	7.61320339177597	-1.7260442096672	1.17190459852796	5.09071630872539	281.325942714399	1.09377571816735e-60	2.68671090044379e-59
comp57772_c1_seq2	-3.08520509459674	-0.507041959577986	-0.613153055544513	5.61702780149453	280.20755011617	1.90952463928863e-60	4.67631623144219e-59
comp46815_c0_seq1	4.68834128760027	-0.384463858880699	-0.0856822820561518	5.91355602710785	280.186043480977	1.93009561287475e-60	4.71245633673577e-59
comp59497_c0_seq1	7.34101978432044	0.202036579624489	-0.252338084887109	5.865917974759	279.834166763646	2.29994224687138e-60	5.59859815409592e-59
comp58958_c0_seq2	7.54823375883905	-1.53834263845464	1.26031781823018	5.14431936557304	279.564256401925	2.63098974942067e-60	6.38527033197722e-59
comp36005_c0_seq1	8.02946325561065	-2.02805697407085	2.37401964414406	6.17457343200193	279.02939553246	3.43439166550547e-60	8.3102026389813e-59
comp52081_c4_seq1	3.29381816610692	-0.131115558051022	0.0322485713582132	6.29485754707928	278.790990103818	3.86753815994499e-60	9.33043581086728e-59
comp46122_c0_seq1	6.47420369854919	0.695676187816565	-1.77502819624617	5.97565496884628	277.951934232046	5.87466911965383e-60	1.41305839418142e-58
comp14604_c0_seq1	8.04656766133223	0.298567085823109	-0.123857241766092	5.18045284958554	277.626351237486	6.90923819201867e-60	1.65699067409773e-58
comp50994_c0_seq1	8.63329776235982	-0.958730466121011	0.998961187055269	6.29175320403043	277.178907667901	8.63462630754454e-60	2.06466905159162e-58
comp54478_c0_seq2	5.72456206008555	-0.722179678058678	0.498259830991917	5.35620003050536	276.208456940957	1.40029032199965e-59	3.33845686768504e-58
comp50688_c0_seq1	5.56978898566924	0.609074912699681	2.24962080743883	5.20763567464057	274.419967111725	3.41336888121468e-59	8.11400825546222e-58
comp35830_c0_seq1	-4.27999267298612	0.051997960672347	-0.243547525436917	5.29713698961226	273.876592785108	4.4745376929642e-59	1.0605439338938e-57
comp57217_c0_seq2	7.02880379409086	-0.437870356738361	0.895167618834979	6.75667040734884	273.081554431675	6.64908442815612e-59	1.57135505465404e-57
comp61366_c0_seq4	8.85885307498897	-0.157803430277853	0.100230681714689	5.76483202567528	270.966943210288	1.90663731801249e-58	4.49279130808409e-57
comp79876_c0_seq1	7.53200301818672	-1.20947447428371	0.972272056753174	5.18213845003949	269.924755682737	3.20439140672445e-58	7.52892659214735e-57
comp54609_c0_seq2	3.40616190385202	0.189380104725094	-0.0431898562906997	6.09286311079083	269.810938798634	3.39132702017437e-58	7.94511468946053e-57
comp75298_c0_seq1	7.96113467187931	1.82922184343164	-1.66024060248601	5.65978379932757	267.466387196454	1.09043897420894e-57	2.54729058355552e-56
comp35518_c0_seq1	8.16272449364796	-1.00762576582897	0.87010548957697	5.79041170894381	267.323575178018	1.1708398187644e-57	2.72724930198398e-56
comp58744_c0_seq1	8.52310570174107	0.140070056487512	-0.351901432767637	5.43977566261752	267.089822153334	1.31543003373626e-57	3.0552652875261e-56
comp58732_c0_seq1	-8.28909390590044	1.85978222965522	-0.885117772792879	10.830106742443	264.74489443462	4.23020785527825e-57	9.79716139282442e-56
comp58427_c1_seq2	8.22164497842349	-2.51745507645988	0.261500211504717	5.74711136696616	263.476890473135	7.95555611564127e-57	1.83725748927032e-55
comp53949_c0_seq1	3.36398254659591	1.39750304217273	1.05004584918202	5.91409387334965	262.787903648387	1.12128968033357e-56	2.5821517468136e-55
comp57075_c0_seq1	-7.62262507291254	1.58611735373628	-0.657685067546172	8.40993721188908	261.023451321654	2.70029930065154e-56	6.20074394648198e-55
comp49182_c0_seq1	5.88166854874144	1.40707882296071	0.275401283680967	6.48948907409982	260.405768894274	3.67307145793165e-56	8.41071108417908e-55
comp16291_c0_seq1	3.59076910143492	-0.486642086371646	0.117669616166366	6.03723090071213	260.279325783011	3.91184363864148e-56	8.93222662952897e-55
comp35694_c0_seq1	3.36424327286952	0.0381303142809086	0.596694241288912	6.90204940102109	260.11514155392	4.24519516615987e-56	9.66616629687976e-55
comp14005_c0_seq1	4.33406728422561	1.01905319864317	1.50185555146841	5.77643219482184	259.373683673846	6.14169224905905e-56	1.39452541655105e-54
comp60361_c0_seq3	5.64916108608697	-0.139083749529789	0.41930403648152	6.21984132160705	258.676196502292	8.69291048197105e-56	1.96828861359937e-54
comp58920_c0_seq1	5.83644999018392	-0.49554368638266	-0.65799626893778	5.29677140212125	258.640932119529	8.84694632064039e-56	1.99758626393067e-54
comp57097_c0_seq1	-6.79659071398643	1.33887989480193	-0.0985317669331901	8.69189110735163	257.27843907121	1.74388104351232e-55	3.92663881630858e-54
comp57955_c0_seq1	6.13926668885832	-1.22152767205479	-0.367641471612944	5.55629093120972	257.115855804798	1.89097224008515e-55	4.24604459227985e-54
comp59868_c0_seq1	7.52930427385562	-1.45599998935667	1.5368527549864	5.27379538031287	257.103875502469	1.90228946404759e-55	4.25965701535076e-54
comp76686_c0_seq1	8.33252780715031	0.494261929536137	-0.210193653091529	5.50971997257949	255.844692263179	3.56161425580843e-55	7.95329067702015e-54
comp56643_c0_seq1	-2.454098045655	-0.344866129951228	-0.568776606809794	7.33977153115711	255.592782231118	4.03771991687002e-55	8.99169166102977e-54
comp50595_c0_seq1	6.45650391320658	-1.22139183814683	0.806121036711858	5.99225252651806	255.522901309698	4.18072615052053e-55	9.28464826742998e-54
comp54476_c0_seq2	7.87086057370583	2.1737786896733	-2.06760139655354	5.67250945188974	255.163868059477	4.99933038077184e-55	1.10722874498734e-53
comp35541_c0_seq1	7.4913777522531	-1.09454029397237	1.08284891264393	5.25384854749316	253.797376017903	9.87381186027774e-55	2.1808479275044e-53
comp50858_c0_seq1	7.92033030405785	0.619768988631173	-0.186393373704037	5.22409410507829	253.104493065942	1.39429112346776e-54	3.07122930620372e-53
comp53918_c0_seq1	2.82280775570066	0.818093026811219	0.498943958633031	5.85366433458844	253.062701085901	1.42361612317549e-54	3.12732582505705e-53
comp57218_c0_seq1	5.19242235188719	0.379581686115212	2.86944176223611	5.44087750152822	252.964835999829	1.49472292536244e-54	3.2746551440508e-53
comp45375_c0_seq1	4.01855910256062	0.524707646221031	-0.101299352573874	9.78786386500602	252.901505735119	1.54261923630611e-54	3.37047750121222e-53
comp56286_c0_seq1	8.57302226722652	0.347412012788438	-0.524044515340315	5.54781195098681	252.220404436898	2.16559377734601e-54	4.71889869870074e-53
comp56751_c0_seq1	4.97048107366964	0.888495539378912	-0.555396339517415	6.08330707610568	251.718216828601	2.7809697051577e-54	6.04357652279042e-53
comp50741_c0_seq1	7.73827613254975	-1.31937112306654	1.08968939455035	5.34154322356677	251.011900674339	3.95335207059857e-54	8.56841494231872e-53
comp57215_c1_seq1	7.52246247953532	0.332749250177289	-0.504391455148802	6.01110227763808	250.504675319576	5.08946700144044e-54	1.10013918703136e-52
comp59229_c2_seq1	8.63986044971327	-2.39146646943075	-0.547560115874214	5.3723198824537	249.446365910184	8.62122962317427e-54	1.85860870546411e-52
comp50296_c0_seq1	4.83634621299255	1.93130072361793	-1.45944910652994	5.3688763162538	246.654915695313	3.46178977876838e-53	7.44330714766485e-52
comp35522_c0_seq1	7.62281566245381	-1.10694404543813	1.14720446714125	5.37445948918829	246.608414485721	3.54289014778754e-53	7.59753109469995e-52
comp20612_c0_seq1	8.82492925306537	-2.84424761844795	-1.07349274347414	5.28039959957973	245.525416787713	6.07546616515863e-53	1.29941236767219e-51
comp58433_c0_seq1	8.27265635567384	-1.20173748544671	0.901606323009014	5.79139345975894	245.494721294234	6.16904754605219e-53	1.31595524758682e-51
comp35552_c0_seq1	7.65861332330386	-0.917387312566353	0.956241269512416	5.43258898829778	245.379938443128	6.53193962582969e-53	1.38970872984187e-51
comp35841_c0_seq1	4.69919364980768	-0.368798947244012	-0.823899578765051	5.72454203374244	244.363353671913	1.08366869169127e-52	2.29953361645273e-51
comp47432_c0_seq1	7.19356538865061	0.135278318258105	-3.00700234713627	5.67297098270356	244.207609714175	1.17105845712758e-52	2.47848560142981e-51
comp57990_c2_seq4	7.73496771823971	-0.19956142234423	0.438066090554276	4.93775850106103	243.999444085615	1.29896511444303e-52	2.74203417126958e-51
comp46020_c0_seq1	7.60889036944824	0.191298237819253	0.0215458733873537	4.80841725947849	243.857393243902	1.39417729383513e-52	2.93537692047468e-51
comp57471_c0_seq1	7.53397381989274	1.61432513567809	-1.67091356730253	5.16465251547044	242.754986829447	2.41394084310222e-52	5.06927577051466e-51
comp50957_c0_seq2	3.479483489938	-0.328321379946656	0.0173763033674765	5.71698445037	242.684063160714	2.50071711847215e-52	5.2379361659781e-51
comp57726_c0_seq1	4.18407259089822	-0.367472051468234	-0.134095057449651	6.19121375161634	242.560989865034	2.65876736849298e-52	5.55463100232064e-51
comp59854_c0_seq1	8.24103202905784	-0.0708517206171538	-0.177586242083575	5.16378092272393	241.351832538419	4.85477604482924e-52	1.00973911306546e-50
comp61135_c4_seq1	8.17479862586787	0.0931385602570518	-0.271404691319652	5.12840179658548	241.350454596662	4.85810824198779e-52	1.00973911306546e-50
comp53701_c2_seq1	7.32638594264069	-1.47524532457569	1.16491488205452	4.95745610443905	241.14961531608	5.36907646467698e-52	1.1130878215517e-50
comp54927_c0_seq2	-3.66864401537414	-0.316415890071076	0.0793592562721101	5.7263589002253	240.931371471078	5.98543389874215e-52	1.23770222406132e-50
comp61486_c0_seq1	-5.97506345555104	1.12395803920397	-1.30346367178583	5.73931550042541	239.719513226876	1.09436282304404e-51	2.25722774646183e-50
comp35953_c0_seq1	3.91270108171177	-0.337875332228191	-0.493248922848991	6.19882741700931	239.704399001396	1.10262989927273e-51	2.26850709733623e-50
comp61177_c0_seq1	7.92537893601016	-1.62514258052023	1.34382467435672	5.45778374768396	239.519569972126	1.20892333063728e-51	2.48089430839135e-50
comp54240_c0_seq2	-4.27310110022942	-0.321909278696324	0.389755592805867	4.91500835124545	238.412995664497	2.09744745373226e-51	4.29341137877618e-50
comp50630_c0_seq1	-4.04959260956756	-0.245954055569616	0.322262137382205	6.53208272362484	237.431786619496	3.41876956457601e-51	6.98049019910657e-50
comp56099_c0_seq1	7.8562070705694	1.5306705716268	-1.52132083065749	5.45669179440141	237.298858570051	3.65270159679835e-51	7.43939676976067e-50
comp14422_c0_seq1	5.6788957433879	-0.566467087197593	0.318746770578025	5.36939382171298	236.1963721414	6.32431224255597e-51	1.28483396085611e-49
comp14489_c0_seq1	8.01975173032783	-0.219641639722013	0.0400915372111062	4.95245813467015	236.062905943233	6.7588593670509e-51	1.36968285073287e-49
comp58954_c1_seq3	3.09237820468614	0.303563019730377	0.331377173489277	5.84342169407812	235.689847539341	8.13844536029201e-51	1.64514309452686e-49
comp58574_c1_seq1	4.51405118237113	0.348190051607873	1.76061719246295	4.9718708145949	234.801552406357	1.26654089556024e-50	2.55387574612222e-49
comp58016_c1_seq5	7.4526520327383	1.24505873852945	-1.55677576476086	4.93073104601503	234.604857585167	1.39685235539335e-50	2.80964893122047e-49
comp48073_c1_seq1	4.9792509787417	2.08884917167887	0.312412541962874	5.64711735781552	234.598810565472	1.40106423862772e-50	2.81114522730601e-49
comp60767_c0_seq2	8.44468849329384	-0.175890553522441	-0.814921755032947	5.04696454668451	234.403597109151	1.54407669069772e-50	3.0904409024187e-49
comp59039_c1_seq1	2.41667746544509	0.0732362099793648	0.0423743234645991	7.75437999990158	234.291349600952	1.63282624061952e-50	3.26002204592657e-49
comp60568_c0_seq7	3.96267926486588	0.550495944815356	0.874474428850055	6.16015239413004	233.301603827422	2.67269274656024e-50	5.3230583301271e-49
comp35505_c0_seq1	7.96794333978099	0.373577635196315	-0.291541194633485	5.08263001295098	232.638456483423	3.71823455009327e-50	7.38725717231765e-49
comp57556_c3_seq23	2.57753235630911	0.96152882786286	0.375862717694305	5.75209857894846	231.911549503988	5.33960141162664e-50	1.05825938979573e-48
comp59096_c0_seq5	7.93115571577604	0.18284598235132	-0.40711117496414	4.92877455067611	231.54895597045	6.39599542747799e-50	1.26453509597894e-48
comp57084_c0_seq1	6.39190243941765	-1.46455784228068	-1.66273088860137	5.49935196592237	230.830636443678	9.14577096377596e-50	1.80378636088487e-48
comp35479_c0_seq1	4.03952949225072	0.598336887185973	3.39708593711715	5.04285595692164	230.131668171303	1.29522871101835e-49	2.54833105133852e-48
comp19852_c0_seq1	-3.95498523951781	-0.0324760549010498	-0.0949805851258325	7.42620017011942	230.111295861312	1.30843211405869e-49	2.56807523403383e-48
comp60866_c0_seq2	4.34098763501219	-0.650825308348454	0.097967919587162	5.66945590324919	229.727482666016	1.58392929731042e-49	3.10128765313968e-48
comp54660_c0_seq1	-5.20962203137861	1.06747195753926	-0.148782750243852	6.82279790985409	229.687537568125	1.61574314960361e-49	3.15595517365949e-48
comp44945_c0_seq1	6.54826526696957	-0.321571864157823	0.717634037902243	7.03443378436412	229.658656857056	1.63914215356729e-49	3.19396305211934e-48
comp35989_c0_seq1	6.41715245219121	-2.76553829683329	2.4498330972607	5.96195076613208	228.732009446769	2.5999510569245e-49	5.05400557971942e-48
comp59925_c0_seq2	6.16199973779369	0.0413306782396034	-0.0985641642569668	4.83192226163356	227.238622798561	5.46814322637718e-49	1.06040117208166e-47
comp58543_c0_seq1	6.17541424717068	-0.26279114492232	0.528290166168895	5.27804919464471	226.260351957967	8.89897540173685e-49	1.72160130325725e-47
comp35862_c0_seq1	-4.37509716663088	0.105103551821482	-0.383466283100227	8.90464974689892	226.084435016525	9.71342657596971e-49	1.87469132916215e-47
comp54803_c0_seq1	7.10453158257122	-1.56707759089488	1.39485728402239	4.7969240703935	225.330758162662	1.41355450595943e-48	2.7216800060112e-47
comp35938_c0_seq1	-3.28077579241357	-0.0112009750524958	-0.021053382640852	5.78050957227609	225.297331132719	1.4372728221867e-48	2.76078992811502e-47
comp46841_c0_seq1	7.80656480401008	0.038793825809934	-0.0263908092608289	4.8824842327362	224.828184795024	1.81536672021396e-48	3.47880913334619e-47
comp20176_c0_seq1	-9.53808266933704	3.33383526795806	-1.16133878890973	6.42152894509433	224.583466547878	2.05054758759127e-48	3.92022140212614e-47
comp58731_c0_seq6	7.73350594774845	0.426258456778226	-0.219723285559737	4.94333569462532	224.509212803751	2.12776015735069e-48	4.05826443187874e-47
comp60181_c3_seq2	4.07733800877315	-0.5101870469113	1.60616729703182	4.94162416564167	224.304403910001	2.35613363113754e-48	4.48329089530538e-47
comp51133_c0_seq2	8.12281984987381	-2.92006803485262	-0.425548479499111	5.19856340026315	224.076247794833	2.63951628852119e-48	5.01075387230745e-47
comp60161_c0_seq1	5.38406523515327	-0.0337635822631778	1.23646463835205	6.05598294003087	223.223483809304	4.03532974727516e-48	7.64261283444217e-47
comp59969_c1_seq1	5.03399784288783	0.453463923190716	0.282060431796491	5.39254968053699	222.321093780162	6.32351744357697e-48	1.19483525402412e-46
comp61352_c0_seq9	8.61996387320146	-2.3095282897734	0.0500291965715077	5.71755379678502	222.224384967617	6.6353698154942e-48	1.25084436568363e-46
comp59178_c0_seq3	6.62595873861301	0.0969398765339106	-0.125485105194297	5.23300390599037	222.061328143399	7.19638680162149e-48	1.35345502120519e-46
comp15572_c0_seq1	3.82482550868456	-0.595308926689006	0.530078641995472	5.27904069934089	221.669111769043	8.74787846064455e-48	1.64144219449039e-46
comp59490_c0_seq4	7.11604185306794	-2.09450086818238	2.23611038736416	5.12675931739171	221.547299292354	9.29470662168776e-48	1.74002059758432e-46
comp50759_c0_seq1	-3.3693169908281	0.085467996596624	0.354792719680504	7.08169884752453	221.519968042236	9.42202040317739e-48	1.75979026239991e-46
comp50468_c0_seq1	-3.58053849296155	-0.037262426773203	-0.407541841160237	5.86633653112101	221.450258634409	9.75469086489685e-48	1.81773618737595e-46
comp35831_c0_seq1	3.66593800118412	-0.0596735110095409	-0.057561493711062	5.76951579872374	221.398515145224	1.00091955679013e-47	1.86088392828917e-46
comp61342_c0_seq1	7.878548799524	0.0665739111468716	-0.384914178138108	4.83883257496872	221.191589547531	1.10951010276564e-47	2.05805237826504e-46
comp59533_c0_seq4	7.61914052933359	0.513917173833894	0.111869123927209	5.00825558411659	221.149226468217	1.13315433750137e-47	2.09711165748541e-46
comp51232_c0_seq2	4.53874295723911	0.418361141915768	-0.377880076028256	5.71705541139616	221.062677121983	1.18303822185015e-47	2.18444369619984e-46
comp58606_c0_seq1	4.70376792139328	2.04390412382287	0.0701944240922062	5.29503924645005	220.848399937771	1.3161935924263e-47	2.4247875591381e-46
comp59473_c0_seq1	6.29069703714711	0.578156780955449	1.92904542185977	5.7125872653017	220.644878183063	1.45651696056335e-47	2.67721688941643e-46
comp56685_c1_seq1	4.4797321762389	1.23614194565078	2.16812237724979	8.36853468373613	220.235026756303	1.78613194192986e-47	3.27565283286956e-46
comp68347_c0_seq1	5.92794402381432	-0.29715233832769	0.113050517376053	5.6402269033091	219.676890373937	2.35811644105315e-47	4.31487401155233e-46
comp56896_c1_seq3	7.92463802343204	0.201656932720937	-0.166839320320442	4.98403616496163	218.937126782142	3.40782261383201e-47	6.22157885309059e-46
comp56211_c0_seq1	7.87125499762544	-1.11119303070335	0.961393456208958	5.50461541962795	218.75191686972	3.73691040441112e-47	6.80705522205764e-46
comp35873_c0_seq1	5.02659416457005	2.46595427413781	-1.75163890859735	5.85964976459034	218.319072240022	4.63529619296195e-47	8.42459886550439e-46
comp57124_c0_seq1	-2.69925363556795	0.191986379640584	-0.0875373503205932	5.42885624036076	217.617362389652	6.57293153911453e-47	1.19195040393876e-45
comp56070_c0_seq1	4.57397415884486	0.878250333923291	-0.984700163032656	5.44119203577208	217.30268720239	7.68738418266209e-47	1.39093607555042e-45
comp59636_c0_seq4	-7.1108574336108	1.51111097607523	-0.0136384869718882	5.87916138531877	216.862513066733	9.57028522075302e-47	1.72776685967537e-45
comp53943_c0_seq5	7.84343287421149	0.236311853241426	-0.204100749319534	4.90190971656081	216.604126533942	1.08836929326052e-46	1.96051588692662e-45
comp59300_c0_seq1	5.7347441873586	-0.492642358929746	0.0506980272710914	6.61162392504238	216.425475299965	1.18957646221233e-46	2.13807246179449e-45
comp56951_c0_seq1	6.91390054158449	-1.30473632846041	1.55644649995545	4.82639657718163	216.317960877474	1.25496584586212e-46	2.25060910322087e-45
comp60117_c1_seq1	5.85735631091273	0.136901294952513	0.144112939602539	5.11748131052104	215.889561021313	1.55321370686151e-46	2.77932677876808e-45
comp75772_c0_seq1	7.71987437529423	0.37977720462894	-0.509926783118621	4.80974648637117	215.775517309621	1.64392425090173e-46	2.9351651933501e-45
comp54359_c1_seq1	7.92360831230232	0.499508027343539	-0.198793271783744	5.12015341504529	215.187050020022	2.20332347789583e-46	3.92530551908211e-45
comp77946_c0_seq1	8.20728293949449	0.417477773786602	-0.532552896551199	5.22798325831624	215.174487043879	2.21714305784857e-46	3.94126351467554e-45
comp50955_c0_seq1	-4.11293867693013	0.278535120366363	-0.409429050461636	7.42057047178956	214.666097383503	2.85548698588276e-46	5.0648966099706e-45
comp57896_c0_seq2	8.02578697859439	-0.347890249594714	0.193146962598643	5.91679555759941	212.260304369435	9.45511413671564e-46	1.67343133607461e-44
comp59261_c1_seq4	8.15774253718686	-2.82367493013515	-0.424586554661551	4.74685169612419	212.203137009139	9.72797761270038e-46	1.71797356271349e-44
comp50886_c0_seq1	7.61534209549538	0.259430706675857	0.124521137640504	4.88447961959594	212.140284635385	1.00370723271283e-45	1.76870670181962e-44
comp60055_c0_seq2	4.75734788523348	3.32555938381974	0.459660574709093	5.21089756166297	211.412500427756	1.44179692109381e-45	2.53518564910769e-44
comp60181_c3_seq1	-4.34570895837623	0.60241463223118	0.413096162616497	5.2027642312033	211.056250717245	1.72147187918117e-45	3.02040066074514e-44
comp50966_c1_seq1	3.06099431242216	1.0986078485214	0.232982546907944	5.94723372345023	210.586986172891	2.17430573012556e-45	3.80667867136021e-44
comp16769_c0_seq1	7.80594469904621	-1.11311222488981	1.05617435221986	5.46751563192187	210.29050924416	2.51997769144775e-45	4.40235757906798e-44
comp58916_c0_seq1	7.15396949327895	-1.23727256952612	1.14419966671929	4.90298271708722	210.038864597086	2.85616354223384e-45	4.97893799426829e-44
comp56951_c0_seq2	9.73922150302656	-1.51105117881065	-2.25434570322241	5.48692866094612	209.764497010573	3.27401046926776e-45	5.6950920308765e-44
comp55254_c3_seq1	-2.14286950859415	-0.656299390471903	0.0504503820683316	6.34635201495005	209.512842769227	3.7108027711858e-45	6.44106365379702e-44
comp60091_c0_seq1	8.37926124418537	0.468808606395101	-0.49374464302905	5.41984674330768	209.336038929861	4.05208680712859e-45	7.01842214927015e-44
comp57301_c3_seq3	5.13556415368441	2.52996507682123	1.97974806170515	4.93719327059479	209.159901687566	4.42328978834669e-45	7.64502921627681e-44
comp55517_c5_seq1	5.05201252175201	0.0557621835280238	0.769012475133695	5.55957134435026	208.558269884475	5.96717091795155e-45	1.0291465417216e-43
comp50892_c0_seq2	4.53535342760998	1.25577087483927	-0.358534783565646	5.37835896871583	208.270263416131	6.88669821411575e-45	1.18521392194527e-43
comp59597_c0_seq1	-7.16669680877848	1.48441551548725	-1.10806944669813	5.96440458023577	207.516876132443	1.00190735040009e-44	1.72064851320828e-43
comp13797_c0_seq1	4.52837332302954	-0.020904718240659	0.236641033753123	5.14582220660039	207.499643744246	1.01053571403468e-44	1.73179756828015e-43
comp54927_c0_seq1	3.15137182547133	0.550941800688577	4.92467039974165	5.34098933907943	206.555526195279	1.61652844149093e-44	2.76446825880285e-43
comp60361_c0_seq1	3.67912010722861	-0.117696173338542	-0.226560833602268	6.47623104743119	206.353554350657	1.78743630650226e-44	3.05030709484365e-43
comp58038_c1_seq1	-4.73846458456827	-0.0564387276655964	0.141972449022402	6.0878448171125	205.374448868392	2.90949589047288e-44	4.95470035465823e-43
comp50306_c0_seq1	7.31836874291738	-0.700654053229935	0.611960222083207	5.13141225169468	205.237130243373	3.11524540775553e-44	5.29395791934305e-43
comp59616_c8_seq6	8.0426898339684	-1.92263736384192	-2.34524914323584	5.1534585266123	204.888843617306	3.70472928921238e-44	6.28253883229196e-43
comp61231_c2_seq1	-3.37492017232356	-0.21099352787686	-0.480734165156103	5.47808166512712	204.401557456177	4.72125273675489e-44	7.9896606856232e-43
comp15422_c0_seq1	3.83885440155913	-0.444332018168122	-0.851169259129424	7.61555118779586	202.966270714553	9.64296187089253e-44	1.62845518594698e-42
comp46596_c0_seq2	-4.15491402545011	0.900603675576241	-0.186789656106511	5.95071568083776	202.342570513391	1.31517463012504e-43	2.21638369060158e-42
comp56742_c7_seq1	-2.17734044582438	-0.262819268387034	0.0733806827529283	6.49015804905648	202.252628107182	1.37536688659208e-43	2.31198567600535e-42
comp59086_c4_seq1	7.09856654806641	0.262505277986253	-0.0974988666592215	4.38058027172332	202.249355739899	1.37760804528816e-43	2.31198567600535e-42
comp44655_c0_seq1	-1.84447275439586	-0.212659991071635	-0.527584651702017	9.21099746711465	201.484855729151	2.01521041243307e-43	3.3750610750377e-42
comp57410_c0_seq1	7.15572307110014	-0.84136083672538	0.958342021074304	5.04913438064904	201.17468139664	2.35148726238539e-43	3.93013520595793e-42
comp56069_c0_seq1	4.86473995247397	0.986757254134374	0.926485361531656	4.93915276255958	200.989352813857	2.57862415939959e-43	4.3008904189492e-42
comp48559_c0_seq4	7.40749236262436	0.160489860254	-0.2967777066844	4.53108131506912	200.748340994303	2.90713441079012e-43	4.83885657779563e-42
comp53528_c0_seq2	-1.92794700076502	-0.277815370054467	-0.38707304383543	7.76278120878594	200.564846193384	3.18503256243306e-43	5.29054794079556e-42
comp54661_c0_seq1	-3.64830842633102	-0.199161439711568	-0.146519364276634	6.44575132420444	199.883667965284	4.46990577500692e-43	7.4096229472814e-42
comp49981_c0_seq1	2.60473822539183	0.0996562099222693	0.639382988942146	6.0537277468368	199.471834903575	5.48634782287402e-43	9.07598682698303e-42
comp50480_c0_seq1	3.03733370086813	-0.127270209893577	0.508927187168561	5.66172613603693	199.270949672434	6.06301129981599e-43	1.00095253760302e-41
comp46272_c0_seq1	8.14457157340152	0.0277967388943067	-0.230562819395181	5.09024659994902	197.842331682842	1.23413296487043e-42	2.03330931163409e-41
comp57020_c4_seq2	-2.73638344356061	-0.0301149142896232	-0.197934694551515	7.19153440333394	196.461043042625	2.45357188137589e-42	4.03420966945902e-41
comp48073_c0_seq1	5.04806883215092	0.11672006117915	0.264624558619405	4.69488851499872	195.132463305655	4.75157486442374e-42	7.79681494959896e-41
comp58275_c0_seq1	7.51529754900933	0.361887711317312	-0.379091409838479	4.6523268567791	195.028053128042	5.0048943133393e-42	8.19589359675321e-41
comp35850_c0_seq1	7.37180409759048	-1.12392536553345	0.912644473273458	5.05806519697256	194.25875153074	7.33832716435389e-42	1.19928387085187e-40
comp56689_c1_seq2	-2.43760574155929	-0.132950800208756	-0.0189997556647492	5.35090483924464	194.215684356395	7.49723854702804e-42	1.22278904752936e-40
comp58706_c4_seq1	-8.16609755327744	1.99578249553773	-1.48049587188263	9.41185122045579	193.86975584507	8.90503360821969e-42	1.44948197647046e-40
comp46111_c0_seq1	6.63472809068514	1.57118725756876	-1.41070486944374	4.48869371007753	193.859826115496	8.9491289709975e-42	1.45374026931675e-40
comp54814_c0_seq1	5.00599751651514	-0.42680694187227	-0.244586148478472	5.37874893308753	193.545728117495	1.04625548264672e-41	1.69618938846686e-40
comp54642_c0_seq1	7.93144508312716	-3.01906725862894	-0.614639960871737	4.88338476326483	193.383366002522	1.13426322075785e-41	1.83519713921419e-40
comp60568_c0_seq2	-7.32493983423319	-0.140197672656051	0.325171743953467	3.98272574194802	192.789260250098	1.524266662792e-41	2.46129592999839e-40
comp61213_c0_seq1	2.95229384646621	0.236730203927359	0.12217811380492	6.65247764904049	192.68067127427	1.60886518871886e-41	2.59273582897716e-40
comp58926_c1_seq1	-7.89527387690151	1.82603478412981	-1.26675487734933	4.84074384107054	192.532322644155	1.73207865807698e-41	2.78575984174047e-40
comp58972_c0_seq1	2.93916096155038	-0.0513159900210507	0.0734818960803894	5.47880658651383	191.889529629665	2.38467717606787e-41	3.82776102756557e-40
comp57152_c0_seq2	-3.40082853862616	-0.232248967669164	0.0461852671489136	5.76417759729812	191.670567596487	2.65907886223753e-41	4.25978127614573e-40
comp54427_c0_seq1	-3.31031228955628	-0.574041938512502	-0.178410151794336	9.76195656394507	191.65445936381	2.68047038569199e-41	4.28558046280459e-40
comp61043_c0_seq7	8.20353886509567	0.117813844466563	-0.059645344475801	5.26164276484015	191.572403107971	2.79214049865829e-41	4.45533285081183e-40
comp60875_c16_seq13	5.9790656810943	-0.414687355009171	0.0263873022613638	4.52198499764798	191.501500971473	2.89237044596008e-41	4.60619937818318e-40
comp55906_c2_seq2	7.45691052775815	-1.00653427596863	0.985101301554391	5.21775966122844	191.108020345943	3.5176701296263e-41	5.5910262883825e-40
comp56114_c1_seq1	-9.12911290460255	2.84919506773181	-0.248532491587138	6.99456874518104	190.819956177521	4.05960021902595e-41	6.43974938853705e-40
comp56085_c0_seq1	7.82206399775524	-0.173555655686115	-0.0708618433267764	4.78652934444528	190.213962338104	5.48769034042624e-41	8.68812849599513e-40
comp13957_c0_seq1	7.20187596208122	-1.33974359652971	1.35427372133026	4.96289745425708	190.090166277025	5.83622011598184e-41	9.22191038209529e-40
comp67677_c0_seq1	5.04282314191891	1.06061746527693	0.344059036396897	6.28324834399146	188.856723559074	1.07788253938607e-40	1.69986689966216e-39
comp56367_c0_seq2	7.39419348629969	0.497858176333523	-0.750032826131035	4.53023378158179	188.463012812926	1.31104080138588e-40	2.06355276427843e-39
comp56796_c4_seq4	-3.77305433643132	-0.0987846173769318	-0.625800969296835	4.57492867416304	188.430845914605	1.33218482517142e-40	2.09276941721697e-39
comp61279_c1_seq3	6.3756037601106	-1.09794685260523	1.14679751124414	4.33744922331182	187.954815529102	1.68806685702179e-40	2.64670598510999e-39
comp60358_c0_seq2	2.93709315889006	0.35531396691576	-0.390256500507928	5.91496749263561	187.729933301091	1.88783901667104e-40	2.95421294770955e-39
comp60981_c0_seq2	6.30226635746426	-0.0239607763126942	-0.451674720828963	5.56678227383592	187.722168190733	1.89514411835809e-40	2.95993029352807e-39
comp56625_c0_seq1	-8.57602884833096	1.98173524827684	-0.265442550043332	11.0983448516193	187.544153223289	2.07058873289078e-40	3.22772928246398e-39
comp54554_c0_seq1	6.77094796407582	-0.615755053998832	-1.62433041482289	5.08903300987298	187.199248167892	2.45806584794321e-40	3.82439189317229e-39
comp50870_c0_seq1	6.00959184658818	-0.942739327102141	0.870064497621369	5.1788449899849	187.061457103624	2.63242647969972e-40	4.08782548744174e-39
comp47424_c0_seq1	5.33475179304614	-0.133952988443184	-1.68549058838368	5.10165347238219	186.565976734934	3.36805039768685e-40	5.22015612306876e-39
comp54191_c0_seq1	5.29462118565082	-0.828399015385016	2.04255494265715	5.55264990360971	186.527212237129	3.43361452935542e-40	5.31161820132729e-39
comp60677_c5_seq2	7.30866226646282	0.42405267353984	-0.125948680689349	4.64889814334022	186.359225839528	3.73280871688269e-40	5.76345665886688e-39
comp59237_c0_seq1	4.33917517408465	0.231968514447013	0.975993560220102	4.87892170084523	185.594452859915	5.46035119887484e-40	8.41475414792384e-39
comp59179_c0_seq1	6.8925854160452	1.53849439387727	-1.52950992652695	4.63334016120777	184.207560247557	1.08835117087327e-39	1.67403692430716e-38
comp61200_c0_seq2	7.48163107998571	-0.128435177414345	-0.492907968727756	4.37752171566671	183.43924620751	1.59480813866722e-39	2.44839294924933e-38
comp43925_c0_seq1	-6.76568768567612	1.18968228749438	-0.545554615972005	11.1908358205619	183.399903968258	1.62631783669709e-39	2.49204770969124e-38
comp58892_c0_seq1	3.68642325727318	-0.432045929814365	0.458267913166563	5.68100538996374	182.221969202991	2.9215046870759e-39	4.46824848932778e-38
comp54936_c1_seq1	-5.39463299287801	0.835168033466088	0.378350656842583	6.32885213437074	180.965544366201	5.45694571247912e-39	8.33032051701614e-38
comp56590_c3_seq1	2.77020074078615	-0.535618066079191	0.0747904719996633	5.84689257509549	180.489002211445	6.91612933590485e-39	1.05379970670761e-37
comp54489_c0_seq1	7.74353191755182	0.307057453186733	-0.0602988782832098	4.93795642179152	180.28326572482	7.66113745068155e-39	1.16512533161772e-37
comp36156_c0_seq1	-1.77537395023005	-0.142417929371836	-0.648461800076118	8.66932132248148	179.090125186238	1.38661000453329e-38	2.10484282710616e-37
comp56023_c0_seq1	-3.43570737778724	-0.060700510229473	-0.12518768190683	4.42960578542808	177.838983533389	2.58303762042697e-38	3.91366410302448e-37
comp57370_c0_seq2	-2.88972734222513	-0.0662748006650054	-0.360567814290316	5.42097679436097	177.810785833659	2.61950801736089e-38	3.961517162076e-37
comp65144_c0_seq1	2.59108215401862	0.404250497370964	-0.248087220971068	6.53914517493163	177.366931308898	3.26636568335676e-38	4.93056987510054e-37
comp93720_c0_seq1	7.25934893062119	0.845988747931405	-0.420257900727469	4.69202420117696	177.177162117337	3.58957295433528e-38	5.408378878781e-37
comp50938_c0_seq1	4.33681234065725	0.0239987764939449	0.763561683538028	5.55251521939695	176.920734269479	4.07769157543625e-38	6.13242447318854e-37
comp35691_c0_seq1	-2.94384560276771	-0.387762741818379	-0.693413721563293	6.86723151545565	176.689786560042	4.5738671240897e-38	6.86588276071688e-37
comp58016_c1_seq7	-3.04185447005239	0.368313088051808	-1.23871512390925	5.51562476207987	176.587512678802	4.81246635666033e-38	7.21069358356537e-37
comp47183_c1_seq1	3.70334265101065	0.580277653135069	0.870389594828255	4.68914741420231	176.049871285744	6.28724376376184e-38	9.40302545185488e-37
comp58865_c3_seq1	7.14280961444057	-0.95379120707828	0.891751395510319	4.94874774211489	175.852959575684	6.93392012669502e-38	1.03510785537735e-36
comp49952_c0_seq1	7.49251108464601	0.257690338738122	-0.603874195117642	4.5433452150028	175.410859949768	8.63851451216323e-38	1.28720218080138e-36
comp54476_c0_seq1	7.41081558633729	-1.12026433274679	1.29610090741963	5.20577269196019	175.285322912849	9.19486526171411e-38	1.36758858369641e-36
comp49981_c0_seq2	7.30974344068559	0.0432546249591736	-0.048219128403912	4.45490978569895	174.507711185827	1.35346491085338e-37	2.00937482919001e-36
comp54391_c0_seq1	-1.44394359721003	-0.248152758678999	-0.162158079573916	9.81586803699186	174.314898779919	1.48962973330461e-37	2.20748420807444e-36
comp57484_c0_seq5	7.5549822635128	0.21540837109421	-0.481533543278191	4.60247881055985	174.166207450276	1.6039212047709e-37	2.3725155631155e-36
comp54478_c0_seq1	7.47855874538308	-0.185917777027613	-0.0346842652276638	4.51310482860249	173.864876320846	1.86313567568873e-37	2.75092491568904e-36
comp51110_c1_seq1	-1.93472415324436	-0.202248826787448	-0.696079123823043	7.25275045021679	173.501959271681	2.23152788607454e-37	3.28886637173095e-36
comp60707_c2_seq1	2.30845366390227	0.589924748240233	0.647395430825996	6.8034991040014	173.367303925619	2.38602875139177e-37	3.51019039179341e-36
comp36001_c0_seq1	-4.88691057273737	0.986324207671248	-0.864877426040372	5.14914456664533	172.956261022649	2.92700122366018e-37	4.2982376664836e-36
comp50790_c0_seq1	-7.8299646292608	1.94558232497752	-1.15877589706606	8.15545021991369	170.66982595419	9.12135305276478e-37	1.337028713304e-35
comp59365_c0_seq2	7.21744319227313	-1.47339971875576	0.969215856446484	4.77941558136104	170.5436806794	9.71164183515214e-37	1.42098499486901e-35
comp59326_c0_seq9	7.92437577741303	0.501314590224129	-0.822108360923278	4.94763946616164	169.927730749511	1.31907008175218e-36	1.92655533021318e-35
comp61110_c1_seq6	7.26682898861877	0.170542660560966	-0.48843595246289	4.34528627732759	169.43880765735	1.68196801412755e-36	2.45216415872624e-35
comp58070_c2_seq5	4.51472315427788	1.11121438416552	0.0806029981956861	4.47678994690234	168.57962448035	2.57807723405871e-36	3.75186607886534e-35
comp49230_c0_seq2	7.21999959257944	-0.10383753040929	-0.163959220551894	4.2938608167117	168.459330380142	2.73693357607141e-36	3.97591103362631e-35
comp54500_c0_seq1	-3.61368255200257	0.444388756520973	-0.225640500825138	7.15876019421373	168.433868020591	2.77179366333929e-36	4.01934873614102e-35
comp54206_c1_seq2	6.69772852566665	-1.56250146980583	-0.5850389154298	5.25479382641485	168.336026098774	2.90992836424196e-36	4.21212130724023e-35
comp56300_c0_seq2	7.10863922217435	-0.117900090297345	-0.257654404411747	4.16118138319345	168.080414446739	3.30416356445757e-36	4.77425131078308e-35
comp54946_c5_seq1	-2.67416452967102	-0.663584080684436	0.397695373234454	5.2893929943309	167.597555907508	4.20044727058788e-36	6.0585098888586e-35
comp58233_c1_seq1	2.90107204855873	0.738053332541604	0.728684338179923	5.94988340620192	167.591055684509	4.21404063743119e-36	6.0673203209622e-35
comp54357_c0_seq4	6.65660708341352	0.773591893025547	-0.0703560005282262	4.28226100944158	167.507355316353	4.39305679693923e-36	6.31385077943074e-35
comp56162_c0_seq1	-3.07191023520407	-0.608673786638714	0.447456763020285	4.87365022556923	167.415643101385	4.59795106610147e-36	6.59663563572009e-35
comp50779_c0_seq1	-1.98486489861991	-0.207723232871065	-0.0979169181057452	6.81897455485606	167.044896964039	5.52834440997889e-36	7.91744872566942e-35
comp58825_c0_seq2	-4.9386162057663	0.429429724919816	-0.251242610953355	5.26537673908642	166.782093067909	6.29976516392573e-36	9.00633093805678e-35
comp60397_c0_seq2	5.2412378691556	0.149450411771889	3.30972485199834	5.56671133250462	165.459349902932	1.21575422307755e-35	1.73247829232544e-34
comp85621_c0_seq1	-7.90485625537572	2.94712613212478	-1.07662916915267	4.93964336951339	165.458758373668	1.21611170532097e-35	1.73247829232544e-34
comp71409_c0_seq1	-2.22195117959191	-0.191769666566597	-0.392153889367526	5.27324231682037	165.144505252721	1.42168950299433e-35	2.02179212478457e-34
comp54499_c0_seq1	7.32016133555359	-0.159698430934765	0.0101341585394389	4.40847554227927	164.81838982261	1.67184381653085e-35	2.37337407649721e-34
comp56508_c0_seq1	-2.19594751084408	-0.518048265051659	-0.418011711145182	6.96397432696057	163.793810278643	2.78190582027819e-35	3.94233017118444e-34
comp66291_c0_seq1	-2.23463351212877	0.0924604332565407	-0.123814601761089	6.52752439976928	163.757345496417	2.83278022357194e-35	4.00741998119967e-34
comp58262_c1_seq3	-2.25522538812603	-0.453858815520864	-0.249997802612724	4.81970164971232	163.640868983099	3.0015997666816e-35	4.23884454855767e-34
comp61200_c0_seq4	7.16106414573599	0.6820427347179	-0.187644259456344	4.60492071836257	162.844603880703	4.45874972125604e-35	6.28567395486982e-34
comp46076_c0_seq1	-4.63293112728207	0.296553554049121	-0.471058471773197	3.72316256789133	162.334228444275	5.74600912904049e-35	8.08631076388927e-34
comp50699_c0_seq1	5.33532651272994	0.799207592602973	0.671227539037571	5.00564282477963	162.033191152007	6.67325240946433e-35	9.37493657385058e-34
comp54862_c2_seq3	-7.49471725022285	2.32149871347075	-0.482170916488346	4.27768496125847	161.620349269517	8.19290234557584e-35	1.14899076839512e-33
comp64489_c0_seq1	-1.92347348349937	-0.411316423240858	-0.378635939039563	5.84222289202698	161.572770829279	8.3889218440515e-35	1.17444905816721e-33
comp47661_c0_seq1	6.34685352663278	0.302600598232897	-0.397418417124789	4.98747785618775	161.00198112733	1.11401858839817e-34	1.55693701337165e-33
comp58169_c0_seq1	3.41581279428192	-0.173127534280728	0.342121312894055	5.01380248343691	160.43641788229	1.47553032710694e-34	2.05863146842148e-33
comp59327_c0_seq1	4.32842183802132	-0.0779372485248412	1.49961786498371	4.57735917097859	160.379913347239	1.51754783412831e-34	2.11361559165705e-33
comp50598_c0_seq1	-3.94791324848175	0.0980575576320469	-0.10114667677211	4.89081189697742	160.263578536638	1.60786111753542e-34	2.23556127251151e-33
comp58438_c0_seq1	7.41174812194624	-0.242534958587289	-0.0487321011961122	4.42197139274457	160.086615062001	1.75565305705206e-34	2.43687049323014e-33
comp35493_c0_seq2	7.04762396789845	0.477616005222991	-0.417181916770619	4.34116008733313	160.077244189519	1.76384736530233e-34	2.44405927233174e-33
comp58221_c1_seq1	3.96303486646633	0.000708578119084165	0.203996021556689	5.23912342569808	160.04097204045	1.79592746510549e-34	2.48426416930804e-33
comp35692_c0_seq1	-2.09340721250713	-0.170603197278056	-0.221087710864585	6.59786816298423	159.626968121662	2.20613991618341e-34	3.04650258272278e-33
comp60981_c0_seq3	7.33492470068701	-0.139597831834279	-0.139309917747811	4.37310372173656	159.238644334577	2.67567960269572e-34	3.68861545228767e-33
comp59392_c0_seq1	4.22236322279073	-0.477871738333294	0.448391332027766	5.09814214946127	159.11239531128	2.84890934888027e-34	3.92075707674422e-33
comp18359_c0_seq2	7.07869423009455	-0.00056210850841695	-0.285067968254166	4.18961616761369	158.444044952608	3.97105883994264e-34	5.45583100958899e-33
comp55050_c0_seq2	5.14544756891587	0.283464526514827	-0.758223961216332	4.59706749336989	157.647641636294	5.89878374174397e-34	8.09061607623969e-33
comp35772_c0_seq2	7.19437167376375	0.6040387193107	0.431649729782758	7.57755694302452	157.639477855933	5.92275968705187e-34	8.10977872014231e-33
comp49753_c1_seq1	-1.90827681018436	-0.230489963997327	0.0484541520984564	6.18184324947295	157.424353598134	6.59090286599811e-34	9.00941966809117e-33
comp54456_c0_seq4	6.83453441285157	-1.11091252885132	1.30722068895532	4.74985012574788	157.24191440215	7.21626415961939e-34	9.8476493733796e-33
comp58717_c6_seq2	4.5943671551214	0.0135194370243872	2.46766743154508	4.25787868948326	156.997622070271	8.14753851689763e-34	1.10998230618441e-32
comp61279_c10_seq1	5.6073690075932	0.772744607649199	-0.903828450149414	5.19593279075536	156.573338328374	1.00595416007195e-33	1.36816517139987e-32
comp54401_c0_seq1	-7.98838622482939	2.95676518823161	-0.768091456323332	4.7014851278277	156.438141835265	1.07584698608588e-33	1.46077314392163e-32
comp61069_c0_seq1	-3.78672800783464	-0.376975091377584	0.444274651448404	5.99555784794393	156.296455617221	1.15431141090355e-33	1.56469035063281e-32
comp47853_c0_seq2	6.94791017118049	0.438019957613362	0.346419591708187	4.52325751662101	155.853546995592	1.4384371912732e-33	1.94657293363281e-32
comp35863_c0_seq1	7.21774385454884	-4.38872966143141	4.19923876181324	5.54720597277557	155.698905268962	1.55330978330211e-33	2.09852151724115e-32
comp58459_c0_seq1	3.16508502465238	4.40706098471188	3.60030745346216	5.09934188912182	155.347626864064	1.84949403540705e-33	2.49450892695667e-32
comp54169_c1_seq2	-2.18862426799771	-0.443958354343169	-0.113799455376193	6.00500626989999	154.932442906473	2.2731872388657e-33	3.06087304954243e-32
comp52915_c1_seq2	-1.51098512581508	-0.045484395660302	-0.629652789882185	10.4224984442788	154.401349322584	2.95954220049898e-33	3.97844926654141e-32
comp61279_c9_seq2	6.96880478046964	-1.09529545139595	1.15933095163729	4.79968465050178	154.012980010048	3.58936758704338e-33	4.81712146698239e-32
comp59034_c0_seq2	-4.90667616307068	-0.175257373138435	-0.630049406897544	4.20181692490483	153.761959618269	4.06608664545973e-33	5.44788402447877e-32
comp61402_c3_seq63	-3.70390717008211	-0.741692921182672	0.417268020027399	5.06621535754654	153.412424637321	4.83714730315633e-33	6.47028317481604e-32
comp56388_c0_seq1	6.67139317519736	-1.75884291866814	-0.751658828005608	5.03858842602352	153.01599005216	5.89005466284379e-33	7.86569738006783e-32
comp59767_c0_seq1	7.22643533301273	0.0390179071974002	-1.08360912353861	5.38126814197725	152.669822403723	6.9952490237566e-33	9.32623167542287e-32
comp35801_c0_seq1	-2.00408056454872	-0.50642697332851	0.200319821835355	7.53423560767755	151.796314312239	1.07957574980627e-32	1.43695254974214e-31
comp57393_c4_seq5	-3.8025365633446	0.72575118483062	-0.733273141680927	5.53880053078218	151.197072386924	1.45388163179973e-32	1.93199418153584e-31
comp56848_c2_seq1	-1.74273577365216	-0.433669077895817	-0.452553218239447	6.2546149927107	149.517813119999	3.34797323796733e-32	4.44168102568956e-31
comp56336_c0_seq1	-2.39286450087547	0.330983268329239	-0.639766867152293	4.89662154441756	149.389012576569	3.56915966244472e-32	4.72601295679063e-31
comp59990_c0_seq3	-3.76411830070132	0.273078019332767	0.0629318321947376	4.24682379413464	149.386310802941	3.5739525567637e-32	4.72601295679063e-31
comp50986_c0_seq1	1.8777498001792	-0.0432123707732191	0.322986029255183	6.4593959787662	149.247630306779	3.82881021405366e-32	5.05473523052983e-31
comp60863_c1_seq1	7.78687726660232	-0.560295266193465	0.060395784055155	4.70370133314948	149.244370912416	3.83501377593862e-32	5.05473523052983e-31
comp50549_c1_seq1	5.27446261620243	0.699551002955785	-0.130429738084335	5.38238158803084	149.062326883573	4.19793528815965e-32	5.52410120873736e-31
comp60981_c0_seq1	7.11043367122508	0.149713784059879	-0.211939660189568	4.30362468497934	148.901169204262	4.54777408337122e-32	5.97475797727829e-31
comp35941_c0_seq1	3.86447161534807	-0.0183820152511652	-0.476592392690729	5.58904367361619	148.698063806045	5.03048858513025e-32	6.59824279467084e-31
comp58005_c0_seq2	4.93196424327112	1.96253778320203	1.49259481225078	4.37989046103489	148.374240251239	5.90827097905789e-32	7.73706697192944e-31
comp58451_c0_seq2	-3.64281099849914	0.350240283329255	-1.22766544825744	4.79575002568774	148.159295833489	6.57391908783195e-32	8.59486905257513e-31
comp58575_c6_seq15	8.98215033980597	-2.34392424825389	-1.22292804833091	4.90575774774132	148.071418931691	6.86719615950063e-32	8.96384735409213e-31
comp60072_c9_seq1	3.38459191864055	0.145467763989325	0.201014965396817	5.29305881908622	147.755499519895	8.03383369582978e-32	1.04698160672663e-30
comp46951_c0_seq2	7.01555178766368	0.225305358924093	-0.204327696598842	4.25351784208145	147.306200259854	1.00423280980268e-31	1.30663100421517e-30
comp57856_c0_seq1	4.18058390286791	0.769625574411413	2.00142574823056	5.34889875981779	147.145136796108	1.08786373483157e-31	1.41317683245909e-30
comp59226_c0_seq3	-3.91380801265263	-0.243117733742975	0.151570259358044	4.12351053253535	146.866375033646	1.2493973176437e-31	1.62041834509117e-30
comp50663_c1_seq1	-2.03989850309226	-0.568379263611854	0.111375566299419	6.88461113467833	146.632352891563	1.4033828702753e-31	1.81722388920951e-30
comp59816_c0_seq7	3.96874184497876	0.762764531753918	2.97102748274229	4.35200949839626	146.557143836948	1.45679249109195e-31	1.88337478991887e-30
comp35716_c0_seq1	-1.66347107950768	-0.0518481179815588	-0.294992738214672	9.72860953321898	146.262773848045	1.68612037656936e-31	2.17638404020243e-30
comp58162_c0_seq1	6.67321845511592	-0.971307930253464	0.935350947754711	4.5533659866231	146.19513550467	1.74372085263186e-31	2.24715440881301e-30
comp14092_c0_seq1	3.7282731701373	-0.530418916332413	0.618922210972581	5.55647519732934	146.156566546776	1.77744256961704e-31	2.28697610624059e-30
comp54357_c0_seq1	7.14206600452275	0.256354015848519	-0.0949199963464635	4.36002785742901	146.068318871706	1.85707278347845e-31	2.38302959319061e-30
comp35711_c0_seq1	-3.46275695723936	0.0800816322314597	0.0739215142792447	9.78228037568968	146.067340622891	1.85797520712616e-31	2.38302959319061e-30
comp56941_c3_seq2	-1.95510335809628	-0.0355284464685431	-0.923702005196728	6.11676400344282	145.855541460764	2.06405209905166e-31	2.64316055527848e-30
comp20162_c0_seq1	-1.52228423989142	-0.320827875002178	-0.540165433453841	8.07049285397179	145.725287053087	2.20198137623849e-31	2.81534085737999e-30
comp60156_c1_seq1	-7.51936165502253	1.72642358921594	-0.0427140295430424	4.19499087733779	145.720330828	2.20740786688685e-31	2.81783435732044e-30
comp51340_c1_seq1	5.24747448618566	0.330568943627182	0.530034215307879	5.20698667971716	145.577625600091	2.36952195541327e-31	3.02002279411635e-30
comp60875_c16_seq12	6.30565027827978	-1.72128122771593	-0.962333719132115	4.76838830840524	145.187322724048	2.87633073147274e-31	3.6602098758741e-30
comp56264_c0_seq1	3.77977888292156	0.954426853576605	0.282984544394152	4.51459665311085	145.172999321161	2.89686311740981e-31	3.68055994196299e-30
comp56723_c1_seq2	6.39419312919435	-0.89682298710008	1.03772913167128	4.39424494282454	145.029559421689	3.11074055525468e-31	3.9461131362902e-30
comp57457_c0_seq1	6.65465266439817	-0.831206415550657	1.05518469809602	4.64397813421811	144.894356158864	3.32677183216213e-31	4.21356444867284e-30
comp58980_c0_seq1	7.05249742308781	0.0347758798163483	-0.471394590286304	4.13817384261857	144.844408451744	3.41032028081395e-31	4.31264527243025e-30
comp56136_c0_seq1	4.22704867803132	-0.470311754736996	-0.58852968711786	5.19941884746133	144.442855490452	4.16290613378903e-31	5.25615531471867e-30
comp56048_c1_seq6	-2.1446305226785	-0.0989758202696055	-0.41680143060873	5.16536554326387	143.592176585922	6.35117389956484e-31	8.00662762517459e-30
comp57721_c2_seq1	-5.29233821797722	0.371312495988699	0.160263894643475	5.62572560131506	143.370249633388	7.09109898371875e-31	8.92553545994165e-30
comp17445_c0_seq2	6.5768138452077	0.890961940323215	-0.255291448396477	4.24031305938983	143.14793116222	7.91875700393353e-31	9.95185182540856e-30
comp59801_c0_seq1	-2.96181439098963	-0.0176868004220673	0.300243011865713	4.95000449690918	143.112270895374	8.06022535127103e-31	1.01139607890717e-29
comp58449_c0_seq1	7.47439561524466	-0.536475841704486	-0.621097472003252	4.17266538689838	143.018192344359	8.44569207454899e-31	1.05812642899991e-29
comp52434_c9_seq5	-1.92728627122964	-0.17105057703516	-0.248236751547541	6.04191443724302	142.673007335385	1.00247529383157e-30	1.25402233515413e-29
comp58448_c2_seq1	-3.52539727515679	-0.426193836094193	0.277596266522219	4.20595896170996	142.286435780951	1.21460640830664e-30	1.51704153247051e-29
comp60471_c3_seq11	-2.13592209716944	0.229210484211821	-0.454884522577135	6.69007491156317	141.272598201461	2.0093531486509e-30	2.50581794199449e-29
comp37037_c0_seq2	3.98774527833695	0.572091951763617	2.434749383705	4.38864546282185	141.238247940082	2.04391703351541e-30	2.54500637076435e-29
comp60992_c0_seq1	-2.54666628280145	0.165699725813816	-0.257179699988251	5.1710577966184	141.176064850884	2.10800604059011e-30	2.62078174310175e-29
comp56579_c2_seq1	-1.85277231495484	-0.185992797373955	-0.360584049615981	6.09713848008759	140.266190680899	3.31179940697936e-30	4.11109433276795e-29
comp36514_c1_seq1	-1.94706849237838	-0.144994083543282	0.0143326556397733	5.37975664187656	140.137517795344	3.53027452714742e-30	4.37559714328088e-29
comp59748_c0_seq2	6.68353847024766	0.50175425184394	0.161087618258574	4.25915996429078	140.067785214099	3.65463616784975e-30	4.52282149260917e-29
comp36097_c1_seq1	-1.60738181053072	-0.134871440514539	-0.332625944963935	9.38091073532073	139.453613870469	4.95757037029674e-30	6.12592460695508e-29
comp16260_c0_seq1	-1.58855048982392	-0.139925988666942	-0.661002257039767	9.9170791387104	139.319702037744	5.2983639271403e-30	6.53706818773201e-29
comp57417_c1_seq1	-7.51222929548325	0.703189458749786	0.570156572717863	3.77220124088176	139.205090775609	5.60858244013317e-30	6.90929624007894e-29
comp50564_c0_seq1	-3.10665359403514	0.169482788845996	0.351787905225243	4.88686998062343	139.002934088459	6.20068603555222e-30	7.627126100787e-29
comp58771_c1_seq4	5.03272127815859	-1.22655910408512	0.859575613247231	4.78758867271816	138.891515412892	6.5533343813689e-30	8.04868613566307e-29
comp60297_c0_seq2	-1.70805014254899	0.133323396769377	-0.249982654850123	8.77205216931929	138.574576275915	7.67000611797006e-30	9.40591067961653e-29
comp60739_c0_seq1	-1.96116651448488	-0.559826804573306	-0.082475728875984	4.9496855327759	138.451442017603	8.15349230402642e-30	9.98371731366135e-29
comp59767_c0_seq2	6.76683528935125	0.247529921136273	1.36220448889788	4.7964680215252	137.998531851937	1.0209169821286e-29	1.24819804783325e-28
comp61432_c2_seq3	3.81730642063244	-0.68127379782771	-0.0122886403250366	4.66787819866494	137.788342522441	1.13319895512528e-29	1.3833901702177e-28
comp35542_c0_seq1	4.72294034551959	-0.383006196818636	-0.520887462862478	4.99566631528166	137.737040220002	1.16242944726798e-29	1.41694031572244e-28
comp61293_c1_seq2	-5.41047455850044	0.304961499859317	1.12578483690552	4.85805175352704	137.520798830153	1.29415560490651e-29	1.57513893894477e-28
comp48559_c0_seq3	6.89120611356425	-0.370569815061066	0.0954910587966007	4.03988125794437	137.446928596735	1.34249353464446e-29	1.63152212771034e-28
comp58488_c0_seq1	-1.28806458198588	-0.589842900340389	-0.22356336198862	6.58993285888677	137.292458811242	1.44948655754445e-29	1.75891287955917e-28
comp51097_c0_seq1	-2.24693000688992	0.423928608972527	-0.0707560407006202	6.40627792806649	137.115116897444	1.58287577154998e-29	1.91790597969868e-28
comp15844_c0_seq1	-2.39861889885152	0.190681308000883	-0.192980047334534	7.96568081156746	137.039368280627	1.64352817347067e-29	1.98842378718705e-28
comp57393_c4_seq1	-2.76405580202808	-0.431779252807673	0.478985834337055	5.34528831932812	136.968965847919	1.70198158154737e-29	2.05607491803621e-28
comp50970_c0_seq1	-1.35228333827387	-0.187404709385203	-0.16767735419224	7.13282371203445	136.750721158948	1.89672673169595e-29	2.28792662010824e-28
comp59086_c4_seq4	7.25451646209185	0.051062833468474	-0.442717096990132	4.26791440907163	136.574543755769	2.07007117540246e-29	2.49331306802561e-28
comp58116_c1_seq2	6.97088853282625	0.26850603148604	-0.0519806705377717	4.27260027939682	136.51180009436	2.13555882614805e-29	2.56837386420713e-28
comp50976_c0_seq1	-7.02082101108506	1.33747017503826	1.87548420508786	3.9558733382171	135.483578196446	3.55769691726881e-29	4.27239869798236e-28
comp47559_c0_seq1	-2.23764827370517	-0.373903116613314	0.0139663339498193	5.30663004191179	135.319865910271	3.85886747497815e-29	4.62721593967055e-28
comp50311_c0_seq1	-8.3070037364164	2.34692442210632	-0.897949308999747	11.370396293385	135.256659208093	3.98185133340311e-29	4.76763469845873e-28
comp55050_c0_seq1	3.72511320415233	0.792633593781966	-0.418030611859726	5.45362016284256	135.166777193434	4.16351768014346e-29	4.97779857156974e-28
comp54981_c0_seq1	1.9709822532472	0.373080336967327	0.0550567901560964	7.44488272849905	134.996860225137	4.52989593957002e-29	5.40785515260009e-28
comp58985_c0_seq1	7.18194070532454	0.131128007976647	-0.286265480269146	4.30878018716934	134.232833016606	6.61881260875029e-29	7.8900139715485e-28
comp50891_c1_seq1	-3.03077248375371	-0.0218147324357995	0.487224632100194	4.51946086841596	134.191121109001	6.75726899304609e-29	8.04323384106191e-28
comp60386_c4_seq2	8.11405962080357	-2.84729320240683	-2.0349570516178	6.0064963045788	134.000138926662	7.42912572212557e-29	8.8299843260337e-28
comp58733_c0_seq1	7.17693572916609	0.206797319732537	-0.19846130794414	4.3639649168698	133.584716323086	9.13021915125479e-29	1.08359526266576e-27
comp53996_c2_seq1	-2.52789527010636	-0.127920765548451	0.357802546235804	5.66574031014792	133.483409892854	9.60101807652032e-29	1.13780486152447e-27
comp61367_c1_seq1	7.17675664198967	-0.479388287875889	-0.0895588063908889	4.13311366280283	133.382548394592	1.00938616839069e-28	1.19446485853649e-27
comp14298_c0_seq1	-4.10516391803288	0.104223901852902	-0.0884152829261958	4.12831416314206	133.225349931885	1.0912901853511e-28	1.2895041169761e-27
comp58260_c1_seq2	3.72961661465552	0.533631538890357	0.484996505482304	4.96440051663164	133.206500858069	1.10154691921327e-28	1.29820801787738e-27
comp49445_c0_seq1	-1.59092916953135	-0.409634686123301	-0.62208800319887	5.91167236360387	133.205929617884	1.1018592601772e-28	1.29820801787738e-27
comp58429_c1_seq1	-2.88002352242386	-0.329722480389011	0.0739682400152443	4.82925771566984	133.180575530998	1.1158118461334e-28	1.31273887151775e-27
comp59301_c2_seq3	4.53712217536833	0.375291008194728	-0.25595764592841	7.69212523608842	133.135774110203	1.14089975368231e-28	1.34030918889113e-27
comp53988_c0_seq1	-1.58551491513352	-0.218378173300139	-0.00627851212859775	8.95191072531519	132.813298265686	1.33891612099616e-28	1.5706590559761e-27
comp56109_c0_seq1	-1.76031815971507	-0.378861349397876	-0.216978856040301	5.11994076007575	132.594614585183	1.49240730122909e-28	1.7481869340698e-27
comp53958_c1_seq1	-2.48067774013209	-1.36964364711076	0.39898347410121	5.36519430588009	132.553085626682	1.52348522170583e-28	1.78201604720743e-27
comp35722_c0_seq1	2.03451640773322	-0.163348266928176	0.294421725228523	9.00219808597667	132.359676491216	1.67696545371049e-28	1.95871498094772e-27
comp66812_c0_seq1	-1.67632746426953	-0.257411100912981	-0.191333293102921	5.66934951750618	132.293813464693	1.73268496704318e-28	2.0208840781082e-27
comp60310_c0_seq2	7.62885773941357	-0.116251230807859	-0.859584775480875	4.37941115093347	132.235946511638	1.78316552038935e-28	2.07677294659139e-27
comp47038_c0_seq1	-1.2471350910725	-0.553973502654405	-0.135156616030412	6.29037580096857	132.128909357422	1.88044763353324e-28	2.1869309207203e-27
comp57241_c0_seq1	2.29715713773943	-0.190948814647393	0.295113998999459	6.96354372274416	132.120395965167	1.88840924857685e-28	2.19304374913524e-27
comp61691_c0_seq1	-1.47444212230806	-0.175524924519466	-0.311485084944889	9.8645586709593	131.892836288887	2.11417674588884e-28	2.4517191276359e-27
comp60014_c1_seq3	-2.76006547270383	-0.050822224897259	-0.0736678369297748	5.91627889324996	131.865984418311	2.14253805184483e-28	2.48105906403631e-27
comp60473_c5_seq1	7.24805377350932	0.439402129989901	-0.142159785637054	4.55526190790868	131.836451633032	2.17417045753689e-28	2.51409782151127e-27
comp54152_c0_seq2	6.50036122814589	0.586134736701728	0.301319669086935	4.16023468220901	131.335896242273	2.78723802608327e-28	3.21842613097307e-27
comp60175_c0_seq1	-4.23804431995496	-0.327383357998963	0.361153538299233	3.86865538648822	131.142917763917	3.06735654514068e-28	3.53684098931868e-27
comp59096_c0_seq4	7.47553148339455	0.343272709647392	-0.0740652478731362	4.74295418051985	130.951164814204	3.37357126105168e-28	3.88439895484161e-27
comp51224_c0_seq2	-1.60258008258779	-0.581451350942824	-0.803574635798719	5.54707296729879	130.934456034845	3.40165965169204e-28	3.91118484207314e-27
comp47474_c0_seq1	-3.63830621713882	0.126731404845122	0.290706414360359	5.42256715254951	130.624541181322	3.96717285491201e-28	4.55494379063977e-27
comp60767_c0_seq6	4.27197238802472	-0.996539227184431	0.671683750243449	4.87289377540001	130.249578515984	4.77846450505308e-28	5.4786751453975e-27
comp61138_c0_seq1	-2.58502447922227	-0.204659870997423	-0.504056586143026	5.12856165784823	130.225440471762	4.83604387733268e-28	5.53686040531903e-27
comp57313_c0_seq1	-1.88242000023353	-0.341779133254006	-0.281434917406658	7.18010404536479	130.105979960188	5.13138332232915e-28	5.86671272366715e-27
comp48624_c1_seq1	-1.77010590195181	-0.478936261764163	0.0774615458471021	6.04058718451679	129.997595625236	5.414914072938e-28	6.18215401059654e-27
comp48418_c0_seq1	-4.07673208178027	-1.54853604604325	-0.407531904485192	3.57788955594762	129.699172777445	6.27916254299766e-28	7.15877518615176e-27
comp60875_c16_seq4	-1.8009207604856	-0.0684868073082004	0.0755809536044439	8.70073415007366	129.242875560251	7.87465737760386e-28	8.96516470545742e-27
comp60037_c0_seq1	-3.54042187831927	-0.614740952500831	0.154798353090447	4.18651683144739	128.827233563477	9.67828287918264e-28	1.10031081372587e-26
comp58215_c0_seq1	-2.23527842309115	-0.106993944100418	-0.0642681222882141	4.83689847969201	128.57548891647	1.09659350822202e-27	1.24495615933441e-26
comp60327_c0_seq1	-3.10321987805288	-0.490533407580108	0.546743354632822	4.6173670731393	128.031793815826	1.43615529486371e-27	1.62817829652661e-26
comp60484_c0_seq1	5.04188197000265	0.957707648985561	0.536819661358062	4.77977885707071	127.774264477473	1.63189664769617e-27	1.84750757349513e-26
comp54618_c0_seq1	-2.09463199661841	-0.581834742382612	0.182387998554906	5.18148809288029	127.22354588151	2.1446484111308e-27	2.42461924973867e-26
comp61486_c0_seq2	-6.98512496734114	1.58022873159701	-0.815821998755502	3.75594099014914	127.007668681796	2.38709738710749e-27	2.69495980778459e-26
comp47016_c1_seq1	-1.61991518230405	-0.318184399754078	-0.00301886311799962	5.89245448384568	126.569128985916	2.96727858673047e-27	3.34530740250865e-26
comp35494_c0_seq1	3.82988884844703	0.587479853858006	0.0544300684583518	4.57850541027971	126.468255940089	3.11955156827608e-27	3.51209514061749e-26
comp56538_c3_seq1	-2.89898185304773	0.0955027167722911	-0.827488184280681	4.97254354456055	126.267219853458	3.44672383224262e-27	3.87505456090966e-26
comp60112_c1_seq1	7.21482871236108	0.528332378545521	-0.256345222818763	4.51959347439663	126.04506139948	3.84831942660629e-27	4.32056471912335e-26
comp59621_c0_seq1	-7.23698129357539	2.02146182434204	-0.956324546499792	4.40935612301347	125.73720019615	4.48331797200587e-27	5.02652496280492e-26
comp37062_c0_seq1	-2.33623881546827	-0.316119620781656	-0.206534832741868	4.59549281551706	125.662377736529	4.65285785541684e-27	5.20940135027747e-26
comp57076_c1_seq1	-1.55818588403679	-0.749111152089835	-0.41065460430226	5.61477518681023	125.570675815631	4.8694123071186e-27	5.44433878089702e-26
comp54675_c0_seq1	-1.68917706451195	-0.0262412164737544	-0.178451855114596	6.78115325295266	125.209038879345	5.82624167344903e-27	6.50516735605755e-26
comp53919_c0_seq2	5.17308483338254	-0.0141510542176925	1.82590081550804	4.46800214878676	125.148408485914	6.00413825444741e-27	6.69457285977313e-26
comp51164_c0_seq4	7.14451840167458	0.438244312124935	-0.238925641039747	4.43146311477018	124.931113973658	6.68750507037914e-27	7.4462796841337e-26
comp54778_c1_seq1	-3.76578323289442	0.593863945680571	-0.297190762907211	4.02205251275768	124.854722225119	6.94578985249191e-27	7.72326098001363e-26
comp59280_c0_seq2	-3.44989696137445	0.277701013501959	-1.54911336035516	3.63010305199551	124.823314190125	7.05485400479978e-27	7.83378720039822e-26
comp45644_c0_seq1	-1.37103370536867	-0.430402339196799	-0.29900406427101	9.80027333749538	124.70500123865	7.4812930486612e-27	8.29594547913101e-26
comp56689_c1_seq1	-1.81737159215434	-0.522661238111049	-0.394024746655396	8.79547423669867	124.431749551204	8.56729368482178e-27	9.4872244001592e-26
comp51115_c0_seq1	6.10345694317475	0.97970385809486	0.218640069797237	4.03266059766911	124.300928890937	9.1416832854597e-27	1.01094794968535e-25
comp58237_c0_seq1	5.02564240425053	0.0439760579577628	2.15622716526041	4.44978930537573	124.292031347019	9.18211966421562e-27	1.01403626700452e-25
comp35660_c0_seq1	1.9901907969856	0.726288708820353	-0.564532370685435	7.51315027438858	124.003715095592	1.05938462710928e-26	1.16834990304052e-25
comp58872_c0_seq3	8.82272798363314	-0.139427417461682	-1.04673879546008	5.27814327312957	123.50647921679	1.355714864663e-26	1.49312835502151e-25
comp52915_c1_seq1	-2.27433836162221	0.192015433520837	-0.358784799769671	6.20041067071502	123.070360943015	1.68311686576779e-26	1.85120017827866e-25
comp60243_c2_seq9	-3.0686508246313	-0.921942932053774	0.82796776335912	4.9280634390936	123.006343332732	1.73741805193079e-26	1.90833478712073e-25
comp54537_c0_seq2	-1.93186686696542	-0.28657572288616	-0.014874728039874	5.60182242641579	122.922203953487	1.81145995790149e-26	1.98696812161698e-25
comp59640_c0_seq2	-2.83070425644135	-0.217682025597919	0.170943442725184	4.62003638461425	122.856433743805	1.87152739185585e-26	2.05008122140318e-25
comp36126_c0_seq1	6.97795903903951	-0.191759377518014	-0.0292387622354902	4.11432840645168	122.712333215006	2.01018685076808e-26	2.19899792339083e-25
comp16497_c0_seq1	-1.69143595661854	-0.206056973822503	-0.232583586112206	6.39954454291231	122.12340980964	2.69210216466924e-26	2.94099462894998e-25
comp70749_c0_seq1	-1.97182934274329	-0.00443762815527631	-0.681895059787871	5.74722072475925	121.542688338084	3.59066714366985e-26	3.91735502915044e-25
comp55377_c0_seq1	-1.52431237075977	-0.076686155112691	-0.199887955656713	7.67219777832888	121.490926723718	3.6840373868876e-26	4.0138181529719e-25
comp53904_c3_seq1	-2.69614877217995	0.44917869090948	-1.14767349229815	4.45985155496699	121.472147555225	3.71850907218443e-26	4.04593752203047e-25
comp57192_c0_seq2	-2.48902973298215	-0.00568489784959231	0.226511329134458	5.76015902270007	121.366128753459	3.91925913401689e-26	4.25864806170789e-25
comp56125_c0_seq1	2.92765721014921	0.331742790521436	-0.528699773834351	5.52779131767098	121.241764258033	4.1686011413419e-26	4.52351818630756e-25
comp56760_c0_seq1	-1.44263395997877	-0.0545490041373685	-0.314925045803422	6.53662704983239	121.046816541168	4.59175698506848e-26	4.97604039050335e-25
comp62103_c0_seq1	1.50092901249085	0.449563375153606	-0.178562946702523	7.2147730825081	120.849494180584	5.06382107247452e-26	5.48028486161261e-25
comp62051_c0_seq1	-1.58202713598569	0.0256925314763621	-0.0344823391077216	7.90941337440954	120.648869828812	5.5935615222236e-26	6.04552129321927e-25
comp59816_c0_seq4	4.69253694724041	0.280458059340717	1.05219178957412	5.61826396226735	120.522641814558	5.95490525367471e-26	6.42749160935915e-25
comp57270_c0_seq2	-1.72016075626422	-0.00815992242677832	-0.483044950444595	6.93016151976286	120.064507384658	7.47384182555766e-26	8.05624492526202e-25
comp35914_c0_seq1	-1.67117103632167	-0.619691095421674	0.0274196024399177	6.28574581272327	120.038343805792	7.57144368268118e-26	8.15061387673488e-25
comp50245_c0_seq1	-1.67761918968058	-0.370337266955593	-0.0859057591133048	6.0395352064591	119.735991016749	8.79619897249384e-26	9.45649719775001e-25
comp60557_c0_seq3	-2.33833378916478	-0.182495009703879	0.0182496182374754	6.07176989881918	119.701023420118	8.95005637683245e-26	9.60750429378464e-25
comp46457_c0_seq1	-2.82373004921516	-0.141649613801692	0.137099058620406	4.84604801157507	119.698701698145	8.9603666988665e-26	9.60750429378464e-25
comp59953_c0_seq1	-4.36206795721906	0.878310156526998	-0.36898843391746	4.35010841373209	119.684273356701	9.02470695023311e-26	9.66370865767366e-25
comp57352_c0_seq1	-3.44178383924799	-0.119320973864737	0.395111414192587	7.30916296551492	119.535223922492	9.71700895337137e-26	1.03913027145156e-24
comp60382_c2_seq2	7.19523277058735	0.896987082406062	-0.390270831975993	4.66746109002157	119.226408548518	1.13250068349974e-25	1.20949282482857e-24
comp57721_c2_seq2	2.08937686531671	0.0397119253762862	0.608166672690589	6.29202242841082	119.096983056584	1.20756598909683e-25	1.2879644615288e-24
comp58632_c1_seq1	-1.27618783619223	-0.209159584675199	-0.462010188947184	6.79251193827555	119.041098982123	1.24149707089612e-25	1.32241461980078e-24
comp56796_c4_seq1	2.40707758861858	-0.1309555474169	2.76436978578912	4.80372868769582	119.00488456294	1.2639927226895e-25	1.34460958138072e-24
comp18008_c0_seq1	-2.89219225923702	-0.341721479326664	0.415284782393058	5.87030257318772	118.523151433032	1.60503780513024e-25	1.7051686039824e-24
comp57377_c0_seq1	-3.05587413986659	-0.0648330634087206	0.537788461169116	5.54997715775601	118.48676009566	1.63426304231161e-25	1.73394453154161e-24
comp60184_c0_seq1	3.06722308666744	3.06054797988003	0.760981064139268	4.97593476422297	118.432942094047	1.67846141465964e-25	1.77851087937661e-24
comp15495_c0_seq1	-1.59235742136403	-0.244721226091059	-0.0889094277306567	7.90539660327837	118.029662939737	2.05000001610277e-25	2.16908024273309e-24
comp16436_c0_seq1	-1.43857818901692	-0.229203873011152	-0.253631856315725	6.32722974414203	118.027292160061	2.05241123387155e-25	2.16908024273309e-24
comp54433_c0_seq2	1.96334264755068	0.346169638311692	-0.133755241097093	6.06478418065925	117.879459419516	2.20850406128429e-25	2.33100702093365e-24
comp37175_c1_seq1	-1.760065686786	-0.0727688104785993	-0.148901259844554	6.48233064338231	117.870645303594	2.21817698407571e-25	2.33817199387746e-24
comp53943_c0_seq8	5.16623368314702	-1.41479736485575	0.776813261004333	4.08078757371035	117.686982066641	2.42965802625759e-25	2.55776726764208e-24
comp21667_c0_seq1	-1.38898647443491	-0.910004327490985	-0.480707943611649	6.1994794987405	117.316165934884	2.92006786803855e-25	3.07004800756427e-24
comp37130_c2_seq1	-1.675153362538	-0.451214384495904	-0.0737353521947136	5.60931648996554	117.043322213939	3.34305108292192e-25	3.51020363706801e-24
comp57597_c0_seq2	7.6068393664874	0.0188485255698957	0.0505936965341958	4.72079609643705	116.988492282396	3.4351770758998e-25	3.60226977713374e-24
comp56482_c0_seq1	-1.59282024211827	-0.277125846229414	-0.170579300180733	6.90243025756697	116.419942544721	4.55373688965426e-25	4.76906863404877e-24
comp57774_c0_seq2	-2.19338853255391	-0.0970693860898231	0.235688226598032	10.1121206717415	116.264835999983	4.91772508078358e-25	5.14362316191377e-24
comp59955_c0_seq1	6.53475167698154	-0.0718463790790118	-0.209511736997805	3.76241587907277	116.031127109509	5.52184087558092e-25	5.76804666719831e-24
comp50727_c2_seq1	-6.77275981298333	0.959896827927205	1.47872721744715	6.3303223634873	115.927887274674	5.81181909878582e-25	6.06314100576034e-24
comp59996_c0_seq1	-2.03475607588568	-0.0681149506480776	-1.04166475322008	4.62647270963541	115.811922359882	6.15573451539675e-25	6.41367403365116e-24
comp50612_c0_seq1	-1.44327415428322	-0.392026369542998	-0.0190809565301705	6.24525765734033	115.732236204357	6.4037823781159e-25	6.66355070051445e-24
comp56161_c0_seq1	-2.02860791392395	0.181750535988834	-0.134657618132098	5.17808526526634	115.540950552011	7.04077667566447e-25	7.31699176063285e-24
comp56950_c0_seq1	-2.51449520415514	-0.130378594552328	-0.890144662057801	6.2015413410847	115.350348225768	7.73850167151149e-25	8.03179187570706e-24
comp56669_c0_seq2	-5.71403085188481	0.0573079310656238	-0.689068083301083	7.71666343151749	115.167198936782	8.4739915738524e-25	8.78390993576056e-24
comp54501_c0_seq1	-1.75380857743239	-0.45103987835398	-0.0300512868333083	6.44548204417259	115.023543959331	9.09946525884933e-25	9.42021269326087e-24
comp54844_c0_seq1	-2.28778285167528	-0.483429538331915	0.175139383254046	6.10159168010046	114.547719963246	1.15200636950474e-24	1.19109229989865e-23
comp47167_c0_seq1	-1.69731716618088	-0.272794064386291	-0.408569740797491	5.11029429758599	114.482519013051	1.18984819304606e-24	1.228650885711e-23
comp35927_c0_seq1	-1.61681996237672	-0.432013323140303	-0.498057858891058	6.10991073853072	114.442704500229	1.21356466082713e-24	1.25154645555531e-23
comp59859_c0_seq1	-1.65781846734927	-0.215692369390443	-0.225931589200495	8.82145029134208	114.127627689155	1.41870641243089e-24	1.46124957803873e-23
comp60773_c4_seq1	-3.37928145291092	0.212925483770224	0.197596082374754	4.89570615412844	113.993812013113	1.51600220810511e-24	1.55948145925127e-23
comp50870_c0_seq2	7.00125976354715	-0.0314800807396272	-0.231372613400275	4.09720750121952	113.96987093038	1.53410026048875e-24	1.57609844252494e-23
comp61365_c0_seq3	6.67279723342859	-1.89238716179804	1.70222303001232	4.41678289949661	113.596522050106	1.8459720367939e-24	1.8941075101584e-23
comp51090_c0_seq1	-1.08147916776407	-0.372049805187075	-0.863892420411489	6.65556468247024	113.436489371579	1.99836539255164e-24	2.04788241112814e-23
comp57328_c0_seq1	1.90660979913049	0.914496512313743	0.172424780449305	6.0225058375194	113.366313489048	2.06909929234206e-24	2.11769177572282e-23
comp60438_c0_seq18	-1.94787479153297	-0.5949065040187	0.380071244481375	5.04083144237149	113.29035274488	2.14848810545501e-24	2.19617207853951e-23
comp58575_c6_seq4	7.1609546259633	0.19832393977803	-0.17900368002495	4.41030649059295	113.037471361274	2.43539022035968e-24	2.48630643907249e-23
comp35659_c0_seq1	-1.71134374848555	0.208942471607738	-0.236930505685043	7.22479702074114	112.872470052297	2.6429345422558e-24	2.69479589931139e-23
comp53958_c0_seq1	-2.59554945673235	-0.878127854299818	0.344580169721013	4.9563037880102	112.475783336633	3.21717402524592e-24	3.27618249354817e-23
comp57917_c1_seq1	6.84684724956174	0.356601038384935	-0.255276460249282	4.13886142173369	112.287233402335	3.53231679404498e-24	3.59259221236244e-23
comp35851_c0_seq2	-4.1438548463547	-0.571288808073034	0.612930747512295	3.82688869269226	112.258429265152	3.58310588061397e-24	3.63968123662367e-23
comp57056_c4_seq3	-4.88338662817543	0.854669276281475	0.415224277005769	4.55989981073215	112.174327298743	3.73561605984613e-24	3.78985028549596e-23
comp54329_c0_seq1	-2.05224581242906	-0.318851389743588	0.0865122363909768	4.86163713148379	112.030589356667	4.01144594248254e-24	4.06459760122044e-23
comp59008_c0_seq1	-2.85122689291031	0.144654231827967	-0.0422122895973662	8.51393324945311	111.773082297001	4.55750228791695e-24	4.61212403818412e-23
comp56435_c0_seq1	-2.61171305592926	0.17231707639458	0.221328664413493	8.14207109260314	111.690039295736	4.74898585851757e-24	4.79991014577849e-23
comp56601_c0_seq1	-1.34651898167581	-0.331869906224333	-0.133035098404268	11.7676250138358	111.643995790739	4.85859973930871e-24	4.90458399587003e-23
comp58016_c1_seq1	6.58613721433642	-0.468568050227478	0.068377346432145	3.72633709364192	111.495113668353	5.2306511447514e-24	5.2735893257904e-23
comp59750_c0_seq1	-3.22821309876666	-0.20630929975877	0.656968601571346	5.07669462055541	111.456757190695	5.33103273498843e-24	5.36811818010139e-23
comp54775_c0_seq1	-1.54604294625152	-0.336328381980971	-0.829820846929405	7.53271230328543	111.359360646743	5.59466674865588e-24	5.62659660851173e-23
comp56884_c0_seq1	-3.65974932025842	0.323312371325534	-0.0692109245675903	5.07856425484174	111.174133626833	6.13254297385949e-24	6.15990004288786e-23
comp57006_c0_seq1	-1.48556890458299	-0.378796729448659	-0.386869047935484	9.82876653411022	111.139569467282	6.23849417052531e-24	6.25856853295522e-23
comp54096_c0_seq1	-1.92473380643552	-0.263339028675543	-0.317580496470603	6.04078429499305	110.523490114492	8.46591414376382e-24	8.48265760807782e-23
comp54085_c0_seq1	2.31775727152308	-0.165129904937158	0.304410857936856	5.09174232419252	110.490307550111	8.60627674571495e-24	8.61265176552659e-23
comp57720_c0_seq1	-8.02790500899532	2.58908719721473	-1.36532142094328	4.84392341682815	110.27459921935	9.57720792964523e-24	9.57248427591914e-23
comp56481_c1_seq6	-3.90537937212369	0.25298497514376	-1.29555843324411	6.15133050620649	110.260300958428	9.64530764617896e-24	9.62867780540969e-23
comp50370_c0_seq1	-2.67321265547724	-0.274175775960232	0.234291804159025	4.67160532582187	110.007360620747	1.09333055550547e-23	1.09010301143018e-22
comp59859_c1_seq1	-1.72046130421518	-0.474118308584735	0.0884260644227309	8.6699343961065	109.93040888515	1.13582672444994e-23	1.13108248506034e-22
comp56126_c0_seq1	-3.07846464099428	-0.152361712440824	0.0352377423710977	5.17675407503053	109.814603809944	1.20291245026918e-23	1.19641819900392e-22
comp36128_c0_seq1	-6.76990288563899	1.52138674759281	-1.2302826833619	4.09123958553708	109.599412138461	1.33827055032952e-23	1.32941434815822e-22
comp48047_c0_seq1	-2.52037507890463	-0.258646962619232	0.285803179618263	5.27981819858402	109.402687896941	1.47529499338132e-23	1.4637382149754e-22
comp15496_c0_seq1	-1.30934374849132	-0.34352438524732	-0.165908831152167	8.03210439154154	109.37415511265	1.49630129466949e-23	1.48276507268837e-22
comp36708_c0_seq3	5.75076732226892	-1.25745587957178	1.87716946168985	4.27444377810135	109.162093978673	1.66208651128988e-23	1.64503947014844e-22
comp58909_c0_seq3	-2.79239308879005	-0.249971480186139	0.0159506779648067	3.89609520412612	109.120023641412	1.69709780873542e-23	1.67764327287918e-22
comp15294_c0_seq1	-3.20407595650641	0.50807627408215	0.0544896753528458	11.7161622536655	109.100747640166	1.7133848615918e-23	1.69168059537919e-22
comp59782_c3_seq2	-2.13007781441229	0.810193323039395	-1.29193522529911	5.3362997159831	108.963030589254	1.83438472142985e-23	1.80894434938083e-22
comp58603_c2_seq3	-2.33669148885071	-0.451572674893369	0.522756578755967	4.60104961596135	108.833459590286	1.95601715445651e-23	1.92654617910382e-22
comp60749_c0_seq2	3.95666173313116	-0.339502308111927	-0.489336138149492	4.89636178418479	108.727555688527	2.06139765672871e-23	2.02787492784501e-22
comp35925_c0_seq1	-1.63072925139543	-0.215384422856453	-0.226094783802128	5.58286745568244	108.669507097346	2.1215485889787e-23	2.08451792269834e-22
comp53436_c0_seq2	-1.65324745325175	-0.293491982606993	0.201597407071373	8.16102295705071	108.639143065142	2.15370815676536e-23	2.11355427587651e-22
comp54149_c0_seq1	-1.70362192333384	-0.406076686877608	-0.101004581775662	5.28557856215554	108.498526218106	2.30911312772421e-23	2.26332176702931e-22
comp50016_c0_seq1	-1.96796025521098	0.0377770305652998	-0.732618772604987	6.0223536566411	108.494624029048	2.3135819647234e-23	2.26496321329081e-22
comp58480_c0_seq1	1.77069294600137	0.311778993933997	0.234076118045039	7.11338465106171	108.402310818532	2.42185940509968e-23	2.36810522771266e-22
comp50649_c0_seq1	-2.87733864373407	0.29211359504315	-0.303541971930519	5.37829356137552	107.994455419644	2.96421559881062e-23	2.89493152336854e-22
comp55225_c0_seq1	-1.6863175194635	0.0360729220419203	-0.14716101832924	8.04180798514722	107.991651432557	2.96833648316412e-23	2.89546757310811e-22
comp50907_c0_seq1	-2.26650939274361	0.348000779950196	-0.25622591835571	6.84080158621388	107.807376734228	3.2520986446873e-23	3.16845091512443e-22
comp58573_c0_seq1	6.96513816447029	0.0974685012904337	-0.55694881455273	4.03791396594533	107.679702895243	3.46445612641425e-23	3.37129428099807e-22
comp55167_c3_seq1	-1.73174407508832	-0.204636833814798	-0.0405678605683246	5.61344294525063	107.006808484115	4.83521391426279e-23	4.69954963897053e-22
comp60725_c0_seq1	-3.41508254601184	-0.190291169199273	1.01630486745939	4.14267054498175	106.932480576554	5.01657896298701e-23	4.86998671544583e-22
comp59429_c0_seq6	-1.31875666348224	-0.466616887412709	-0.79561196124721	7.55034646261344	106.803339226061	5.34801619417131e-23	5.18552862080774e-22
comp56793_c0_seq2	-1.40335573614527	-0.0822484887984316	0.0239967693217665	6.28541080804561	106.401116960693	6.5272433197393e-23	6.32136611108803e-22
comp55764_c0_seq1	-1.8431303021638	-0.288469462444934	0.0729175597692342	5.76952152249649	106.214217868156	7.16043895070134e-23	6.92631481317244e-22
comp49945_c0_seq1	5.82372411256031	-1.72357410248671	1.61071347004121	3.80179244765276	106.134067608566	7.45046081242792e-23	7.19826404595241e-22
comp59467_c9_seq1	-1.38546852834875	-0.444477350427892	-0.172012965672719	5.48203680830383	106.070545487056	7.68863366350733e-23	7.41953148528458e-22
comp61520_c1_seq1	4.43384532789479	0.140399200401368	-0.117125075087558	5.20064215051844	106.029917889533	7.84494091638774e-23	7.56136635769786e-22
comp56058_c3_seq2	-2.28037991412074	-0.222424104058113	-0.0204189593467339	5.09646537502659	105.830647879193	8.65883825648918e-23	8.33593146165098e-22
comp48225_c0_seq1	-2.15954509596807	0.0943326019111976	-0.396534614351175	5.25162346167285	105.612189730392	9.64843253941345e-23	9.27760310373492e-22
comp35512_c0_seq1	-2.69372028734761	-0.456794552595477	0.120496826210928	5.4673529322161	105.440906046889	1.05027875912076e-22	1.0087155949565e-21
comp59015_c0_seq1	-5.26745602030919	0.721027835803297	1.05457788148164	4.26326394981279	105.235125774467	1.16298156915861e-22	1.11563652066268e-21
comp58441_c0_seq1	3.393846523021	-0.60738932847234	0.495652037856882	4.75870637127123	105.228892547783	1.16657787519075e-22	1.11776362367567e-21
comp58977_c0_seq1	2.14073512090698	-0.429901189464371	0.326100056110291	5.56066447580284	105.204181038201	1.18094511651011e-22	1.13019375613116e-21
comp58901_c1_seq1	-1.46883905796465	-0.224713735166684	-0.288049566223857	5.96322083076877	105.182976301648	1.19341447707656e-22	1.14078039518662e-21
comp61365_c0_seq1	4.54704343189659	2.05322297283695	2.06593494146703	4.31684501558024	105.166919682898	1.2029440115321e-22	1.1485352364522e-21
comp57936_c3_seq2	6.51991067725623	-0.608289841681019	0.298180674071256	3.74566917478629	105.08241715659	1.25436401015407e-22	1.19622054897752e-21
comp50896_c0_seq1	-2.80722163210157	0.149699876866811	-0.183114103679652	4.39850148922194	104.810157783032	1.43545987696786e-22	1.36731348562885e-21
comp49935_c0_seq1	-4.13731634600111	0.177336212769172	-0.35262237549667	4.02875821340311	104.801939860219	1.44131480095161e-22	1.37127908175044e-21
comp58872_c0_seq6	3.13297646859833	-0.66885643468163	-0.0578976969849969	5.41074591016921	104.388399980877	1.76894900831839e-22	1.68102000720151e-21
comp56897_c0_seq2	6.03601103720537	0.821300171185907	-0.295025393257904	3.76182413390952	104.379015580368	1.77719037439493e-22	1.68687414225355e-21
comp57975_c0_seq2	9.17658168669602	-2.57180550556741	-2.89212439234874	4.29337684923123	104.125627737235	2.01483036128352e-22	1.91020057410107e-21
comp58952_c0_seq2	-2.50875776674054	0.086211001330152	0.224910273443992	5.46690842718919	103.767932172551	2.40534754152489e-22	2.27777420228981e-21
comp46353_c0_seq1	4.04847817045378	-0.495425395756915	0.359696197438516	4.33835575800529	103.704131251849	2.48256701062995e-22	2.34815498111627e-21
comp57694_c0_seq2	-3.52694710491814	0.0161531069970154	0.27268285069285	4.00643781754901	103.614496450429	2.59525886652824e-22	2.45188442565011e-21
comp50888_c0_seq1	-1.79450212510126	-0.251100722767627	-0.0224559227517559	6.04440905098459	103.571774696792	2.65075582109856e-22	2.50140007983992e-21
comp54939_c0_seq1	-1.52889120796263	-0.544845554627928	0.0281360388440846	6.02739925717333	103.547235477608	2.68316795735794e-22	2.52904179794691e-21
comp43539_c0_seq1	-1.55110042686976	-0.079584602540405	-0.468925291221422	10.4360155284065	103.497707664953	2.74979773034364e-22	2.58883396076254e-21
comp60882_c0_seq1	-4.85146903133455	0.17535301660467	0.368398999960643	3.77673044684346	103.275877902604	3.06911607729404e-22	2.88610845969206e-21
comp44097_c0_seq1	-1.74040513516474	0.17392272603233	-0.223865017553361	7.9614763860373	103.254020089511	3.10251993300088e-22	2.91413981192412e-21
comp42542_c0_seq1	-1.8135622190188	0.12646256937439	0.174338887443099	6.29573501157664	103.080521034499	3.38089062433226e-22	3.17193280102284e-21
comp56711_c0_seq1	-1.22066468201937	-0.293402290113135	-0.206096207356984	6.75746702607779	103.045958407523	3.43925876444261e-22	3.22296318434356e-21
comp50470_c0_seq1	4.47263451178151	1.47204960330154	-0.674230382536208	4.50691438945379	102.972283138625	3.56706361693695e-22	3.3388704017195e-21
comp50710_c0_seq1	-2.08818584098654	-0.320749494952653	-0.176279481430069	4.44055812663835	102.953550456871	3.60030956276774e-22	3.36610257390949e-21
comp56352_c0_seq3	-1.67797912586388	-0.215361177932771	-0.274164285942327	5.20203636415925	102.810416415535	3.86477850926791e-22	3.60920444655826e-21
comp28371_c0_seq1	-1.54501695723249	-0.312795835969578	0.0203723859721204	6.14753008833984	102.721364663981	4.03903244885359e-22	3.76759459498357e-21
comp54110_c0_seq1	-3.86330985226045	0.130470853278255	0.402357237306528	4.10682149887599	102.529408968897	4.44182579491653e-22	4.13855630960844e-21
comp47794_c0_seq1	-8.85210353349748	1.34098047788841	0.4197602803966	5.27555466542895	102.379325451492	4.78453442218827e-22	4.45274810864043e-21
comp56061_c0_seq1	2.24674186180312	0.279131279577255	0.423044817085169	5.10619882340825	102.246200747622	5.11057976545771e-22	4.75072930949544e-21
comp54152_c0_seq1	-1.64097508948916	0.158032469378425	-0.518103207602649	7.04003622627969	102.001834654209	5.76798184616353e-22	5.35569998224531e-21
comp60287_c0_seq2	-2.02799639694659	-0.536872350972785	0.265565476029493	5.33894006465558	101.723087318204	6.62171084036074e-22	6.14137163294785e-21
comp48420_c0_seq1	-7.29140553085166	1.7333591283453	0.0378026715952186	4.01504048647547	101.647563849198	6.87403482541455e-22	6.36810586226404e-21
comp59897_c0_seq1	-1.47921534342616	-0.411534787119704	-0.81319703508165	5.85655706661598	101.497609133466	7.40388275966694e-22	6.85112712897948e-21
comp56437_c0_seq1	-1.84093899614547	-0.355800568992273	-0.280865871699467	7.33711939221057	101.432445899796	7.64667730906081e-22	7.06772705441812e-21
comp60197_c0_seq2	-3.20120499263472	0.514235890892744	-0.600680390366976	3.79193434448365	101.393304733081	7.79632537291325e-22	7.19783752537982e-21
comp60918_c0_seq1	5.9317728684151	-2.3578818954297	-1.27891514609287	3.80256560422195	101.175060417801	8.68604710992396e-22	8.01013627679677e-21
comp60766_c4_seq4	2.86916805933479	0.112105054758934	0.17878306264483	5.02867516076461	100.871811530935	1.0093285322668e-21	9.29729213926671e-21
comp61361_c0_seq7	-1.46803588396138	-0.97835286174827	-0.0839426238945388	5.39758118567483	100.812736194186	1.03928782243441e-21	9.56239170108208e-21
comp28604_c0_seq1	-1.33093945746412	-0.147064060812688	-0.189814110361972	7.02585266773898	100.658843253089	1.12157399394429e-21	1.03077990872023e-20
comp35467_c0_seq1	-1.77083854515641	-0.602231501788962	-0.11094747802135	4.89923998743493	100.571319149849	1.17124648702363e-21	1.07521223372747e-20
comp60559_c12_seq6	-1.67505524916063	-0.44019506992844	0.438579730028368	5.94859451852084	100.440164566316	1.24982805497682e-21	1.14605273909978e-20
comp35846_c0_seq1	-1.42152146432307	-0.231690337341764	-0.520441461530514	5.76221972002677	100.428127743059	1.25729882818763e-21	1.15160048602135e-20
comp55528_c0_seq2	8.02422483628012	-0.740034598146451	-4.33915856317193	4.41202872010962	100.227313896503	1.38873206070668e-21	1.2705487679558e-20
comp50609_c0_seq2	6.27743104190669	1.03582277187383	-0.0931754586046109	4.06757659153631	100.170984201311	1.42800783797065e-21	1.30500919217475e-20
comp60005_c0_seq1	6.61764058684857	0.235952065416381	-0.528057503391397	3.84665030259398	100.121603659775	1.46335078391783e-21	1.33580196558986e-20
comp51028_c0_seq1	-1.26935426180523	-0.463794305161225	-0.160257019077183	6.25603942972629	100.019197539284	1.53945765999166e-21	1.4036944647798e-20
comp56456_c1_seq2	5.68530691601256	1.74143452501942	-0.891955596846699	4.01735873241088	99.9668290170941	1.57989386797969e-21	1.43797730039996e-20
comp56401_c0_seq1	-4.26780229913342	-0.0429689618725784	-0.201585805376077	3.90057663785763	99.9659210825792	1.58060421250477e-21	1.43797730039996e-20
comp51106_c0_seq1	-1.27938129940509	-0.46648892575624	-0.423358069740083	6.05195910076459	99.9079378887922	1.62663639819666e-21	1.47819670894419e-20
comp61299_c5_seq1	-1.94390797757416	-0.0359941004681088	-1.05352851642542	4.38805002623495	99.8636337922814	1.66271018141577e-21	1.50928653197718e-20
comp60514_c1_seq5	6.52489720662561	-0.0644892430500674	-0.301120385243984	3.73558692445546	99.7190952696684	1.78605283340159e-21	1.61943448182923e-20
comp54114_c0_seq2	-2.55174501376189	-0.0887734799885259	-0.405321919354284	4.36610678948541	99.6985995279796	1.80426834208177e-21	1.63412281351004e-20
comp35491_c0_seq1	-7.34925666756186	1.52294900067738	-0.429947224598257	5.0926032634216	99.4713875323762	2.01908131025655e-21	1.82663762287272e-20
comp58681_c0_seq1	3.47737933373247	-0.106856396357883	0.33263305652674	4.62405390884389	99.4441137759242	2.04652872796418e-21	1.84940489062181e-20
comp35850_c0_seq2	4.4436554966423	0.69821966436216	-1.18321365855373	4.21170750928269	99.0709893951363	2.4617302125595e-21	2.22213642572464e-20
comp36703_c0_seq1	-1.19454509160186	-0.353722929356671	-0.33932524748227	5.86412050268714	99.0628557931264	2.47166248679544e-21	2.22862025783802e-20
comp59464_c1_seq3	4.96851763889756	-0.169146536972378	-0.171957102222779	4.31138251841437	98.9609518873592	2.59955021849125e-21	2.34132823012112e-20
comp58728_c3_seq1	-1.69578409445267	-0.0600123160130938	-0.390033848076964	8.41778604126137	98.8853653276874	2.69866490126444e-21	2.4278998545671e-20
comp46019_c0_seq1	-3.28578752073577	0.0302291311581715	-0.114669174082672	4.42875340923085	98.8751367076208	2.71236452577825e-21	2.4375196059821e-20
comp58152_c0_seq1	3.23803560978131	0.225718148090789	0.883670262005941	4.59545350315618	98.8589651252347	2.73416581642876e-21	2.45439070963139e-20
comp57670_c4_seq4	-1.64071070448298	-0.535470123648759	-0.201481521998742	5.10889889091008	98.7192704399367	2.92993603370104e-21	2.62437965922296e-20
comp35881_c0_seq1	-1.80894260838433	-0.352587179075442	-0.0459436370027923	5.72950487235922	98.7192215826883	2.9300068980962e-21	2.62437965922296e-20
comp57896_c0_seq1	7.41848962525606	-1.20534621257117	0.922589285578266	4.47686616750529	98.5849457272415	3.13138546512205e-21	2.80165679694032e-20
comp35936_c0_seq1	3.19249985594611	0.650853925333411	-1.28996134811186	5.90130261829565	98.5419475767843	3.19875219650226e-21	2.85877456503278e-20
comp35851_c0_seq1	2.72302729892799	-0.487866683295302	0.528753941460899	5.304771252562	98.492445897139	3.2781044793729e-21	2.92646639975735e-20
comp43294_c0_seq1	-1.51002075658678	-0.384489613480679	0.0913073184342755	6.22838901467181	98.466152606892	3.32105044937908e-21	2.96154399809316e-20
comp57684_c4_seq3	3.67072254586481	1.0364173032799	0.714137265039342	3.8413855934396	98.4532910338943	3.34226223601009e-21	2.97718436099975e-20
comp54470_c0_seq1	-2.24621590978656	-0.517700422546507	0.431950521582235	5.27061519246594	98.4160455393584	3.40445607529395e-21	3.02925586677637e-20
comp59970_c1_seq2	-2.41231196020666	-1.03040706174337	-0.340915456127083	3.66719538629547	98.1552631252497	3.87356759224769e-21	3.44288803758331e-20
comp44823_c0_seq1	-1.81340678685067	0.0100984920391054	-0.171412662015501	8.32366992177666	98.09472091327	3.99141041149289e-21	3.54374291298591e-20
comp36141_c0_seq1	-1.5779210899671	-0.00716221105009641	-0.0498248961546087	7.80100037542972	98.0274333316343	4.12659308640648e-21	3.65975531273642e-20
comp52040_c4_seq2	-1.40097682202804	-0.227494124005558	-0.27892649031138	5.63633322367161	97.9826956500886	4.21899635081144e-21	3.73761578357131e-20
comp56495_c5_seq1	6.22826395618431	0.208013668111184	-0.328678690928856	3.6178011608338	97.9374462081534	4.31456111348411e-21	3.81810397226006e-20
comp59985_c0_seq1	-3.64632086138591	-0.513964764611577	1.22077464149365	3.63133292438148	97.8948555051382	4.40648705264165e-21	3.89520000531224e-20
comp58255_c1_seq1	-2.03384511583474	-0.285819006012016	0.114306101233962	5.62581920784128	97.7521633027634	4.72897758857241e-21	4.17571811905969e-20
comp62492_c0_seq1	-2.51805916649231	0.0070381244526138	0.241361602712321	7.91026965540334	97.6238231598728	5.03913913427107e-21	4.44475101440711e-20
comp57904_c0_seq2	6.71160146325294	-0.219105934212781	-0.589589693958743	3.70974391328506	97.4181070166745	5.57927922822929e-21	4.9158301547855e-20
comp59879_c0_seq1	-1.25959172479766	-0.310255058297389	0.13584285697143	11.6615271730913	96.913520503744	7.16213549503338e-21	6.30361241289257e-20
comp60866_c0_seq1	-1.87981716435798	-0.436422428849004	-0.0114146704859957	5.42687404790424	96.6761153301582	8.0551289947763e-21	7.08187371276103e-20
comp57856_c0_seq2	3.42709367422262	0.366804286824243	0.806462482297836	4.15887698052323	96.6701417654163	8.07897927836364e-21	7.09514691553799e-20
comp54762_c1_seq2	-2.14398286161253	-0.298190836380223	0.139319515462393	5.04758660691579	96.599348984595	8.36706355352509e-21	7.3401966628652e-20
comp56644_c1_seq1	-2.95917188093792	-0.190129724448496	-0.167643511395219	4.11774273094242	96.575405070491	8.46680726059869e-21	7.41966915182843e-20
comp56555_c0_seq1	-1.39074542061729	-0.386946922954198	0.117780170037251	5.91853862711855	96.5134266998158	8.73054803530386e-21	7.64252941405757e-20
comp35901_c0_seq1	-1.56907668525624	0.317071303082147	-0.440927711788002	6.38814773864611	96.3208885766902	9.60341568200961e-21	8.39754989410679e-20
comp56971_c0_seq1	2.44233358338835	-0.146440584176196	-0.0428498173856271	5.76843939376484	96.2162637004276	1.01137797419965e-20	8.83429941687756e-20
comp77583_c0_seq1	-1.55992360631362	-0.435348594571571	0.157131928570782	5.4759868144203	96.0735486690008	1.08539506718677e-20	9.47062692638959e-20
comp57591_c3_seq3	3.93771108798832	2.4487893663996	2.25400200632755	3.96433063948166	96.0066670385561	1.12192245439294e-20	9.77882087667657e-20
comp57200_c0_seq1	-1.58484263397598	-0.371870623431834	-0.381616337878766	5.3363136720429	95.8974833712734	1.18421259817327e-20	1.03106630728169e-19
comp54803_c0_seq2	3.10130225696892	-0.0291283608742684	0.959192729334057	4.18128643534925	95.8757341520591	1.19702770628232e-20	1.0411058569876e-19
comp60217_c8_seq1	-1.53952871430792	0.0990853549508577	-0.00119946982607603	6.05664593814301	95.8364909991311	1.22050242036811e-20	1.06038506104007e-19
comp54671_c0_seq1	-1.20844653574452	-0.244472834250281	-0.200005423697945	7.14622163812763	95.6382690768208	1.34629893062e-20	1.16842603122117e-19
comp55427_c0_seq1	-1.62237495918455	-0.65549543784444	0.329869047536179	5.75154519462134	95.6115631085248	1.36420995361065e-20	1.18270437261689e-19
comp54665_c3_seq1	-1.67664877854366	-0.0724780394509048	-0.321893436403095	6.52171400345902	95.4492957555099	1.47827681945946e-20	1.28022563018573e-19
comp52425_c2_seq1	-1.31726616513894	-0.192695025746849	0.0489783934411096	6.79920607931421	95.3571281335715	1.54726319273037e-20	1.33853953471424e-19
comp57314_c0_seq1	-1.83452792416907	-0.433132331199395	-0.293035530379011	5.01560493216929	95.3494705976296	1.55313756356465e-20	1.34218902881184e-19
comp56232_c0_seq1	-2.10642050093311	-0.366360532467293	0.0146685562827227	4.82780033460431	95.2621844122619	1.62169452463276e-20	1.39994204650406e-19
comp52491_c1_seq2	-2.21615289226864	0.290725256288555	-0.402890496600654	7.3149584516849	95.1941529488228	1.67721958010976e-20	1.44633424642231e-19
comp57366_c0_seq2	-2.32355415371828	-0.385442097690139	0.180688817735558	5.37582299921476	95.0191995901111	1.8288970373343e-20	1.57545583258574e-19
comp35733_c0_seq1	-1.12395357827494	-0.311997231936848	-0.0148615465839475	11.2796399376477	94.9768454974328	1.86763280643136e-20	1.60711587355972e-19
comp59636_c0_seq2	-4.37902367541512	0.308332399819814	-2.54466687985164	3.8752942083649	94.9155461411792	1.92515255007953e-20	1.65485541579477e-19
comp51164_c0_seq3	6.6686285261746	0.521928865515185	-0.633318182181815	3.97033327636294	94.881417446104	1.95794101216347e-20	1.68125739879206e-19
comp59585_c2_seq1	-1.95000865018474	0.129543953370197	-0.238490332296095	10.3627065659233	94.8062278246486	2.03216138228839e-20	1.74314287458515e-19
comp59722_c0_seq1	-4.84478559821766	0.42322491841318	0.64148998341211	4.28521592313618	94.766034322694	2.07298379050807e-20	1.77627976806114e-19
comp60765_c3_seq1	5.60140206648014	-0.754523994402502	1.17369697406778	3.90739842371024	94.7622120502707	2.07690830421984e-20	1.77776332777254e-19
comp35710_c0_seq1	-1.13673447556614	-0.201183007075637	-0.0636731521484079	9.17483381725187	94.6877171569717	2.15489646051277e-20	1.84257285959035e-19
comp60895_c0_seq1	-2.80504570538101	-0.401410622233564	0.080782352328145	3.88884347783659	94.5522387457873	2.30430853543334e-20	1.96825342341651e-19
comp55910_c1_seq5	-1.54297373235396	-0.527900706819792	0.159678457044444	5.36466636102168	94.5481592685989	2.30896472899825e-20	1.97015453613261e-19
comp59332_c0_seq2	-2.79246522781577	-0.132967824561881	0.470411387580052	4.10339674177481	94.3143075731267	2.59221395074594e-20	2.20951485644023e-19
comp44572_c0_seq1	-1.52905244909878	-0.160531318513321	-0.117231629220934	7.68894105380798	94.1457585920378	2.81767158173204e-20	2.39916447915125e-19
comp52495_c1_seq1	-2.02153207885508	-0.686586584846386	0.552588737718324	5.09174011715608	94.0446106537986	2.96227759929554e-20	2.51964556347216e-19
comp57129_c0_seq1	-1.45274504336917	-0.363579695972086	0.0450308283734623	5.81884615018513	94.0067373221784	3.01831235322742e-20	2.56461634541525e-19
comp59556_c0_seq1	-2.16029865638062	-0.784402024713735	0.270263393848449	4.43714524416029	93.992512167238	3.03963160032424e-20	2.58002657091396e-19
comp57504_c0_seq1	5.50680023942933	-1.56396634778616	0.674883910957011	4.44832124305625	93.8539748152111	3.25529441407251e-20	2.76019001260165e-19
comp62017_c0_seq1	-8.15625526383612	1.9786147221396	0.697387690181227	8.88050591954574	93.6867002061567	3.53617816523589e-20	2.99522050234087e-19
comp61443_c1_seq1	-1.30732302227696	-0.182943826323709	-0.0766471210395243	7.43706407418889	93.5126140734006	3.85425952433031e-20	3.26123462465778e-19
comp58841_c0_seq3	-2.16431823500738	-0.922293858764036	-1.77841435041263	3.9114049385465	93.4674822002797	3.94129155627661e-20	3.33139826435644e-19
comp58397_c0_seq2	2.2307586300261	0.556111170600496	0.311901538110487	5.61894129153137	93.446110137149	3.98318813348827e-20	3.36330448021416e-19
comp61228_c1_seq1	-2.70038772902596	-0.529648669614453	0.561158799323256	4.24210262620343	93.3972444758439	4.08066213030563e-20	3.44202364497996e-19
comp35508_c0_seq1	-1.87372493415409	-0.157870265564321	0.0817482653976914	5.16542556942794	93.3804992729825	4.11461006997698e-20	3.46705085522176e-19
comp56412_c1_seq1	-2.32716128245227	-0.424278379701972	0.416899445431807	4.25706667197522	93.3528889588169	4.17120281442317e-20	3.51108722883844e-19
comp37144_c0_seq1	1.8022133310239	-0.265716706351678	-0.112017130798116	6.36793411725162	93.2924994627102	4.29771014225027e-20	3.6138214121453e-19
comp55425_c0_seq1	-1.56592866645493	-0.179725290587484	-0.217358385214032	6.20995002781046	93.279552972508	4.32532659785925e-20	3.63327434220177e-19
comp35766_c0_seq1	-1.3502213714923	-0.117798991515743	-0.257201864522777	7.41592276440041	93.1828506931423	4.53729472413932e-20	3.80738209460386e-19
comp57844_c2_seq3	-1.48052693743919	-0.503012904853979	-0.239701406771854	5.01123175709679	93.1565280881502	4.59677025561889e-20	3.85330089886729e-19
comp63377_c0_seq1	-1.38427511206673	-0.0464298837725214	-0.202235526276242	6.30215618888225	93.1087217645917	4.70678829588337e-20	3.941448959342e-19
comp60514_c1_seq4	4.9070190482034	1.23284243532546	0.80860373068133	3.92859768119932	93.1020570921787	4.72233355796436e-20	3.95038553362839e-19
comp45310_c0_seq2	-1.49161084620008	-0.00332693185228134	0.125242274493673	6.68148877480071	93.0749739223063	4.78603460221642e-20	3.99954602943982e-19
comp57833_c3_seq2	-1.66846600476314	-0.253580301598257	0.780353998833922	6.95524075424617	92.6942134840199	5.77810378150955e-20	4.8236157829986e-19
comp54290_c0_seq1	-0.94765931775789	-0.32447264725599	-0.499959524042498	9.24204194770753	92.609878367888	6.02427731292696e-20	5.02394978380514e-19
comp58210_c0_seq1	-3.13408359456505	-0.176671391907007	-0.482771671877576	4.04449115960761	92.4806881619691	6.42186940518339e-20	5.3500178210089e-19
comp59596_c0_seq1	-4.22586110488454	0.47316824677981	-0.0773223723019628	4.15434465873708	92.4475013514657	6.52817202138338e-20	5.4329940867899e-19
comp61490_c1_seq15	-3.53954172567857	0.546320135900622	-1.13895091075333	4.50405488168137	92.3610366991905	6.81346803067731e-20	5.66461249812002e-19
comp51186_c0_seq1	-1.08695838468702	-0.429939149763801	-0.117192097752671	7.70168772526331	92.310910204596	6.98453734340436e-20	5.80088726492169e-19
comp55787_c0_seq1	4.36312976221035	-0.411676951627764	-0.545103484342189	4.5087866513823	92.2386679463431	7.23866395616816e-20	6.00579427110533e-19
comp59033_c0_seq1	-1.59835697012629	-0.546830299266108	-0.360717109959748	4.90944166501582	92.1626623327949	7.51601402417597e-20	6.22953064212376e-19
comp54973_c0_seq1	-1.66771076310416	-0.445966010648762	-0.196932825575041	4.76977764978393	92.1543398817817	7.54702140445182e-20	6.24884121598431e-19
comp60471_c3_seq10	6.56142646699442	0.659853381476231	0.157593439761816	4.29676690643768	91.9789476252867	8.23107492190091e-20	6.80827482825804e-19
comp54882_c0_seq2	-1.59859737462908	-0.390885684085236	0.155994889659988	5.10751153734619	91.9756814490243	8.24438467539055e-20	6.81233253605665e-19
comp61201_c0_seq2	3.83279972687387	0.144017607291203	0.340822586921937	3.96914369090153	91.9194745405815	8.47683010784648e-20	6.99726933342195e-19
comp52976_c2_seq1	-2.48099413264079	-0.136336612696668	0.40178340772425	6.61382238961114	91.6606064065035	9.63488429453872e-20	7.94510397675798e-19
comp35677_c0_seq1	-1.55612788208263	-0.325936869078243	-0.231366276252685	6.26388387902788	91.5418566157538	1.02177939863938e-19	8.41721931440122e-19
comp35798_c0_seq1	-1.17703425208183	-0.393997205888102	-0.115813559101982	8.25052138170535	91.3973263999044	1.09750279385007e-19	9.03183517456719e-19
comp59210_c0_seq1	-3.3491765140105	-0.0558376208588988	0.587486517492194	4.51298283860022	91.3584889646608	1.11879042560985e-19	9.19768274847209e-19
comp58362_c0_seq2	1.32801985912315	2.37023190525224	-0.229971808983184	5.62199433421064	91.3275911885896	1.13602061729525e-19	9.32231413855963e-19
comp59544_c4_seq7	-1.83057460330616	-0.818851118088594	-0.0617041242283156	4.38473970867769	91.3271821701876	1.13625047728805e-19	9.32231413855963e-19
comp54440_c0_seq1	-1.1391415982456	-0.402751565205861	-0.602708232704514	6.99508806175733	91.2149096412423	1.20113633562127e-19	9.84470286809505e-19
comp50669_c1_seq1	-1.64247922595464	0.266631080796008	-0.13323965710698	6.82771263683635	91.0558207799383	1.29947225082377e-19	1.06399212779571e-18
comp46572_c0_seq1	-2.93802921584285	-0.0370116552497812	0.247538232942387	6.07527158255956	90.9910385417175	1.34178532364481e-19	1.09752894384105e-18
comp49099_c0_seq1	-1.29922704565391	-0.416357091813653	-0.479628414640129	6.39005054452827	90.8878916978037	1.41201737099237e-19	1.15381177512744e-18
comp50380_c0_seq1	-2.08358033343534	-0.483758728396152	-0.359768043386606	4.65353372288939	90.8308548982009	1.45241931367062e-19	1.18563050922598e-18
comp61171_c5_seq3	-1.25014744668099	-0.451385674438963	-0.0572530210999898	7.23002545054644	90.6902356827607	1.55703306036506e-19	1.26974949570615e-18
comp57933_c0_seq2	-1.36797565525753	-0.305298957922117	-0.102170879450135	5.43251676594964	90.445662954503	1.75724483168553e-19	1.4315805633812e-18
comp57217_c0_seq1	5.70622424648846	0.509898290039939	-2.40156510151173	4.78206525939787	90.303112125717	1.88560889870806e-19	1.53461302539433e-18
comp60052_c0_seq2	-1.22687914216688	-0.347485170274316	-0.550559381623466	5.07371134080719	90.2654068269942	1.92110224231576e-19	1.56193127143546e-18
comp57625_c0_seq1	-1.57604584459805	-0.115425350159685	-0.713183227902113	5.33352320601866	90.1635282308598	2.02038053546331e-19	1.64100246698052e-18
comp57215_c1_seq2	7.76347941419253	-0.212221405059372	0.666370398079123	4.94125950282609	90.1229312469216	2.0613560158755e-19	1.67260779426294e-18
comp35855_c0_seq1	-1.64493225731195	-0.383379074475587	-0.537472740996908	5.69853138244687	90.1030263510229	2.08174899533094e-19	1.68746573561526e-18
comp57740_c3_seq1	-4.12294165502703	0.721591037229987	0.718545298466714	3.77102886119746	90.0372075374905	2.15062885475809e-19	1.74155819147544e-18
comp58404_c0_seq2	-3.43142909805892	-0.035658860619447	-0.267370968612007	4.86147464080313	89.9693547886002	2.22402324471462e-19	1.79919485246075e-18
comp60697_c0_seq2	-1.52989644456708	-0.245291795591344	0.403418896425721	6.82524415131328	89.9313340059122	2.26623853878463e-19	1.83151840432584e-18
comp57183_c0_seq1	-3.74286511324638	1.03981955433642	-1.29431795303444	5.50224301470762	89.8391850887501	2.37190714564833e-19	1.9150079006599e-18
comp35540_c0_seq1	-2.45159020508451	-0.126589136011019	0.364798926172598	5.00476185711734	89.8026481027352	2.41515586096933e-19	1.94621956668495e-18
comp60872_c3_seq6	-2.06238109397603	-1.30669882700605	-2.0958812591092	4.01099147461439	89.8024709326183	2.41536748591792e-19	1.94621956668495e-18
comp60981_c0_seq9	6.56978817301017	0.0604714587665406	-0.215251797237132	3.83796128436055	89.6534461037228	2.60010375777467e-19	2.09299315397432e-18
comp58548_c1_seq2	4.30231282911243	2.21147641054073	-0.542312807904267	3.81722037632143	89.6465065849408	2.60904236202021e-19	2.09810489945792e-18
comp54717_c0_seq1	-3.01533694512602	0.317494603589778	0.66756927947567	6.78008493210196	89.4981199483676	2.80770144638228e-19	2.25562219270315e-18
comp16054_c0_seq1	-1.47499898617321	-0.547722071361195	0.362672673860073	6.12452741734643	89.462950200018	2.85696182805887e-19	2.29292401764804e-18
comp55811_c0_seq4	6.21612724760092	0.662020100031383	-1.18374701685446	3.59280224123111	89.3081301353795	3.08429012894639e-19	2.47292342089411e-18
comp61478_c0_seq5	-2.93203210916895	-0.296963900897659	0.12661241944707	4.22939651569846	89.2708641920476	3.14165692031219e-19	2.5164299403212e-18
comp59636_c0_seq3	8.62247101172226	-2.5016286327901	-2.13665930967022	4.04029693775023	89.1188089968897	3.38699826715336e-19	2.71026732019201e-18
comp57568_c2_seq11	-2.88345278214901	0.0919752912751548	-0.0390414053490862	4.96886936336844	88.9367175974058	3.70613416943041e-19	2.96271435674585e-18
comp59130_c3_seq1	-0.859841682764701	-0.657399908494602	-0.392679367349605	6.19259537893044	88.9051825943216	3.76438074692175e-19	3.0063123482313e-18
comp56524_c0_seq1	-1.93797260755718	-0.62397646835916	-0.285695308739932	4.18232639470451	88.8920829791978	3.78884455536142e-19	3.0228714533228e-18
comp56958_c3_seq2	-2.42339490267965	0.149321531825826	0.171433385819538	5.54129891736128	88.8149815224252	3.93608831741012e-19	3.13725977393574e-18
comp57060_c0_seq2	7.09504083300093	-0.980162843767749	-2.20254709110105	3.64087823766017	88.7870074259295	3.99091444410449e-19	3.1778342322113e-18
comp58328_c0_seq1	-1.69015144619249	-0.7994815343814	0.141573533562935	5.23316076484484	88.6633438032804	4.24257548522869e-19	3.37490842819075e-18
comp50334_c0_seq1	-2.3016050473565	-0.848930575911063	-0.377435975798092	4.58562633763214	88.6216936584659	4.3308584524951e-19	3.44175868783581e-18
comp56527_c1_seq1	3.29210773101843	0.325247167136976	-0.377434071714248	3.9734284819586	88.5453386186414	4.49750022773264e-19	3.5706892111656e-18
comp58154_c0_seq1	-4.98095739345441	-0.0344577576253582	0.92367070377287	3.82490750152948	88.4762327148744	4.65384073835986e-19	3.69119696919227e-18
comp58591_c0_seq1	-1.8570822299408	-0.0652061404437184	-0.187251664603373	4.87838948302191	88.3756178524444	4.8912299949993e-19	3.87569016026044e-18
comp35760_c0_seq1	-0.975492546174294	-0.488727834017551	-0.664692735140171	11.3223627381531	88.3050050116985	5.06502622967048e-19	4.00948267751064e-18
comp35682_c0_seq1	-1.25083702611219	-0.740737562433766	-0.731417043562592	6.84069392502199	88.3027628067558	5.07064486104947e-19	4.01001436523581e-18
comp56495_c5_seq3	6.23819624262691	0.935348255149391	-0.0482931926916075	3.98423079674737	88.1706530809626	5.41293073601183e-19	4.27653182710642e-18
comp60280_c0_seq1	-1.2817613377211	-0.31657310890497	-0.595459698516052	8.36074519041068	88.0959000838758	5.61674542950969e-19	4.43323646072109e-18
comp64176_c0_seq1	-1.8941933364308	-0.0347502250673966	-0.616731891222936	6.99580916804194	88.059714163814	5.71814495306615e-19	4.50887966824457e-18
comp54336_c0_seq1	-1.38785596346363	-0.230389305448061	0.0541209983506624	5.59979013662488	88.0081859998219	5.86570276120678e-19	4.62073727719554e-18
comp51063_c0_seq1	-1.76669473232145	-0.461174259444057	0.00428708344195795	4.97054841265923	87.9012034251158	6.18433075621716e-19	4.86700826309673e-18
comp60656_c0_seq1	6.81687823777811	-0.0114540771649787	-0.816000482968712	3.78309037849502	87.5598173247653	7.32145515628087e-19	5.7563254604086e-18
comp58499_c0_seq4	-2.65129792776432	0.0616989436101818	-0.0413910287698806	4.43812713443868	87.4108741392057	7.88094854306991e-19	6.19021016377177e-18
comp55958_c1_seq1	-1.29732141122861	-0.283488327949683	-0.156210251136289	5.42533504547346	87.3192153140067	8.246300903308e-19	6.47091143487073e-18
comp47708_c0_seq1	-1.65147168304142	-0.377083540592473	-0.572081760394318	4.92182832246577	87.3122040582469	8.27493522085831e-19	6.48710105418544e-18
comp57230_c0_seq1	-2.19508777868608	-0.206073688945237	-0.160473878906005	3.97050058633015	87.2781428803248	8.41546355729485e-19	6.59089348748135e-18
comp50331_c0_seq1	1.98140143314377	-0.144484956847603	0.994068769788345	6.13374507829025	87.1965312318185	8.76195762441006e-19	6.85563981693706e-18
comp61528_c1_seq3	6.50745456629564	-0.51558718595885	-0.0192411823928064	3.65013820863438	87.192857268375	8.77788714493059e-19	6.86148053971141e-18
comp45275_c0_seq2	-7.0399418281711	1.68944360368682	-0.140593560477872	10.2948447458996	87.1767579961279	8.84803226007707e-19	6.90964831408331e-18
comp59253_c0_seq1	7.12327635080589	-0.244069352203002	-2.53043605031254	4.12667320125687	87.0977220260606	9.20060855368858e-19	7.17806861753606e-18
comp54668_c1_seq1	-1.99604291379253	-0.149412627499593	-0.140959385247093	4.98853491810678	87.0899329807464	9.23610655544285e-19	7.19883459023267e-18
comp78728_c0_seq1	-1.88976379168161	-0.0564522267228033	-0.87289341801187	4.93998681150074	87.0670621136018	9.34113211005007e-19	7.27369998886319e-18
comp48907_c2_seq1	-1.42975474618601	-0.343834708369737	-0.172239053698151	5.41217362749298	87.0042492531611	9.63575886329207e-19	7.49591759557059e-18
comp59906_c0_seq9	-2.19430562125686	-0.271292256427035	0.425268386871884	7.88713817454341	86.8527351977614	1.0385244406361e-18	8.0712167936685e-18
comp54979_c0_seq1	-1.14754862734397	-0.120858960888146	-0.125649617297354	7.48044712556727	86.7485054237421	1.09344008324886e-18	8.48987099120236e-18
comp61434_c0_seq2	-1.57056616394974	-0.372518895820363	0.187655477173115	5.75135934248423	86.7370857874834	1.09963051417682e-18	8.52976550039934e-18
comp57549_c0_seq1	-2.42758634191307	-1.01020805784612	0.319986157139035	4.53026374819091	86.7227578585209	1.1074470736797e-18	8.58218544861151e-18
comp19019_c0_seq1	-2.04634120520974	-0.204290085437154	-0.304272815859959	4.57952295146111	86.64608048795	1.15023205262498e-18	8.90523497476416e-18
comp58076_c0_seq1	-1.12379298939262	-0.469797980704336	0.110886825891557	6.2205360144389	86.6350315940656	1.15653193331142e-18	8.9454655070824e-18
comp46009_c2_seq1	-2.84719428951695	-0.211042799449069	0.184691892600533	4.4223043555911	86.5711922421469	1.19361336401034e-18	9.22347943628959e-18
comp55927_c0_seq1	-1.4577306887641	-0.575153393580338	0.299806454598615	6.10029550131292	86.5389382462624	1.21279787903038e-18	9.36279962611454e-18
comp57334_c2_seq2	-1.28454033177166	-0.172116510737073	-0.40268390044076	5.83557530808682	86.2832460356694	1.37620497315794e-18	1.06141936369346e-17
comp61091_c2_seq6	6.27622731706314	0.204119676277068	0.327451985590558	3.79723558409084	86.273674211888	1.3827321711791e-18	1.06543982695606e-17
comp57185_c0_seq1	-2.6167697900986	0.0107846331588462	0.16311864749055	4.78091885474933	86.1712599617611	1.45453741870945e-18	1.11970373371878e-17
comp63335_c0_seq1	-3.01520605822493	0.473053245632361	-0.604663172261376	7.2887884320353	85.7539457879614	1.7877758439891e-18	1.37492514149674e-17
comp56042_c0_seq1	-2.23417769938403	0.284139382029771	-0.210247931829316	4.91166739212722	85.743045584996	1.79743433269425e-18	1.38091592228796e-17
comp56664_c2_seq2	-1.37637296023732	-0.308195742582439	0.117840639961556	6.06431362166204	85.7413149286658	1.79897263007166e-18	1.38091592228796e-17
comp51120_c0_seq2	-6.17175236449314	1.09139360504663	1.82081132315695	3.78217126314898	85.6932964828438	1.84218281963256e-18	1.41241907643847e-17
comp46732_c0_seq1	-2.15182369022978	-0.394706110737541	-0.0970634146989931	4.22132859822185	85.6918528035752	1.84349788165791e-18	1.41241907643847e-17
comp60981_c0_seq7	3.52432845871158	1.07813486764855	0.560110677986048	3.71368838068024	85.4615965154262	2.06571828439632e-18	1.58118153100251e-17
comp59718_c1_seq1	-1.30426553335877	-0.501246484596919	0.368161483503591	5.95387979389972	85.4395784986386	2.08832245713741e-18	1.59697564505244e-17
comp28070_c0_seq1	-1.48258269006544	0.169883919150899	-0.799117244713681	6.36542598497319	85.2806664936884	2.25896634780386e-18	1.72584177335515e-17
comp55379_c0_seq1	-2.41972888832076	0.237298429136228	-0.290830329275033	5.09144519198216	85.2642705105664	2.27734746352135e-18	1.73824656678946e-17
comp47959_c0_seq1	-2.48738334900413	-2.12954632879323	-2.0291254550674	3.71472377382503	85.2045794260364	2.34553775950481e-18	1.78861044953396e-17
comp48962_c0_seq1	3.52762874458761	2.11851497196786	1.82507573345434	3.47785260345241	84.92414460015	2.69425356177622e-18	2.05259580561636e-17
comp54783_c0_seq1	-4.37864644940483	0.431755083617721	0.196315663373557	4.128326855664	84.8677490146457	2.77040745025532e-18	2.10863124805348e-17
comp60361_c0_seq4	4.41425610550315	0.874918439784456	-0.457328210588983	4.64397544367223	84.4988111089453	3.3245513230945e-18	2.52803124061952e-17
comp59237_c0_seq2	7.1942536372948	-0.633302727990263	-0.249609841982702	3.9656307838869	84.4178815475078	3.46021718636402e-18	2.62872732077477e-17
comp58644_c0_seq1	-7.36861921399679	1.52105643021059	-1.39116977818758	4.90737480551014	84.2678748220238	3.72648647479796e-18	2.8283613637371e-17
comp35091_c1_seq1	-1.57891544848897	-0.6814520845464	0.312007782177154	5.07759832262689	84.2375388357821	3.78277519169157e-18	2.86839810138932e-17
comp57321_c0_seq2	5.47930397985809	-0.7597103918731	-0.609256308498492	3.97989102797424	83.920353815468	4.42472237765662e-18	3.35203734516678e-17
comp71925_c0_seq1	-3.02576412785322	0.375824511490922	-0.110699264924293	5.48973601392604	83.8612564632033	4.55584988759612e-18	3.4481530521806e-17
comp58050_c0_seq1	5.98625422604801	-0.0792051646392067	-0.000374393661239218	3.46587558897402	83.8092762333395	4.67439312501856e-18	3.53457375666049e-17
comp62480_c0_seq1	-1.57760783248057	0.0213654404592747	0.0244434416321926	7.64665240675498	83.7933258257811	4.71138335636014e-18	3.55922399689239e-17
comp50137_c0_seq1	-2.29475216712464	-0.484726414453715	-0.17915566028205	4.0604323539194	83.7419791004135	4.83245934313488e-18	3.64729193998616e-17
comp14919_c0_seq1	-1.28592032304055	-0.41896548397204	0.154409663898789	7.44209651124064	83.7030506704793	4.92632174526502e-18	3.71467572717379e-17
comp58988_c0_seq1	4.2201179438435	2.37535937089249	0.157580193389095	3.92548786546852	83.6959362047236	4.94367176321251e-18	3.72429398815991e-17
comp51314_c0_seq2	-3.73065427620168	0.190146878847471	-0.494401104775463	3.2654409333996	83.6875684232352	4.9641564312709e-18	3.73625367055542e-17
comp56034_c0_seq2	6.66202026458874	-0.278947090885991	0.368578559637268	3.98502642415487	83.6283018342175	5.11169286464549e-18	3.84372749172693e-17
comp45415_c0_seq2	-2.16247816528392	0.879913000520303	-0.545934025960242	6.48834920033591	83.5914492549979	5.20563467993326e-18	3.91073908392391e-17
comp60700_c0_seq2	-1.60603304390104	-0.527399219770416	-0.396484211452948	7.16604391966015	83.549710020051	5.31411929593608e-18	3.9885417604498e-17
comp61044_c6_seq11	-1.65266373612517	-0.476257382903556	0.388164579440425	7.4554017575826	83.5286809119217	5.36962942150843e-18	4.02647697416719e-17
comp59827_c12_seq2	-1.96739693917762	-0.408148878300163	0.108119591875834	4.34716438151986	83.433803365878	5.6273720775137e-18	4.21584824956803e-17
comp60832_c0_seq8	-1.51172930901408	-0.047216884339199	-0.259237745395613	5.88131511451585	83.3738389348496	5.79661206471196e-18	4.33862764511128e-17
comp57975_c0_seq5	6.31236409606681	0.651720784780198	-0.026357763436197	3.96108408933325	83.1973007236705	6.32498376014387e-18	4.7297341660264e-17
comp48472_c0_seq1	-4.76585761129972	0.510148984063108	0.754130176881474	5.99931810753147	83.1605629395166	6.44085084993079e-18	4.81193889304507e-17
comp49230_c0_seq3	6.66690635489845	-0.036152420169099	-0.721612009363545	3.69131742586934	83.0808337226443	6.69966016775577e-18	5.0006855727282e-17
comp57105_c0_seq2	-1.30345991724596	-0.401932256940043	-0.772283734144577	9.43125187514756	82.9136410014923	7.2766412000643e-18	5.42635267412339e-17
comp44350_c0_seq1	-1.22294157724084	-0.190050655777647	-0.00540706487956426	6.66363341981998	82.9100604722254	7.28952624760898e-18	5.4309650517572e-17
comp59748_c0_seq1	6.33929909060829	0.454994158160366	-0.554187612997876	3.74664536632527	82.9019380017625	7.31884074714068e-18	5.4477982641251e-17
comp55864_c0_seq3	-1.67511294223221	-0.468759993334558	0.378729348839819	5.28590278083423	82.8202436596282	7.62031454461266e-18	5.66699722005782e-17
comp56828_c2_seq1	-3.13886792333978	-0.22455279682718	0.69007969868363	4.60529809874733	82.7461947286968	7.90428723201115e-18	5.87279122847685e-17
comp54243_c0_seq1	-1.52552533065893	-0.270957799168481	0.244725922135489	6.29859376700882	82.7312391524067	7.96291245303092e-18	5.91093116705757e-17
comp58528_c0_seq2	-1.55213408034745	0.535729371777577	-0.920982100830114	6.10395508095717	82.6759934429572	8.18326711663883e-18	6.0689444874176e-17
comp52540_c0_seq1	-1.4724994009878	-0.591547238169839	-0.203591067488661	4.95951109729187	82.5980955985213	8.5043694480024e-18	6.30131798405004e-17
comp50660_c0_seq1	-3.07824672919229	0.481000463071366	-0.126622603847246	3.96265590890072	82.4987639920223	8.93216050960223e-18	6.61224594436855e-17
comp59054_c3_seq1	-1.5221310997909	-0.487884014746925	-0.0100003016712204	4.95573048777537	82.4367552433935	9.21005224629333e-18	6.8117411960268e-17
comp50806_c0_seq1	-1.4949154256078	-0.375195455588854	-0.120822694178426	8.1637862824501	82.4292171548547	9.24441805359949e-18	6.83092550068163e-17
comp56582_c0_seq2	1.79006893898132	0.884661467730434	0.0777517253598096	5.50508269576688	82.396926626229	9.39308577815346e-18	6.93445840780619e-17
comp57669_c1_seq3	-1.06233232355711	-0.27774179437903	0.0524532889078262	8.09950971591484	82.3670375761919	9.53282622306628e-18	7.03121832249092e-17
comp51191_c0_seq1	1.67417506444556	-0.117442039335758	-0.102570054633336	6.68303284820993	82.3526137149948	9.60100376254883e-18	7.07506695447462e-17
comp56902_c0_seq1	-1.06904269816038	-0.0771803289110555	-0.177741084248215	7.61120124115711	82.3176646908676	9.76822630060093e-18	7.19175680224079e-17
comp61504_c0_seq1	-1.32449726992608	-0.542462168859914	-0.582023438740086	4.85207109377742	82.3080542466693	9.81471821727908e-18	7.21942884476082e-17
comp61290_c0_seq1	-1.3637721708128	-0.328777252457003	-0.153993070796513	5.97910157828436	82.1790424946786	1.04606759405232e-17	7.68760101304454e-17
comp59475_c2_seq1	-1.88767132077647	-0.42163645749875	0.117289487038656	5.08133016062458	82.0510062570867	1.11437623433294e-17	8.18218637273804e-17
comp54298_c0_seq1	-2.13577186627399	0.342791985403108	-0.0337370180676995	6.24376942873899	82.0410177608459	1.11988905945368e-17	8.21522236735888e-17
comp35922_c0_seq1	-1.4361343122562	-0.058954465236405	-0.686298936997939	6.53094300928367	82.0168408796775	1.13334582737562e-17	8.30642068418337e-17
comp50544_c0_seq1	-1.56592418995928	-0.706139118888434	-0.0762556085610392	7.04846594693908	81.9766279399094	1.15608719921555e-17	8.46544068368675e-17
comp54899_c0_seq1	-1.86363511415742	-0.159780716348426	-0.0472105182455609	4.544483612597	81.9046300406139	1.19794928900866e-17	8.76405860713378e-17
comp57942_c0_seq1	-1.2927621631038	-0.166058737916389	-0.0629808279721162	6.81781933769206	81.8067855902901	1.25727895231006e-17	9.18981351436012e-17
comp57852_c1_seq4	-1.57173196546355	-0.113879299376446	0.0435635428790528	5.20995476242443	81.7981700936945	1.26264175195017e-17	9.22069733451181e-17
comp46878_c0_seq1	-2.90686543586402	-0.158027090170698	0.402310143791899	4.05530994929321	81.7954915324817	1.26431370386201e-17	9.22459665482036e-17
comp57916_c0_seq1	-1.43521234281294	-0.622800871737143	0.306586296546881	6.59863446241708	81.7472253557001	1.29482347683047e-17	9.43870422948544e-17
comp45583_c0_seq1	-1.19093578985267	-0.163135017280051	-0.0255548526307716	6.80519343976466	81.7313595939719	1.30501233937154e-17	9.50442949051723e-17
comp59767_c0_seq3	7.09486704847166	-0.450361189431837	-0.501190781069056	3.90407070212431	81.6971167141776	1.32727684352263e-17	9.65790493141332e-17
comp55729_c0_seq1	-6.91056449986736	1.65649108980211	-0.487923853574747	3.70903739065609	81.5837663814798	1.40372122931368e-17	1.02049903899701e-16
comp44907_c0_seq1	-1.26303246890699	-0.100783456298589	-0.179632017673743	6.72613043489129	81.5081332259351	1.45716175391208e-17	1.05840082233076e-16
comp60394_c1_seq1	-3.13447153498223	-0.296586810388382	0.284368629388577	4.63319629882053	81.4723223429892	1.48316966016623e-17	1.07632706045725e-16
comp60962_c7_seq4	7.14149694321312	-1.27052445133007	-0.0919391817255445	3.81699850131771	81.3338875239261	1.58814826524535e-17	1.1514785186117e-16
comp59545_c1_seq1	-4.0722122643067	0.600981414541615	0.418098619490896	3.76360257197832	81.2692433977279	1.63968256758971e-17	1.1877807768438e-16
comp57779_c0_seq3	-1.71533167308177	-0.893730745411391	-0.0352491253936022	4.20902864438277	81.2106513438015	1.68783501040016e-17	1.22157058877712e-16
comp54037_c0_seq1	6.90223466936773	0.385659943677207	-1.47024084901124	3.88282408951465	81.1808280118433	1.71288490630994e-17	1.2385945629392e-16
comp57754_c0_seq1	-3.96347942739712	0.345286605490924	0.237955802011269	3.65203071511325	81.0933816045874	1.78849801222425e-17	1.29211808262832e-16
comp56956_c0_seq1	-3.96577762420068	0.0495946109299926	-0.191965367469214	3.6272009847264	81.0220451820263	1.85264587548739e-17	1.33727047788965e-16
comp56090_c2_seq3	-1.29412387049692	-0.0957471733943356	0.0832360718518578	6.34188394207023	81.0182958214718	1.85608032727667e-17	1.33855757410184e-16
comp35653_c0_seq1	-1.26833273412533	-0.299996955380218	0.0422626129557108	7.19225644554259	80.9822205959766	1.88945257638388e-17	1.36141356303713e-16
comp60014_c1_seq2	-2.88659255241127	0.119003265369101	-0.471840114067246	4.41056691999533	80.9593907291691	1.91088113334696e-17	1.37563076970786e-16
comp60902_c1_seq2	2.95214658241836	-0.413656563231866	0.68969017868489	4.25824341952663	80.9411537995628	1.92817308987916e-17	1.38684747706837e-16
comp48218_c0_seq2	-1.65132035884445	-0.126017793845349	-0.0768687943267792	4.94742143713489	80.8921205032804	1.97544532858349e-17	1.41958863772143e-16
comp61496_c11_seq5	-2.1585863633592	0.0781521663109557	0.0456720097101041	4.77012756466007	80.7418723949486	2.12763395871745e-17	1.52759972270714e-16
comp50440_c0_seq2	-2.15874043836863	0.222193340785677	-0.315524806307992	4.95905536224785	80.6824394331282	2.1910210067113e-17	1.57171825490281e-16
comp65685_c0_seq1	2.08754909719157	-0.694273386281823	0.102845285631213	6.53330812831432	80.5654234385224	2.32139273139403e-17	1.66376741650575e-16
comp51189_c1_seq2	-1.06584081870261	-0.409833080609996	-0.867358327235785	6.76748324489833	80.411537598378	2.50472063128292e-17	1.79357468526319e-16
comp57379_c3_seq2	1.58620679904285	0.0382850845707057	-0.362702002831277	7.23010051815058	80.3110905835239	2.63212299385067e-17	1.88314112869846e-16
comp54885_c0_seq1	-1.22348199570169	-0.387625307451603	-0.0441658492811245	6.83196417872023	80.2767536762674	2.67714388859513e-17	1.91366211295874e-16
comp55217_c1_seq1	2.96346113245783	-0.476613528393455	0.936512883540076	4.53893076650014	80.1309217485547	2.87708954577866e-17	2.05477426062395e-16
comp54358_c0_seq1	-1.95113964061465	-0.165474434364792	-0.231212622810391	4.59429715160366	80.1090406231781	2.90835173530785e-17	2.07527281394414e-16
comp59869_c0_seq2	-4.03956718415252	1.42841697429789	-0.431869122316993	4.59801635117964	80.057780836994	2.98292412129905e-17	2.126612394657e-16
comp58116_c1_seq4	6.3536347501426	-0.470742732828626	0.626940751951871	3.76447112559129	79.985642564969	3.09111951139766e-17	2.20181149028026e-16
comp50746_c0_seq1	-1.39976974409225	-0.750083088422664	0.115312105212015	6.06709099606767	79.9786084361735	3.10187720554713e-17	2.20753438350878e-16
comp59841_c1_seq18	6.41414244529979	-0.357446473255051	0.0799502263212766	3.65753103557129	79.9442920553567	3.15489830945111e-17	2.24329874529918e-16
comp58179_c0_seq2	-4.25716791236607	1.27277282225462	0.29241658304992	3.8373915460334	79.8724794685156	3.26880364318957e-17	2.32225436737026e-16
comp55970_c2_seq3	-1.46256034130868	-0.182957653225363	-0.108837038799753	5.15955838170484	79.8170181083711	3.35957951361982e-17	2.38465425021035e-16
comp61051_c0_seq1	-1.21709627844305	-1.28024230063695	-0.51799926759089	4.34355328488974	79.7775652041968	3.42568359351234e-17	2.42944804978224e-16
comp56269_c0_seq1	-2.06923821955661	-0.185938337715205	-0.484365689197631	5.24667321585459	79.7730081768041	3.43340226544388e-17	2.43279359822448e-16
comp45955_c0_seq1	-1.00122060604677	-0.190663393287446	-0.231918250889237	7.06096723769968	79.7308071813089	3.50571327785023e-17	2.48186129521869e-16
comp35940_c0_seq1	-1.31728612424226	-0.182657631652027	-0.679437169618441	5.82525300890968	79.6469923445615	3.65387504308213e-17	2.58449486031621e-16
comp51259_c0_seq1	-1.04949335288119	-0.368988153006889	-0.0239051955701882	6.35526233433931	79.6305716677705	3.68362749945355e-17	2.60326804800091e-16
comp54522_c3_seq9	-1.31695276168021	-0.586457857623343	0.278553712956488	6.04832004107369	79.5684290168134	3.79843232958001e-17	2.68206380344735e-16
comp60387_c1_seq1	-2.80693187892555	0.431572698124229	-0.458522194462836	5.68179058142933	79.4281877627683	4.07083614574517e-17	2.8719058135257e-16
comp59433_c7_seq1	-1.57193623392519	-0.479103587084364	-0.586767631575256	5.03491039101047	79.405902296378	4.11588654375395e-17	2.90116315857996e-16
comp26726_c0_seq1	-2.03215001991413	-0.116630495660501	0.106565985879795	5.6355645195132	79.3903041788246	4.14771454281442e-17	2.92105769626879e-16
comp60875_c11_seq1	-2.2141051088555	-0.239702213573	0.391779675375388	4.14454530399712	79.380449841626	4.16794904755839e-17	2.9327599808601e-16
comp59494_c0_seq1	-2.12025875672625	-1.03283300852508	-0.964202331578508	3.60608090456387	78.956446674128	5.138766240282e-17	3.61273539841508e-16
comp58747_c0_seq1	-1.0852548376971	-0.527507687260554	-0.169339034566799	7.68159244648776	78.8580726505348	5.39456469514027e-17	3.78928435171638e-16
comp61473_c0_seq1	-1.74516382422263	0.0668754263292517	0.317358485822276	5.78681423662132	78.7475637757052	5.69712878206505e-17	3.99834856341292e-16
comp56675_c0_seq1	6.14881810673643	-0.111336671245317	-0.327285619303095	3.40109627791469	78.6158331615813	6.08003851171245e-17	4.2633903266385e-16
comp18939_c0_seq1	-1.08917699547449	-0.402558019425605	-0.0279727237804615	7.05519264494145	78.5740309083474	6.20684517868845e-17	4.34854684688406e-16
comp50567_c0_seq2	-2.00929526646358	0.172343735504994	-0.179353144062259	5.44805161603053	78.4913011357091	6.4656518603948e-17	4.52595630227636e-16
comp57599_c0_seq1	-2.11548341852058	-0.465006941110503	0.292131976118297	4.76231699390226	78.4874323239523	6.47801542532176e-17	4.53069827762366e-16
comp51104_c0_seq2	-1.72678308735468	0.168080467677822	-0.259785760275479	5.32170039885021	78.4442138551859	6.61774584040164e-17	4.62443515364618e-16
comp50371_c0_seq1	-7.14410533871071	2.32335570178582	-0.97392225422713	4.11301845839774	78.3997853346175	6.76452984499789e-17	4.72095344964862e-16
comp57616_c0_seq1	-3.74952611796683	0.166450365472264	-0.595364420752856	4.22445682084902	78.3988917299089	6.76751530778645e-17	4.72095344964862e-16
comp50602_c0_seq1	-1.03595629785435	-0.725488824744849	-0.517123827135155	5.79673998438721	78.3513615650579	6.92822273963242e-17	4.82890572033193e-16
comp60749_c0_seq7	1.85401405394413	0.347826985046585	-0.237991917612014	5.9009020054256	78.3487686722787	6.93709866957526e-17	4.83093830030731e-16
comp60146_c12_seq4	-1.00828739836244	-0.359870733272501	0.0440552984735408	7.02337953508374	78.3302370911573	7.0008673678817e-17	4.8711614492746e-16
comp58706_c2_seq1	-7.3086250593043	1.49380125680267	-0.994766890878265	8.95613059780378	78.1935166327917	7.48980160986634e-17	5.2068895239774e-16
comp53933_c0_seq2	4.27114090172531	-1.09200768210839	0.829429441876827	4.32464099605893	78.1276303994438	7.73746673547416e-17	5.37445632885635e-16
comp56225_c0_seq2	-2.21665893458561	-0.420476716355876	0.827763931088575	4.48084955363932	78.0758269223484	7.9379306631106e-17	5.50897824958686e-16
comp54485_c0_seq1	-1.27553784223828	-0.22512767604498	-0.881549980511338	6.91280718035443	77.9684374997484	8.37018619740963e-17	5.80399737520979e-16
comp57427_c0_seq2	-2.44899233857374	-0.664406483729216	0.616393940358664	4.31290114193654	77.9176444250548	8.58275440738393e-17	5.94630830993625e-16
comp44592_c0_seq1	-1.89613243701525	0.548593713439253	-0.38363143673953	8.86372786815139	77.9072705658834	8.62682807161053e-17	5.97173939782024e-16
comp60510_c2_seq12	-1.27686056389304	-0.45899365348229	-0.574072531622273	4.66775552416188	77.8979176358175	8.66675820180119e-17	5.99426126141642e-16
comp55812_c0_seq1	-1.73064914386516	-0.263266341138261	0.322886997447541	4.77999132959561	77.8877327746336	8.71045023770887e-17	6.01934438421723e-16
comp56722_c0_seq1	-1.72577049778312	-0.169935941045089	0.063907310803439	4.82602156011418	77.7992374943578	9.0994754958108e-17	6.28282354080429e-16
comp50779_c0_seq2	-1.72888714550887	-0.2537753572016	-0.403982390007389	5.11042337610632	77.7717455338032	9.22383057845037e-17	6.35965616835497e-16
comp57978_c0_seq1	7.23570288053168	-1.10912726891564	-2.38055978522935	3.6367765755493	77.7711717117988	9.22644418206938e-17	6.35965616835497e-16
comp35670_c0_seq1	-0.994176694364287	-0.609156437486287	-0.592520473801074	6.58787654238358	77.7547475210734	9.30156658926846e-17	6.40598970030672e-16
comp60069_c2_seq1	-1.80165403482554	-0.513689616450225	-0.0469658599885425	4.53209590898539	77.751798756948	9.31511850653041e-17	6.40987696213374e-16
comp59906_c0_seq3	-1.11221768209976	-0.676205556128588	0.0111678751364972	6.91856029775516	77.6427039147164	9.83061510130725e-17	6.75886056074611e-16
comp51171_c0_seq1	-1.03531599716458	-0.315550952703741	-0.794956753989932	5.84114132216627	77.6279271474445	9.90259737402861e-17	6.80258087405728e-16
comp60343_c0_seq1	-7.00670813194928	1.41256182260392	-0.484223645944072	3.79891282628182	77.6208312552157	9.93735071764711e-17	6.82067442144348e-16
comp60890_c0_seq3	6.22900934972442	0.588565222759979	-0.711714654775387	3.65423051858167	77.4982000083064	1.05575913157875e-16	7.24025678559842e-16
comp59670_c0_seq10	2.36639647070049	1.60152919880791	1.37112638670164	3.93651998797042	77.4685697424923	1.07131701557799e-16	7.34074026058766e-16
comp61325_c0_seq1	-1.16007361074963	-0.47077085939117	0.26400832322741	6.43131524945891	77.4494797616065	1.08146172625855e-16	7.40399387926675e-16
comp54922_c0_seq1	-2.02568886317061	-0.246331243859117	-0.268307457067386	5.02632957450859	77.4141459713753	1.10049269873512e-16	7.52792727084125e-16
comp55945_c2_seq4	-1.48730142172357	-0.0710848358133523	-0.0436274466720352	5.98158463006405	77.4041529735683	1.10593545909885e-16	7.55877979043447e-16
comp59484_c2_seq1	-1.00927824238217	-0.552362299839537	-0.153788373253211	5.87833876465814	77.3767772758006	1.12098406663792e-16	7.65517847023335e-16
comp14958_c0_seq1	-1.29225230220975	-0.229257761930251	-0.266570798368677	6.83186424252207	77.3130307958829	1.15682402678463e-16	7.89327909184868e-16
comp49266_c0_seq1	-1.25131501816419	-0.373440986520724	-0.121607457880712	6.36821170103585	77.3088361507021	1.15922214138466e-16	7.90298963672335e-16
comp61215_c0_seq1	-1.66924728907592	-0.0449244549220997	-0.61948356448678	5.13690740646838	77.2028357175019	1.22150108521747e-16	8.32057798048136e-16
comp68770_c0_seq1	-1.45116164485778	-0.405621138880526	0.305598832937044	5.61803683563679	77.1855711124997	1.231956760368e-16	8.38475356804617e-16
comp61066_c0_seq1	-1.93679377820468	-0.100764410951529	-0.590079317658795	5.04018213847401	77.1473310565468	1.25543509802751e-16	8.53737995353273e-16
comp60219_c0_seq1	-1.27757563390658	0.0522497925035647	-0.357527466769097	9.95069316392537	77.1318129002115	1.26508992819349e-16	8.59582477614116e-16
comp50884_c2_seq1	-1.73239538083332	-0.383195714734838	-0.639128672472654	4.92470674232856	76.9992089608519	1.35067754207188e-16	9.16967517255833e-16
comp35781_c0_seq1	-3.32654428212806	0.419681772614237	0.661273039068682	7.20290426190693	76.9439259748174	1.38804698991801e-16	9.41548861947731e-16
comp49975_c0_seq2	4.33346126998086	1.61406750493333	1.70573103524196	3.78122221754233	76.9365131330641	1.39313578957435e-16	9.44210594505825e-16
comp60287_c0_seq1	-1.19722041351313	-0.530781948658672	-0.864912311845931	4.97225076485997	76.9244988451759	1.40142304853663e-16	9.49033853921296e-16
comp50720_c0_seq1	-1.13069962849075	-0.412104413460034	-0.576093852332838	8.87284338800375	76.8256812558516	1.47148245522333e-16	9.95645808183668e-16
comp36441_c1_seq1	-1.28719069754926	-0.14649489161634	0.235190072567644	6.25660534065902	76.7495766463423	1.52781643136047e-16	1.032900750009e-15
comp35596_c0_seq1	-1.77157149319667	-0.120705288404763	-0.484964010754426	4.75086237639142	76.724860305726	1.54657176027124e-16	1.04470922406322e-15
comp59286_c1_seq1	-3.87273294864348	-0.96733325102721	1.12757246012197	3.52154501836799	76.7225335786422	1.54834914395417e-16	1.04503898092361e-15
comp59735_c0_seq3	3.26253050517634	0.965767062015305	2.18563648434274	3.54625755175805	76.7159173541569	1.55341443562099e-16	1.04758547546953e-15
comp60905_c0_seq1	-1.3051604457643	-0.69670085898781	-1.55263787034068	5.90350993895329	76.6762401510898	1.58414020299443e-16	1.06741816171844e-15
comp51822_c0_seq1	-1.4835122253296	-0.565031232590407	-0.380101867152846	6.7910672844524	76.6600060040169	1.59688628544178e-16	1.07511297589627e-15
comp46472_c1_seq1	-1.40751287287383	-0.139877853939034	-0.0989308683145407	5.84551953955242	76.5855849550498	1.6566421609632e-16	1.11441836985624e-15
comp60387_c1_seq2	-3.29040614138127	0.688321283323255	-0.688564362632225	5.18115977659591	76.4834601445395	1.74229771901025e-16	1.17106677531485e-15
comp61348_c0_seq1	-2.34663521265451	-1.32223817065053	0.966476610961647	3.85894743635906	76.477921486911	1.74706773269935e-16	1.17330000341847e-15
comp35985_c0_seq1	-3.96570740291472	0.349122768925178	0.2065841729914	3.49301949499192	76.4006526941767	1.81499099127138e-16	1.21790703437465e-15
comp57862_c0_seq1	-2.94741377063008	-0.85115107769855	0.0154520991877362	3.6647713734342	76.365956067559	1.8463439146399e-16	1.23792090753276e-15
comp55853_c0_seq1	-4.93513604388238	1.22510306258875	-0.808665896427619	3.83848833819081	76.363389576902	1.84868446516506e-16	1.23846580782049e-15
comp58668_c0_seq2	-6.83374937580029	1.46235387761654	0.700001369444104	4.16206675370793	76.3155500820619	1.89285941366528e-16	1.26701225492739e-15
comp55913_c1_seq3	5.49916470398349	0.756871486911763	-0.495483131021924	3.30729806537957	76.3133530937671	1.89491326316668e-16	1.26734050422683e-15
comp15334_c0_seq1	-1.13530155011706	0.0595079692476685	-0.102322928099475	7.53987475668099	76.28034633035	1.92603907584988e-16	1.2870958572827e-15
comp43255_c0_seq1	-1.1251479847431	-0.262801628302066	-0.805943692287011	9.90562894918918	76.2223555213294	1.98196811316052e-16	1.323380026794e-15
comp45703_c0_seq1	-1.70239443037359	-0.0440483753155404	-0.168822592395453	5.93976596823975	76.0813079513064	2.12487176070042e-16	1.41763049318828e-15
comp61161_c1_seq10	5.66005537994139	1.00428068921217	-0.873641784602575	3.43186794399278	76.0155701026028	2.19494965186046e-16	1.463179430755e-15
comp58636_c0_seq1	-1.68126731033788	-0.432859865171194	-0.227747977571918	7.87461712306013	75.9586210954446	2.25752341461314e-16	1.50365528338982e-15
comp59973_c0_seq1	-1.94593955103997	-0.447721889125452	0.297313048728084	4.74153794876007	75.949658347039	2.26753252480084e-16	1.50908199064332e-15
comp59620_c1_seq1	-2.10740999257164	-0.360814782278473	0.154390281688378	4.25125029107735	75.9086837315532	2.31385872468969e-16	1.53864961627028e-15
comp58817_c7_seq7	-1.87026670479159	-0.156049875264772	-0.528270190088739	4.82384864435849	75.7727549733814	2.47442378335303e-16	1.64407206457866e-15
comp51150_c0_seq2	-1.86908759534645	0.0286297663153811	-0.264245603074046	4.78849683951833	75.6595852556058	2.61656943518137e-16	1.73709351691893e-15
comp51248_c0_seq1	-1.71529830827897	-0.0879893612945525	0.16608379393261	7.0434084968448	75.6402740037318	2.64162781012678e-16	1.75229419221667e-15
comp59877_c0_seq1	-3.38350413432309	-0.523809639050448	0.0542691172784461	4.189070612139	75.5535443209948	2.75715992313363e-16	1.82743567758963e-15
comp59537_c0_seq1	-1.93540982813246	-0.990646073036586	-0.133389028151484	3.66479606464783	75.5506401399289	2.76111476082437e-16	1.82856178523221e-15
comp43731_c0_seq1	-1.15183254675451	-0.0579751075962164	-0.24865211735047	6.93142593130753	75.5143753853581	2.81097930903784e-16	1.86006516563761e-15
comp15168_c0_seq1	-1.31800752280417	0.248187729964351	-0.18625205989188	8.4433573739558	75.4673013349815	2.87705188641084e-16	1.90223349031373e-15
comp61302_c0_seq4	-1.89916100686291	-0.971602354063621	0.516555596727051	5.00731865384823	75.4230013920385	2.94064807362644e-16	1.94269708922705e-15
comp55974_c0_seq5	-2.13547963943778	-0.22290591195528	-0.465494136362553	4.34227434378916	75.4167773863277	2.94969502530524e-16	1.94708696051501e-15
comp50983_c0_seq1	-1.42864066596065	-0.208463319358056	-0.661404026344961	6.3698682302914	75.2423397960623	3.21488738860488e-16	2.11926004730043e-15
comp61735_c0_seq1	-1.26568133185253	0.0947508000391142	-0.769618378155442	9.45020176107163	75.2417939319824	3.21575358768755e-16	2.11926004730043e-15
comp27432_c0_seq1	2.07736274730153	0.645964945340015	-0.685298745533262	5.31173020565745	75.2280277939452	3.23767554907552e-16	2.13197384247004e-15
comp57335_c0_seq2	-1.94886637811124	-0.179684197103025	-0.0820998031063788	4.81121501928649	75.2106175037256	3.26561473454715e-16	2.14862605829863e-15
comp35532_c0_seq1	-1.39957999145528	-0.329109693478813	0.201730509507793	5.34092442988348	75.1982896965677	3.28554342404691e-16	2.15998499556563e-15
comp56643_c0_seq2	-1.22450999860279	-0.808349871039232	-0.516453350892596	5.43433068641205	75.1951268749467	3.29067589489001e-16	2.16160606191073e-15
comp50854_c0_seq1	-1.03820563016703	-0.240961749246665	-0.21693853841957	7.39650752677088	75.1629414472664	3.3433627694483e-16	2.19443713434396e-15
comp56845_c1_seq1	-2.42382630772735	0.436930948797981	0.568663871595759	6.13256714361301	75.1323026221526	3.3943011506004e-16	2.22606837595201e-15
comp77849_c0_seq1	-9.31477340723406	1.38830465249373	2.05795425297088	4.6157477185591	75.0928363365548	3.46106052584769e-16	2.26801589511086e-15
comp57995_c1_seq1	-2.07850029431326	-0.344999220006382	0.411443568217613	5.15325118549463	74.9938675232842	3.63430158827977e-16	2.37961620957963e-15
comp58918_c0_seq1	-3.04855444716365	0.403781300675986	0.0944101156969934	6.46006349119228	74.7589257359953	4.08107038002421e-16	2.66998841811753e-15
comp46783_c0_seq1	-2.00797938099326	-0.196240284461414	0.151764874031295	4.25761371045642	74.7432163717584	4.11283104844895e-16	2.68859745796187e-15
comp59374_c1_seq2	-2.87729101632157	0.223887653374495	0.803545573892124	4.54519774395349	74.5096241103639	4.61532834068122e-16	3.01465362849009e-15
comp59652_c5_seq2	-1.7773567843705	0.0867901178736945	-0.00404744131407502	5.36743710050131	74.4228598471679	4.81722299154049e-16	3.14399432926145e-15
comp59832_c0_seq1	6.12486345654399	-0.101105244018416	-0.00267575613528168	3.5104331854569	74.3426041760445	5.01182404092045e-16	3.26837052901859e-15
comp61526_c1_seq12	-1.65310325435298	-0.131190611325883	0.284363240935452	5.32760230172703	74.3168742258832	5.07586169900535e-16	3.30747065370879e-15
comp54217_c3_seq4	-2.45769711589692	-0.232487468425643	0.289044336445873	4.10020906803442	74.2119537663451	5.34557134449378e-16	3.48041777658366e-15
comp60664_c0_seq2	-1.28223019148701	-0.476353460016965	-0.67597963861229	5.44759564805395	74.20835115533	5.35508241278354e-16	3.48381204157491e-15
comp61448_c1_seq1	-2.84037580122736	0.026836461027588	0.316814061598386	3.69182728130816	74.1871340317272	5.4114408329711e-16	3.51765351981265e-15
comp44540_c0_seq1	-1.03564956658653	-0.16937610057849	-0.133003564714483	7.81960707071982	74.0316991575495	5.84280712930729e-16	3.79501559216065e-15
comp15457_c0_seq1	-1.25272457272728	-0.0584296505557673	0.015207598712344	7.89776514361342	74.0133285554488	5.89600964939759e-16	3.82650554187485e-15
comp56031_c0_seq2	-1.96855283174248	-0.149618191606362	0.0934814191870685	4.48265671112045	73.9317075804663	6.1383067169521e-16	3.9805691398091e-15
comp54011_c3_seq2	-1.88278562194832	0.268073502564845	-0.634419732900308	5.1074041159749	73.9162118429662	6.18541877674329e-16	4.0079140371128e-15
comp57525_c0_seq2	-1.4520269231164	-0.623716045003253	-0.258145064037952	4.41735265345666	73.8998040602319	6.23569780606594e-16	4.03726568817656e-15
comp35913_c0_seq2	-1.54317471772873	-0.131985809611666	-0.183311124966314	6.21661595574662	73.7739373588136	6.63523251663602e-16	4.29251354986844e-15
comp55452_c2_seq1	-1.07389358405683	-0.018221694865074	-0.192692020055663	7.03578451237463	73.7687271603492	6.65231169616321e-16	4.30013067058206e-15
comp60552_c0_seq2	-4.73419635812758	1.17384737017721	-1.47154306001583	4.2306732748486	73.7139184863294	6.83466063762725e-16	4.41448279909215e-15
comp14122_c0_seq1	-1.47121308401117	0.0322664800333027	-0.28836206893466	5.09128115684096	73.5675156954521	7.3466184762385e-16	4.74137654206921e-15
comp47134_c0_seq1	-3.5155902860044	-0.520215867172669	0.664914131137061	5.42310889773649	73.4777542482096	7.67928458849733e-16	4.95213053893074e-15
comp57738_c2_seq5	-2.40669660635567	-0.338281673793611	0.73206675131076	4.68373772162439	73.3862950101845	8.03373513750697e-16	5.17658640895322e-15
comp58935_c0_seq4	-1.31740501290015	-0.482322369179752	0.139880473471311	5.97668055487223	73.3589885614404	8.14269810502627e-16	5.24262993163963e-15
comp57301_c2_seq4	-1.08557344415229	-0.0748508040388597	-0.145435566081237	7.25556302270763	73.2805793436587	8.46386149379036e-16	5.4450842276718e-15
comp60943_c0_seq3	4.60864556173109	-0.3433213881403	0.0507357263476876	3.54180232132081	73.1987649708542	8.8124793099874e-16	5.66486576421553e-15
comp56406_c0_seq5	-2.08089965451106	-0.555832794587381	0.860216478724643	4.60027692281446	73.1315773317881	9.10947931247693e-16	5.85114416061315e-15
comp46696_c0_seq1	-4.7662382499502	-0.162683105957695	0.47324600275865	4.39102689427268	73.0532100552794	9.46856351939429e-16	6.07697354617657e-15
comp49107_c2_seq2	-1.4612288916732	-0.635647036981833	0.140068795454321	6.21888536118428	72.9493616511216	9.96629462194438e-16	6.3913595099273e-15
comp35621_c0_seq2	4.71657503911746	0.268433535944848	-0.471952509174285	3.65804198709666	72.8910973810883	1.02569140697453e-15	6.57253323710323e-15
comp57086_c1_seq2	-1.55059353752044	-0.340651652141495	0.317770514366472	6.0979916799014	72.8059342418898	1.06970124486693e-15	6.84912977163615e-15
comp50582_c0_seq1	-0.892699330714058	-0.563164675618987	-0.759253047670025	13.1322972350586	72.799756622897	1.0729661345455e-15	6.86461206521378e-15
comp59336_c0_seq2	-2.62525782714274	0.309232838720694	0.123912085430734	4.45856788603719	72.7757773699027	1.08573389319802e-15	6.94081935194253e-15
comp58547_c0_seq1	-2.59062182086746	-0.24178550404623	0.110614400349917	3.52563414991562	72.6882724991482	1.13362780057623e-15	7.24128207365715e-15
comp55789_c0_seq2	-1.43257327286636	-0.550266505805697	-0.212366254841321	4.38058297824007	72.6701591280872	1.14380257338795e-15	7.3005225668368e-15
comp15374_c0_seq1	-1.74490570411518	0.755209143499901	-0.399989907729181	7.97733787144648	72.6331100695003	1.16489924640362e-15	7.42932595700058e-15
comp27235_c0_seq1	-2.04169897845259	-0.547303250729057	0.516277581014573	4.56940647291801	72.6019461607725	1.18294566875067e-15	7.53848867208567e-15
comp61056_c10_seq1	-2.53354240546466	-0.408074700747522	0.190888561959359	4.34745782533041	72.5141824325544	1.23528382031446e-15	7.86583711505815e-15
comp54834_c0_seq1	-1.66168267102829	-0.215919382893961	0.123523604119965	5.17342656878019	72.4864565035272	1.25229463735659e-15	7.96789664867544e-15
comp35536_c0_seq1	-8.09579212272847	0.525432356159107	0.1992858665509	5.8079569062768	72.4513396805016	1.27417654909598e-15	8.10076478978196e-15
comp59315_c0_seq1	-1.6753394723027	-0.333528835993859	0.525683187324861	5.03010958196444	72.4038795048859	1.30435839500247e-15	8.28615137138719e-15
comp59441_c0_seq4	2.78773647827881	0.266978462534623	0.151222885025825	5.06946329089067	72.3698276464499	1.32645269768686e-15	8.41991038954554e-15
comp63014_c0_seq1	-1.49210452852533	0.0652659195681412	0.121632954509378	7.35416190328519	72.3479018043156	1.34087672385693e-15	8.50480964286719e-15
comp61077_c2_seq1	-2.03271684191826	-0.553999775913406	0.290480861993494	4.09830609501704	72.2850576829498	1.38309365696545e-15	8.76572101904762e-15
comp54158_c0_seq1	-1.44452167478261	-0.376763923156893	0.00769542247568788	5.06177134260569	72.2438694361539	1.41148097371294e-15	8.9386443538415e-15
comp35085_c0_seq2	7.01662669299329	-2.40098657127803	-0.833052013244319	3.51536067785996	72.1923533522401	1.44780751135664e-15	9.16153605546987e-15
comp59099_c3_seq3	-1.29354987132145	-0.387971396456991	-0.0444897358958187	7.43137137995306	72.1792811970621	1.45717305288366e-15	9.21360746230497e-15
comp61414_c2_seq2	-2.9667193459556	0.573169083582908	-0.295948569334718	3.65229600716074	72.0890874544852	1.52346392088188e-15	9.62525217667072e-15
comp57269_c3_seq3	-2.20807372633317	-0.396827972201414	-0.319849258847782	5.40490590953291	72.08593630855	1.52583368070371e-15	9.63271636743322e-15
comp58267_c0_seq1	-1.6548960412782	-0.237291379669905	-1.01739753251859	4.81280210891631	72.0656193417863	1.54120138962272e-15	9.72216222901306e-15
comp55685_c0_seq2	3.40771034216917	-0.564624256717323	1.61511970251911	3.63888704659508	72.0201120624703	1.57618672299228e-15	9.93512408753922e-15
comp58743_c7_seq2	-1.90013971055168	-0.218852095712882	0.379416092055042	4.47048957494929	71.9907138715157	1.59920857650355e-15	1.00724046007287e-14
comp58716_c1_seq1	-1.56090632519822	-0.257687227710124	-0.233361004996997	5.17861782576175	71.9152961921592	1.65981744673223e-15	1.04460250180213e-14
comp56521_c1_seq1	-1.28343450549485	-0.268023990235625	-0.179086597562171	5.79733516948958	71.905337308701	1.66799060435685e-15	1.04893187268554e-14
comp60606_c0_seq11	-2.38771509375372	-0.108547754112332	-0.19564957322991	5.3996732647186	71.8771167285771	1.69137013871627e-15	1.06280979414218e-14
comp70612_c0_seq1	-7.55795080100576	2.45264107357566	-0.131450051778054	5.70126824647471	71.764959598043	1.78757074858327e-15	1.12238950333199e-14
comp60026_c0_seq1	2.69213849427505	1.20115573927901	0.373219122610868	3.78825702918376	71.7113530705554	1.83546382810687e-15	1.15156886924414e-14
comp15206_c0_seq1	-1.11877073834771	-0.480019552471243	-0.662272351676667	8.86874035958763	71.6892878641459	1.8555480025344e-15	1.16326930460509e-14
comp50820_c0_seq1	-0.907033562938033	-0.384248516283107	-0.164177565207028	7.92987711204541	71.4558779863156	2.0819359143251e-15	1.3041864390664e-14
comp56064_c0_seq3	-1.81919082154048	-0.0643240057443184	0.497485723108706	5.54090572369229	71.4435088017316	2.09467529180438e-15	1.31115350697809e-14
comp51167_c0_seq1	-0.983673655324248	-0.209728304357089	-0.0579081756596572	7.57546165832293	71.3783857012953	2.16304378473421e-15	1.35290377461848e-14
comp58140_c0_seq1	-1.75364915831602	0.0738489077174488	-0.0313389757836436	5.73194333152029	71.3287830817463	2.21661104188206e-15	1.38533917544302e-14
comp47894_c0_seq3	-1.65606795744191	-0.261502311908433	0.238824196419549	5.0940043167701	71.2888146160112	2.26073731013483e-15	1.41182870847095e-14
comp59096_c0_seq2	3.91747472890205	2.70359968639539	-1.11648728681903	3.59202852690256	71.2813469839634	2.26907861372708e-15	1.4159469778962e-14
comp56997_c0_seq1	3.29909275747421	-1.25477597446385	0.213087702889431	4.83578864840819	71.2525205598194	2.30156717567823e-15	1.43511565584983e-14
comp54165_c1_seq1	-1.42990780015307	-0.361872536688334	0.0382873601032792	5.25649459638341	71.1956534350136	2.36702853470027e-15	1.47479887027521e-14
comp57015_c0_seq1	-1.77736054297868	-0.172273680162779	0.171427516747056	6.55798925755412	71.0746126078301	2.51262490663858e-15	1.56431163542337e-14
comp56253_c1_seq1	-1.10200397610483	-0.524901440563132	-0.0372617905293283	5.5832898424864	71.0668746825715	2.52223138910524e-15	1.56908730929294e-14
comp57722_c0_seq1	-1.33778908875498	-0.623413625771229	-0.677252564463672	8.26683821926868	71.0452923427042	2.54921989150794e-15	1.58466076998185e-14
comp35736_c0_seq1	-1.17086720374868	-0.356052078253587	-0.105012151974892	11.8219128090966	70.8759479327295	2.77125047371514e-15	1.72136063907547e-14
comp60684_c1_seq1	-1.11430532449202	-0.347353638877806	-0.102036417551597	5.62336654916076	70.8416625215332	2.81850326363018e-15	1.74937116806939e-14
comp61701_c0_seq1	-1.5914602148614	0.0293952369636925	-0.130374285718383	10.1313120093752	70.6959628848375	3.02846026589147e-15	1.87824781295457e-14
comp35500_c0_seq1	-1.67770359529045	0.149959387395808	0.0746966402276283	5.66474557116846	70.6658086882285	3.07382866757172e-15	1.90492776600431e-14
comp57939_c0_seq3	-1.13186740404736	-0.574363331013123	-0.321410037460846	5.58031343194244	70.6618629922965	3.07981520035075e-15	1.9071796802172e-14
comp58782_c0_seq2	-1.36247492666998	-0.209503380484146	0.0114262641378071	5.01555812251251	70.6436757475305	3.10756047905281e-15	1.92289200329787e-14
comp57703_c2_seq1	-1.78242916742299	0.0306900866506936	0.233810830433483	5.76699044360037	70.5826796680847	3.20244918023792e-15	1.98009558009219e-14
comp61279_c0_seq3	-1.52174396006713	-0.45831611381849	0.191781228621362	5.30217080291253	70.5240064658829	3.29645613786943e-15	2.0366671839611e-14
comp50651_c0_seq1	-1.42993734974738	-0.429270331274637	-0.512315337529715	4.55225249886499	70.4988824854159	3.3375489127811e-15	2.06048526176722e-14
comp55606_c1_seq2	-6.67232910072553	2.39908758270173	-0.283009517672326	3.95596401991636	70.4878021146778	3.35583430002983e-15	2.07019732389968e-14
comp57262_c0_seq4	-1.32241558007906	-0.409878727383622	-0.588084733421323	5.16841364813533	70.4580978963019	3.40534928399068e-15	2.09914534570558e-14
comp57003_c0_seq3	3.79241771258111	-0.43253496551899	-1.04151034454889	4.68978871262974	70.4469439367704	3.42413022768563e-15	2.10911851258509e-14
comp56093_c0_seq1	-1.56429537202946	-0.218144101528556	-0.186528923128197	5.09320519492378	70.4227620872103	3.46520375099881e-15	2.13279738842797e-14
comp56538_c3_seq3	-1.59641202419365	-0.231253793014687	-0.0577560797723043	6.22147627278345	70.358948760246	3.57597254466909e-15	2.19930451040119e-14
comp54811_c0_seq1	7.40982250139811	-2.95866498684938	1.79358237217785	6.22602308829124	70.3375890975804	3.61383429298411e-15	2.22090529029031e-14
comp57222_c1_seq4	-1.85708956238637	-0.195428442064867	-0.360902609113355	6.55697244649149	70.3168165522351	3.65103963425365e-15	2.24207024812576e-14
comp58662_c2_seq4	-1.01183830358185	-0.0548482352143554	-0.418808935940127	5.93732771924364	70.2764540416036	3.72443054266611e-15	2.28540756842176e-14
comp59460_c4_seq2	-2.21247805970987	0.390407670818579	0.5752489072764	5.12531557268715	70.207993822405	3.85229885909269e-15	2.36208279514413e-14
comp60127_c0_seq1	-2.97252685791369	-0.106454879013021	0.249104955519447	4.91180266649038	70.1110013086796	4.04100738804359e-15	2.47591881235687e-14
comp63385_c0_seq1	-1.08100351963305	0.0930276211050837	-0.291953507814404	7.39571511101714	69.97883139239	4.31311921315568e-15	2.64064534303927e-14
comp14877_c0_seq1	-1.3468262967265	-0.046147258747458	-0.224052851960168	7.06130140540083	69.9118579221343	4.4579208173213e-15	2.72723819963822e-14
comp54599_c0_seq1	-1.46237794763347	-0.924387766345178	-0.559718366024195	4.14715508334183	69.8487665683028	4.59877113094622e-15	2.81128497642911e-14
comp54428_c0_seq1	-4.0215551670273	0.671306731669842	0.0856794429381968	6.01338035825254	69.7615201437268	4.80090569083748e-15	2.93264065786953e-14
comp51760_c0_seq1	-1.38598844651929	-0.142665843002077	0.00150067729815008	6.12015148060337	69.7174680966344	4.90631654896692e-15	2.9947742429161e-14
comp59322_c0_seq1	-1.42080502288489	-0.629578278084188	-0.450186326422605	5.41838114630754	69.7114541273608	4.92088555697518e-15	3.00140694694062e-14
comp62123_c0_seq1	-1.00362620251952	-0.167401581991401	-0.628007721123481	8.44469042196292	69.6777848843194	5.00325264064557e-15	3.0470738099134e-14
comp59125_c0_seq1	-3.25894249539361	0.0744033901536442	0.701669527450781	9.77938514119593	69.6777755568443	5.00327564889555e-15	3.0470738099134e-14
comp56243_c2_seq2	-1.30832220354132	-0.570240121762577	-0.0313750241628053	4.95838623984074	69.6761177958486	5.00736655792365e-15	3.04727577466435e-14
comp58823_c0_seq6	-1.25580304405763	-0.478143793092134	-0.591402711348344	7.02962465484113	69.6283099076317	5.12679315704417e-15	3.11761330315079e-14
comp61407_c11_seq1	-1.05389182258717	0.129619970985139	-0.325650485624251	8.73957242337272	69.6036172054919	5.18958762264913e-15	3.15343307865022e-14
comp35468_c0_seq1	-1.39209621417389	-0.33991306639685	-0.227810169160746	4.90880279739792	69.5795462022938	5.25154102971784e-15	3.18868850838148e-14
comp52959_c0_seq2	-4.30579741155213	-0.0669539765044408	0.180030837416287	3.70123701871642	69.55049204077	5.32730550261046e-15	3.23227083863476e-14
comp58070_c2_seq2	2.72627800477809	1.66771245910787	0.540746056844059	4.14653675595608	69.5478910967588	5.33414103086168e-15	3.23399754645959e-14
comp57116_c3_seq2	-1.47919336217481	-0.88655328310623	0.197766596986663	4.83694748255791	69.5288954106831	5.38433005197646e-15	3.26198650234089e-14
comp60746_c7_seq7	-1.70972011492398	0.152161317062936	-0.170029513857546	4.80847672187033	69.5248052881022	5.39519828685951e-15	3.26612974707118e-14
comp58833_c0_seq1	-1.64578338628581	-0.618703499944488	-0.272490089295175	5.04435334293511	69.4438002933525	5.61501939843512e-15	3.39666770475486e-14
comp60671_c1_seq1	-2.88502428840147	-0.238454407337662	0.464659415291745	3.51920337882859	69.4420748521069	5.61979779290154e-15	3.39702318488142e-14
comp58991_c0_seq1	4.47153434650089	2.07851967050137	0.49792292215126	3.80328572650397	69.4276936949836	5.65978307071159e-15	3.4186439322793e-14
comp55545_c0_seq1	-1.18830721653317	-0.35660329795002	0.0335569493774072	6.34770653223654	69.3314486222298	5.93480201393964e-15	3.58209271221107e-14
comp50721_c0_seq1	-0.836054948032912	-1.0203669674746	-0.244336057570191	11.2415618826326	69.309851261638	5.99832870448486e-15	3.61774199989243e-14
comp56994_c0_seq1	-1.08040838499213	-0.345914270331837	-0.115333859033817	8.90563287257662	69.2969480792344	6.03660614378492e-15	3.63812114509447e-14
comp57511_c0_seq3	-1.46461448752825	-0.122357255418054	-0.234126466395245	4.87273200083647	69.2713747461979	6.11319273902241e-15	3.6815408872597e-14
comp55868_c0_seq1	7.02191730800567	-1.88022229860856	-1.96000110887022	3.30646243991378	69.2413604122105	6.20431897884348e-15	3.73364585319267e-14
comp61432_c2_seq1	1.62054016230486	-0.169372213597362	0.562979419034986	5.0248598782713	69.1666088014853	6.43721731918385e-15	3.8709260822926e-14
comp44049_c0_seq1	-0.852566545392902	-0.456673711893254	-0.826930375800361	12.6417254269243	69.1198355008664	6.58736982303025e-15	3.95828167423894e-14
comp60189_c2_seq1	-1.73862809374731	-0.743175235933869	0.361699957560389	5.13449303065506	68.9520529156466	7.15537644639974e-15	4.29640603514935e-14
comp51093_c0_seq1	-1.65785148778787	-0.457765363749292	-0.3054446795945	4.15792411620635	68.8427222741636	7.55158897773828e-15	4.53095338664297e-14
comp59259_c0_seq1	-7.40691936497649	1.46865980095433	1.21881330482592	5.21165957719441	68.81303030092	7.66292911342889e-15	4.5943567598709e-14
comp48650_c0_seq1	3.03615241692172	-0.348678565726069	0.560548206134986	4.05659630686889	68.8046553438996	7.69462951151004e-15	4.60995320179604e-14
comp89504_c0_seq1	-1.70464902872207	-0.699875220041066	0.327477580034777	4.62722451448763	68.7808497369548	7.78545479141117e-15	4.66092293494675e-14
comp61044_c6_seq23	-1.10688021769553	-0.446669040920345	-0.018668620314291	7.44279754109685	68.6919173737591	8.13433949301746e-15	4.86619600962358e-14
comp55481_c0_seq1	-1.05281548883695	-0.0326608614326673	-0.386745711050918	7.01764587650158	68.6880344291797	8.14992350444407e-15	4.87192329845307e-14
comp59766_c0_seq1	-1.17630790357571	-0.392872916054019	-0.396676532006261	7.00375192243236	68.6516802811004	8.29728460371899e-15	4.95635880602404e-14
comp46023_c0_seq1	-1.91920951798805	0.391002746661118	-0.171595674589851	5.05937950541875	68.609019687411	8.47360880064199e-15	5.05795824285744e-14
comp49322_c0_seq1	-2.91871212993154	0.287546045798127	-0.327533603937521	4.34400320282349	68.5363486632918	8.78263901047614e-15	5.23856304774978e-14
comp60297_c0_seq1	-2.04156958124525	-0.251244437687215	-1.72714131440703	7.1609487273746	68.4094131273496	9.34969529203119e-15	5.57269338508859e-14
comp61463_c8_seq9	-2.33295456468278	-1.39218684204094	1.13960101825013	4.78307378538102	68.2408772452818	1.01595379762301e-14	6.05093422742991e-14
comp57190_c1_seq1	-1.07180366170878	-0.259453503322549	-0.447092919551054	5.41912879872358	68.1358236203497	1.06994369348941e-14	6.3678146691815e-14
comp35475_c0_seq1	-3.19662345327041	0.23488928941902	-0.796596877983056	5.27834853569694	68.1321324869799	1.07189195112496e-14	6.37472938798159e-14
comp61488_c0_seq1	-1.33919312458548	-0.430533032966566	-0.93202864861075	12.626869043917	68.0674566353622	1.10661045386838e-14	6.57638148024716e-14
comp60471_c3_seq4	6.32697282789852	-2.60797742241964	-0.64915533005414	4.26642202441927	68.0532840941102	1.1143672823515e-14	6.6176272459643e-14
comp57673_c4_seq3	-1.43800979389898	-0.297944458839029	0.205642639787586	5.66748295754799	68.0425380032667	1.120284974146e-14	6.64789897542278e-14
comp45538_c0_seq1	-1.39989195867506	-0.27883673207123	-0.817764787572298	10.0924774343804	68.0313135059652	1.12649965955416e-14	6.67988752037017e-14
comp57379_c3_seq3	4.04221748638756	-1.37766556099978	-0.866943156152784	4.23024744115352	68.0253166267586	1.12983407307808e-14	6.69476242424776e-14
comp60249_c2_seq9	5.93169320343236	-0.130498172107554	-0.512197781390336	3.23053470753611	67.9960376255054	1.14625613719981e-14	6.78710901982589e-14
comp45372_c0_seq1	-1.44144498143155	0.0534589517310449	0.0402133987547342	7.15204892658669	67.9075060406827	1.19737760698377e-14	7.08462984102951e-14
comp51245_c0_seq1	-0.838031193818547	-0.548456912909879	-0.11957522253404	7.27953794213917	67.8689363923325	1.22035599505373e-14	7.21532144121485e-14
comp49329_c0_seq1	-3.26069277215043	0.428389439718448	0.849983816799739	3.92688983475406	67.7693233715777	1.28176172528333e-14	7.57285754019438e-14
comp50489_c0_seq2	-1.50660819105252	-0.095413842844722	0.248793756654521	8.33054617558471	67.7531775610085	1.29200156565828e-14	7.62779657044865e-14
comp54576_c0_seq2	4.13978222574648	1.21413049750524	1.49847092559662	3.52772114941072	67.6756246535104	1.34233768108573e-14	7.91920614474592e-14
comp18845_c0_seq1	-1.09940360757858	-0.273140831019656	-0.376236346962536	6.51035200670547	67.5940887826391	1.39737416970546e-14	8.23790183245996e-14
comp58216_c0_seq1	-2.6626610528733	0.310494753111905	0.795423602274185	4.61552864282858	67.54950900671	1.42841331214326e-14	8.41197670573899e-14
comp57574_c0_seq1	-3.56641090530745	0.157019726394446	0.746825031449896	3.59139169004768	67.5487076319135	1.42897753809556e-14	8.41197670573899e-14
comp54572_c0_seq1	-1.73515305171587	0.258008681169441	-0.429736294342413	4.87853575658934	67.5126153479866	1.45462142352888e-14	8.55672079762342e-14
comp55879_c0_seq1	-1.12762715276687	-0.754122781781885	-0.921774897534496	5.1901695400572	67.4367768853017	1.51001395350993e-14	8.87612263027667e-14
comp15103_c0_seq1	-1.71740248546439	0.298291598123115	-0.245195668180878	7.10229905395206	67.3920377352275	1.54367521534849e-14	9.06741398232963e-14
comp57556_c3_seq5	4.20365484682856	0.504815832971998	-0.952349365475108	4.05993846006642	67.3082436550922	1.60875202311898e-14	9.44282686415819e-14
comp54461_c0_seq1	-1.18046447681121	-0.775837029106714	-0.4462344233993	4.88133124344087	67.251677347528	1.65422642628683e-14	9.70272026879962e-14
comp56847_c0_seq1	-1.36793989301683	-0.233425241111009	-0.112949835368876	6.42124032013899	67.1617864807457	1.72914872133978e-14	1.01348369741e-13
comp15269_c0_seq1	-1.05598743304093	-0.0917914727496212	-0.207450202555765	11.7539546571759	67.1328716777013	1.75396239677904e-14	1.02728462343142e-13
comp54308_c0_seq1	-1.13843803462447	0.118761572729225	-0.169217066342604	8.30029121490321	67.0695415335491	1.80956068586803e-14	1.05908295448709e-13
comp58103_c3_seq1	-1.18434600491179	-0.166321343783357	-0.0864037177338774	6.50937737356031	67.0504187172613	1.82669258745334e-14	1.06833839205605e-13
comp15340_c0_seq1	-1.22130860315666	-0.527594072295164	0.0756498993770332	7.78089235050903	67.0275298982815	1.84741169870917e-14	1.07967694518648e-13
comp54567_c0_seq1	-1.11265024463145	-0.717365206472937	-0.474296975934522	5.56641142977384	66.9564000665454	1.91331012499674e-14	1.11738414072216e-13
comp59185_c0_seq1	-6.33637550294849	0.0912952051395107	0.523556875532793	5.96849895950364	66.9475127773992	1.921707213783e-14	1.12148010618611e-13
comp47682_c0_seq1	-1.27639191277328	0.0301862605170407	-0.0840733179543991	5.99544749586416	66.9026283879553	1.96468204885284e-14	1.14573472575548e-13
comp61012_c8_seq1	-2.38690317830025	-0.412699650616892	0.404327666685504	5.91500949817616	66.8943533818279	1.97270924973278e-14	1.14958886975801e-13
comp56997_c0_seq4	-3.13394126180158	0.59558059138076	-0.489963123070217	4.86959641816957	66.8649775949386	2.00147101717917e-14	1.16551178629701e-13
comp51232_c0_seq1	3.83570416313054	1.13878674027454	-0.138269709730535	3.70462801771981	66.8583717566674	2.00799628945421e-14	1.16847221265727e-13
comp14902_c0_seq1	-1.35440929619414	-0.247113923636275	-0.709556733266163	7.22844868358217	66.7519265224433	2.11612403571212e-14	1.23036233943402e-13
comp57778_c0_seq2	-1.53910550880116	-0.118631902788687	0.0546996776046582	5.42714313024562	66.7507137539825	2.11738892611702e-14	1.23036233943402e-13
comp35585_c0_seq1	-7.99366234440595	-0.193456108808127	0.668755859268546	4.52081889007378	66.6429784032613	2.23282346150389e-14	1.29650909591336e-13
comp57104_c2_seq2	-1.23901906110986	-0.0496492982460581	-0.121335462253344	6.11357709498221	66.6364787170504	2.23998549019932e-14	1.29973674900184e-13
comp54395_c0_seq1	-1.04838086134687	-0.324865559898421	-0.145353848877399	10.0141464984896	66.6306828016596	2.24639139690756e-14	1.30252136361464e-13
comp55883_c0_seq1	-9.91539711494997	5.0137051000624	3.17876038710211	4.52393997086101	66.622278368295	2.25571289719062e-14	1.30699133271102e-13
comp60863_c1_seq2	5.72096158958817	1.75085240337777	0.210416239974069	4.17492845277671	66.5368455381706	2.35268999056988e-14	1.36220750453996e-13
comp50757_c0_seq1	-1.10523479405933	-0.216833970755896	-0.265017588112101	6.24619280742941	66.476647104796	2.42351514571249e-14	1.4022136881617e-13
comp85943_c0_seq1	-2.06778889172313	-0.340165380036529	0.40688901056709	4.71996527272597	66.4053546202158	2.51015429344976e-14	1.45130604156232e-13
comp15448_c0_seq1	-1.10858756353059	0.0225038748495903	-0.147309603788922	8.19281773135038	66.4015156470199	2.51490652676527e-14	1.45301727056017e-13
comp54454_c0_seq3	3.86131914841939	-0.88182946884502	2.76753440152026	3.52562222696127	66.3185629224575	2.61981843387262e-14	1.51255329237688e-13
comp56317_c0_seq1	-1.4275198239216	-0.453333568965163	0.0436256922454767	4.89418605241663	66.3101751232831	2.63066719009074e-14	1.51773581799826e-13
comp20176_c0_seq2	-2.50921755446664	-0.0675742763028747	0.671448809438501	4.1368060454474	66.2658617230308	2.68873172668908e-14	1.55013224584223e-13
comp48529_c0_seq1	-1.28296702882657	-0.388987030759544	-0.0100709842802485	5.24865986735462	66.2373526537907	2.72676302653788e-14	1.57094108693078e-13
comp56561_c2_seq2	-1.48520590261596	0.0450449774871345	-0.0885250770560233	5.1054229898518	66.157065339516	2.83678104451703e-14	1.63316385986187e-13
comp14396_c0_seq1	-1.8662633595329	0.0916254069871436	-0.279388562312461	4.64541224974517	66.147693975538	2.84990846111083e-14	1.63955698976327e-13
comp61528_c1_seq4	-3.41578912965358	0.674162271383807	-1.23486406659218	4.52934503496238	66.1343532823458	2.86870093277598e-14	1.64919785539589e-13
comp58437_c1_seq2	-2.52951623406508	-0.514268720384398	0.693080347834887	4.19341814301596	66.0871794464778	2.93615165442421e-14	1.68677854789246e-13
comp51066_c0_seq2	-0.972412980925147	-0.43404592220767	0.0311947992100238	5.7151533307564	66.0038609909213	3.05917879011197e-14	1.75621127993255e-13
comp53934_c0_seq2	-1.75870797151075	-0.482699058404827	0.393973422482293	4.68931469494731	65.9867503846962	3.08507491156116e-14	1.76982429109092e-13
comp56181_c0_seq2	-2.02863792474976	0.56253350010671	-2.35103740549483	4.51812767702605	65.9615946838329	3.12354531129235e-14	1.79062647053294e-13
comp48636_c1_seq1	-2.39038817941155	-0.184154309204794	0.111105674437339	3.83027070029565	65.9429597486584	3.15235239807151e-14	1.80586350097298e-13
comp50644_c0_seq1	-1.84765570732418	-0.0260913414851996	-0.167446226748161	5.65739789700179	65.8885906430338	3.23792626973524e-14	1.85357558915776e-13
comp35618_c0_seq1	-8.17300460954601	-0.241192661893697	0.701588817022459	4.72834804042683	65.8851644692178	3.24339599226706e-14	1.85539646530112e-13
comp59191_c0_seq1	-2.6079558577899	0.431623142645951	0.522803837208377	6.20709520721559	65.7912280116471	3.39701297835295e-14	1.9419031877665e-13
comp46952_c0_seq2	4.45692509428168	0.448864731616312	0.919027406621503	4.1807015064819	65.7632829310795	3.44410064691528e-14	1.96743339280446e-13
comp51307_c0_seq1	-1.14633633177313	-0.0987387877808234	-0.158655802166948	7.53503910041153	65.6839600312784	3.58134481935038e-14	2.04439303560945e-13
comp57224_c3_seq2	-1.5399803015972	-0.0459886010880047	0.132390095750985	5.34678952330369	65.622341325727	3.69171875851101e-14	2.10591641495357e-13
comp60900_c0_seq1	-1.9592175356101	-0.409450361193919	-0.0489637968119802	8.27164706649307	65.6003015398015	3.7320175048398e-14	2.12740744685172e-13
comp60840_c2_seq1	-1.22135943820042	-0.78943105269457	0.160734751401225	5.31695822880015	65.5497328232634	3.82614973761368e-14	2.17953406697797e-13
comp58797_c0_seq1	-1.42905288556008	-0.198755726187815	0.255227319361701	5.82098561732583	65.5398651760155	3.84479295935387e-14	2.18776648890575e-13
comp58489_c0_seq1	-1.39863678169171	-0.341412374360041	-0.0161134514586977	5.39059656719586	65.5392281825259	3.84599956413854e-14	2.18776648890575e-13
comp64788_c0_seq1	-1.33131876868024	-0.152385276209224	0.155956276016043	6.96867296218791	65.4964888385965	3.92782787092342e-14	2.2316577209558e-13
comp54430_c0_seq1	-4.92346361052116	0.668034109109863	1.23535430073345	4.25591548591738	65.4960563955143	3.92866465310131e-14	2.2316577209558e-13
comp60306_c5_seq1	6.08732708859114	-0.0619423206904545	-0.836012049790011	3.27187694589027	65.4618836901206	3.99535573812972e-14	2.26795193370305e-13
comp60875_c16_seq3	5.83221610169487	0.844410758404919	0.0194522266458649	3.72346547465033	65.4379649605876	4.04270735018324e-14	2.29322503712984e-13
comp56518_c0_seq2	3.75981800452235	-0.140169961581032	0.0939523714790944	3.54081973679195	65.4286866058273	4.06122623175636e-14	2.30211886955364e-13
comp48055_c0_seq1	-2.48443407324489	-0.0052729980325533	0.0267591732583449	4.00735129841365	65.1574108060544	4.64181924444868e-14	2.62939111079672e-13
comp51299_c0_seq1	-8.19372692043243	1.06616081283389	-1.4097887332447	5.81889662664627	65.1332428358866	4.69740537667326e-14	2.65902011056658e-13
comp35769_c0_seq1	-0.95209257628383	-0.144449466936113	-0.213807829659803	8.08935149972324	65.1246937862726	4.71722701503306e-14	2.66837698421898e-13
comp35800_c0_seq1	-1.00024433607646	-0.344757751302317	0.0517414180685028	7.95745406960485	65.0921156135992	4.79353140475227e-14	2.70964892377419e-13
comp45505_c0_seq1	-1.11773453839886	-0.233587907041789	-0.0575676728258746	5.83841756838504	64.9133972480452	5.23460994512206e-14	2.95691625192748e-13
comp58633_c2_seq1	-1.99389075796357	-0.120070004281825	-0.162359314691861	4.41200338324226	64.8857844645634	5.30628655921453e-14	2.99531746859283e-13
comp52714_c0_seq3	-1.40704541617393	-0.161068618008758	-0.190371309679591	6.06025105003415	64.8416372969855	5.42292628603428e-14	3.0590285646899e-13
comp57675_c0_seq1	-1.8571736631601	-0.320928011764479	-0.250394837587365	4.50309081931324	64.8365424814658	5.43655100718383e-14	3.06458153436941e-13
comp59687_c0_seq1	-2.89425355166444	-0.742395967167255	0.24992545793623	3.56482931261639	64.8246086173789	5.46859902004369e-14	3.08050477112399e-13
comp50467_c0_seq1	-2.33932410950864	-0.0806848626432021	0.30473272843229	4.36862573738233	64.7596082302617	5.64649986247346e-14	3.17850888091735e-13
comp57654_c3_seq3	-2.82260953646056	-0.16882397561863	0.681453649649109	3.88853479018779	64.7112520300153	5.78258899837863e-14	3.25285679534054e-13
comp14241_c0_seq1	-5.32743573804436	0.00315821168599557	-0.742537777779502	4.62329920800837	64.6976855864452	5.82135465498417e-14	3.27239256819013e-13
comp61488_c0_seq2	-0.943501279835695	-0.854779873982989	-0.89048070696669	9.1116814157936	64.6421958059238	5.98263765938897e-14	3.36072493880852e-13
comp57257_c2_seq4	-2.12166446755539	0.646018827555163	-0.0860319052455457	4.86798392126952	64.567203972723	6.2077236196196e-14	3.48475122303577e-13
comp58820_c0_seq1	-1.6455094902254	-0.238506299648916	-0.0700187813229182	4.66765881597071	64.5343785802397	6.30889304280512e-14	3.53909252629608e-13
comp35872_c0_seq1	-2.43936504741151	0.0591357278458976	0.503098332064716	4.91806326725982	64.4771816747672	6.48913009332681e-14	3.63768247140436e-13
comp58028_c2_seq2	-1.45909825616543	-0.686459139283591	0.0937663736059049	4.75007174620864	64.4256247725097	6.65600088763668e-14	3.72864845854754e-13
comp54033_c1_seq1	-1.16182764963717	-0.577984574010507	0.0177878041782002	5.14871823049572	64.399483595477	6.74224213621043e-14	3.77435184779846e-13
comp50852_c0_seq1	-1.45795381396708	-0.211696912358532	0.0538423430656525	5.44815453846942	64.3946415540846	6.75833847971913e-14	3.78075167126317e-13
comp58118_c0_seq3	-2.22424547913021	0.102508224840246	0.141044301838631	5.52718108045738	64.2422616474472	7.28500171021594e-14	4.07256716296624e-13
comp55266_c0_seq1	-1.24625811869553	0.0776577158122032	-0.0697436153832072	6.06309352680082	64.2201085629908	7.36491053772955e-14	4.11440143479226e-13
comp61463_c8_seq26	-1.70932083769216	-0.0185295274673512	-0.41777914176439	5.00589665313398	64.2092451303246	7.40441579593071e-14	4.13362220673653e-13
comp65848_c0_seq1	-1.12898245167307	-0.221698256849257	0.040480558562333	6.32404589360073	64.1850115539313	7.49330697269928e-14	4.18036795049555e-13
comp47936_c0_seq1	-2.10370768020972	0.00892753503507716	-0.105648037674394	4.31768731745499	64.1573317024129	7.59614513228397e-14	4.23482478970384e-13
comp54021_c0_seq1	-1.3802412937104	-0.602019754392932	0.305779133822193	5.07722417866728	64.1499178552665	7.62392830997717e-14	4.24739263784708e-13
comp55906_c1_seq1	5.79261288361337	0.986712931557441	-0.977912337687995	3.48117852112396	64.0361473683366	8.06324389503809e-14	4.48905597617986e-13
comp59678_c0_seq1	-1.57268849295295	-0.104199637128515	-0.740726834452967	5.83740269335004	64.0264993393427	8.10164291247055e-14	4.50733819138547e-13
comp59829_c2_seq2	3.35285923997984	0.22770751863431	0.774957048904745	3.91983200179604	63.9267994732324	8.50931035884173e-14	4.73089641761118e-13
comp45419_c0_seq1	-1.05156257407385	0.0612467086717703	-0.220120810953014	7.24097842874513	63.8898910789193	8.66537306081889e-14	4.81436011178875e-13
comp59050_c0_seq3	5.51070455226734	-0.366502214427819	0.966540086337046	3.39119827321452	63.7763793511033	9.16350127691881e-14	5.08762611991122e-13
comp60094_c1_seq4	-0.878773894148554	-0.367560664991604	-0.213946279826931	10.7602224484778	63.7679575318024	9.20157991974726e-14	5.10527083021706e-13
comp35780_c0_seq1	-1.63969210965537	-0.0203097828308303	-0.494503319421142	7.92831933958148	63.760081540402	9.23733374388725e-14	5.12160241641245e-13
comp56197_c1_seq3	-1.75099296509418	0.482394821917711	-0.460131446411647	4.67784520553311	63.6688286369045	9.6618497713427e-14	5.3533119785717e-13
comp58116_c1_seq7	6.12185338353484	-0.184399510949987	0.596288567628717	3.64610682351477	63.6337943191586	9.8299646358397e-14	5.44273861599157e-13
comp47442_c0_seq1	-1.32913933548269	-0.414631059439094	0.23057392468218	5.42411369598241	63.5267421603102	1.03619957681256e-13	5.73340189054106e-13
comp57833_c3_seq1	-1.23262987698847	-0.277820328177835	0.379025037324987	8.8450200041712	63.4820612539955	1.05924778031052e-13	5.85693213314941e-13
comp54575_c0_seq1	-1.72138876960744	-0.0349560066886252	-0.359695323560977	4.35298914467136	63.4672156221334	1.06701860709928e-13	5.89587786581238e-13
comp59412_c1_seq1	-2.05897718736996	0.136741334663682	-0.503448609046775	4.02618798846827	63.4614360076313	1.07005928676724e-13	5.90865162025565e-13
comp56554_c1_seq1	-1.99368612988557	-0.479082290865404	0.360003199742273	4.39374681671466	63.3459012321462	1.13269279558239e-13	6.25024356772695e-13
comp58413_c1_seq1	-2.1259736654208	6.65584411967637e-05	0.101133930106346	4.3085481462079	63.3400466871078	1.13596244029022e-13	6.26402145645752e-13
comp57323_c0_seq2	1.95387782897564	-0.404332212996878	0.3006325914641	5.28842084858328	63.290828013359	1.16382576000195e-13	6.41330496979999e-13
comp50415_c0_seq1	-4.53774721029758	-0.439856564998559	-1.09297771464614	4.09860557188381	63.2704092482538	1.17558461355617e-13	6.47370168307491e-13
comp56397_c0_seq1	-1.37653339723283	-0.138880721474317	-0.225474240086973	7.15253090312184	63.239989778642	1.19332331485974e-13	6.5669238223035e-13
comp60112_c1_seq2	5.43663544750038	0.629038997320604	0.448615907861406	3.54669954824322	63.1925687551202	1.22151134176565e-13	6.71748367459457e-13
comp58016_c1_seq3	6.3894310219958	-0.317633576250535	-0.233470070999323	3.54564466013905	63.1890588075902	1.22362398835118e-13	6.72453969462687e-13
comp59997_c3_seq1	-1.40439848824532	-0.225004748842888	-0.192189881289676	5.05835011548937	63.1811662184594	1.22838790729876e-13	6.74614659658788e-13
comp58071_c0_seq1	-1.14760953378652	-0.437134279142283	0.0400723271185977	5.97836907445247	63.1571570668769	1.24299395775423e-13	6.82173935108721e-13
comp54503_c0_seq1	-1.67302277527159	-0.416604189191155	0.0801968652516313	5.43871459539551	63.1171238022208	1.26773538217932e-13	6.95281664948955e-13
comp56420_c0_seq2	-2.34507510285908	-0.0499740583410917	0.33793548665078	3.94961957515889	63.0810375142431	1.29045903909488e-13	7.0726578572705e-13
comp59137_c6_seq1	-1.16609539151889	-0.319388465093738	-0.0217071059706472	5.60145549303049	63.0792349968413	1.29160470584975e-13	7.0741538821744e-13
comp59099_c3_seq4	-1.3138924679918	-0.42247573437063	0.294074433246884	8.33157053310366	62.9846798798913	1.35315058815204e-13	7.40623812799489e-13
comp16492_c0_seq1	-0.876100939815962	-0.0342440508337331	-0.204952754984193	10.9102573326767	62.9268111221431	1.39225449392754e-13	7.61512478257534e-13
comp57301_c2_seq1	5.23531405413692	0.0632586920597072	0.849485152489748	3.24675503339457	62.8652000841828	1.43512934870554e-13	7.84434153783351e-13
comp35792_c0_seq1	-1.25402892170523	-0.141889655982074	-0.836254917005522	8.40194429019664	62.8454663559593	1.44913907957487e-13	7.91558044409291e-13
comp50570_c2_seq1	-0.973114722811477	-0.389993361668943	-0.0487571269618129	7.17764441740922	62.8389984908891	1.45376054402446e-13	7.93547674738198e-13
comp43913_c0_seq1	-1.0642221303451	-0.258697944258646	0.0804617448995124	7.13853156870901	62.8337284939283	1.45753698855496e-13	7.95073676260195e-13
comp55119_c0_seq1	-1.0749863028071	-0.344673863526592	0.153117866258764	5.64084988504294	62.7300487248033	1.53385981570786e-13	8.36144429463879e-13
comp59157_c5_seq1	-1.42367912001979	-0.182236390545677	-0.974523097964646	4.97231777112526	62.7018519945667	1.55529887453259e-13	8.4726160463449e-13
comp59755_c0_seq1	-1.82926739133896	-0.0425372497839681	-0.09130130104006	4.51037987334277	62.6988628447709	1.55758912601166e-13	8.47939385859674e-13
comp60440_c0_seq1	-1.17049415211431	-0.0601460082211525	-0.0959525929410821	5.30764649587751	62.6872446423456	1.56652291439146e-13	8.5223051973538e-13
comp54417_c1_seq1	-1.31679494796212	-0.260697078397015	0.144157839384526	5.9742506914327	62.6264544116495	1.61410925543161e-13	8.77529820558593e-13
comp56890_c2_seq1	-1.61163705787673	-0.161815871378889	0.437949780838048	5.71239468453211	62.5835263623349	1.64858096583205e-13	8.95670060927252e-13
comp61099_c1_seq1	-2.2045878007939	-0.689168718352032	0.211810499748081	4.0066353961272	62.5502179150544	1.67583418904496e-13	9.09866841017978e-13
comp58120_c0_seq1	-1.69800859594436	-0.425187975625405	0.346287602165762	4.61217592062803	62.4438623735573	1.76590614610099e-13	9.58128194129495e-13
comp53911_c3_seq2	1.83035931636762	0.361182859928207	-0.877992185903336	5.17518307301025	62.4377104265917	1.77126180003893e-13	9.60391180676627e-13
comp50331_c0_seq3	-1.61705485596773	-0.528475611862651	0.109327438883161	5.31055724515117	62.4159542184367	1.79033249819381e-13	9.70082568874264e-13
comp51108_c0_seq1	-1.82021541984593	-0.312381242774436	0.112243555859932	4.53994358646068	62.3769672801008	1.82502187775816e-13	9.8821825925903e-13
comp56587_c0_seq1	-0.977872767374977	-0.444678010366126	0.075095280907778	8.40485415551973	62.3721254712793	1.82937660396355e-13	9.89915003453175e-13
comp50612_c0_seq2	-2.88012354394111	-0.315388421487949	0.766232934882844	4.16873161621684	62.3369259325886	1.86134885649874e-13	1.00654395135282e-12
comp48744_c0_seq1	-2.02555803005728	-0.584506560324556	0.0811923555628044	3.78888549011555	62.332036879498	1.86583360863758e-13	1.00829648210775e-12
comp58024_c8_seq1	-1.30789054335885	0.148481254714306	-0.201010461152147	6.00089279780181	62.3266769939192	1.87076266908559e-13	1.01028662195921e-12
comp55790_c0_seq1	-1.54699082254945	-0.341149550530432	-0.0220065397131708	5.5059341269568	62.3146372085593	1.88188220630983e-13	1.01561499096854e-12
comp46169_c0_seq1	-2.48311217589309	-0.0914898111071113	-0.699614531400847	4.19443889980671	62.3103512225078	1.88585652117847e-13	1.01708269864755e-12
comp56593_c2_seq4	-0.776820414520543	-0.552914162499637	-0.701708357707591	11.8444632084124	62.2445644495426	1.94792268307734e-13	1.04985779714261e-12
comp59533_c0_seq2	6.70817264664592	-0.524844139186488	-0.269611851681395	3.7027628843532	62.1936864810902	1.99731980893074e-13	1.07576573894967e-12
comp60757_c0_seq2	-4.79165398297295	1.17681163795065	0.195270459716725	3.8187475829695	62.1596040088076	2.03110862050871e-13	1.09304015966821e-12
comp57276_c2_seq2	-1.07781131071489	-0.314430188375734	-0.0017336360375065	5.60589368644157	62.158623371036	2.03208921862817e-13	1.09304015966821e-12
comp57316_c0_seq1	-1.10310734907063	-0.344721640443767	-0.427673112444759	5.21542095606817	62.1215416089319	2.06951879359592e-13	1.11243496955494e-12
comp56519_c1_seq1	-1.62848433731519	-0.335910762911707	0.38087277189965	4.58618157228257	62.115787447316	2.07538836929083e-13	1.1148507701439e-12
comp57023_c2_seq1	-1.94336306222821	-0.0740638717739014	0.19553575238759	4.55421791151436	62.110105538915	2.08120056919168e-13	1.11723257045482e-12
comp60536_c3_seq2	5.86283215827417	0.985988837294327	-0.233014533726205	3.67931898720287	62.0589426067603	2.13427502123714e-13	1.14496580556904e-12
comp51012_c0_seq3	-1.09879953856984	-0.571206475844635	-0.155683587382277	5.79370248497324	62.0090926420311	2.18728833841838e-13	1.17262958142985e-12
comp53939_c0_seq2	-0.613201187332011	-0.896404366273949	-0.427525712907409	7.28157456485048	61.9758384786525	2.22338254756175e-13	1.19119226242799e-12
comp61319_c7_seq4	-1.60452094915183	0.0645507863804477	-0.157346533427902	4.63452305763873	61.9739102874221	2.22549358061078e-13	1.19153573080786e-12
comp35709_c0_seq1	-3.45490439980762	0.361400362067091	0.919817503211039	10.0784977458033	61.9573181345326	2.24374208310533e-13	1.2005130908021e-12
comp61032_c6_seq2	1.69348660113038	-0.0949437480686616	0.244920847644433	6.06955981177222	61.8932903019896	2.31557473942351e-13	1.2381298705651e-12
comp56785_c0_seq1	-1.98680690956465	-0.40182099120864	0.273585490947417	4.21140347914095	61.867288020833	2.3453987868501e-13	1.25325000436433e-12
comp57654_c2_seq2	-2.67171276829107	0.113236500224297	0.514205712854631	4.14824841819895	61.8654311799862	2.3475431717872e-13	1.25356949608084e-12
comp56460_c0_seq2	-2.42196062536714	0.154793046082477	0.145043569723499	7.32312957394944	61.8103726975485	2.41202615930773e-13	1.28715497349233e-12
comp51196_c0_seq1	-1.45016382412579	0.295001457858035	-0.498391790240573	5.08257443364256	61.7049991688001	2.5404142024836e-13	1.35477615298237e-12
comp48427_c0_seq1	-6.13240326978976	-0.364170513490945	1.30320900396248	3.89604207411444	61.6959387030896	2.55176741019967e-13	1.35993600441016e-12
comp50186_c2_seq1	-1.29425187160018	-0.0977550611316621	-0.0295940725508516	5.61840927348869	61.6925166425635	2.55606860139233e-13	1.36133325117518e-12
comp58175_c0_seq1	-1.01785276353457	-0.627377033540192	0.00524541666710642	5.28008423133652	61.6757703169036	2.57722179906469e-13	1.37169795818899e-12
comp58758_c0_seq1	-2.27467212288886	-0.298633997727725	0.602446887845979	4.03386909013537	61.663269492145	2.59312624713422e-13	1.37925730703872e-12
comp55765_c4_seq1	-1.56333577236762	-0.331781560090323	0.522091648597457	5.35171438338738	61.6085706632382	2.66387978161763e-13	1.41596127933066e-12
comp50537_c0_seq1	-1.60334183111021	-0.663403742527887	-0.618224982705482	5.84684002205114	61.5729285167778	2.7110182946102e-13	1.44007302071496e-12
comp57188_c0_seq1	-2.14631014562731	-0.255121395933483	-0.951628997230708	3.84749715113815	61.5661350421019	2.72009715214986e-13	1.44394941161275e-12
comp19476_c0_seq1	-1.17202167445339	-0.463821414512289	-0.100058211206104	5.7892073037679	61.5240956915818	2.77695868930614e-13	1.47316931515154e-12
comp50943_c0_seq1	-1.08739667572879	-0.428882638197296	-0.633166825169344	9.71758141396774	61.5173794591903	2.78615234677677e-13	1.47707985107734e-12
comp56264_c0_seq4	2.56549669840979	-0.309775269490558	0.152800024637671	4.58580512914344	61.4551816304535	2.87275180030132e-13	1.52199516949297e-12
comp50812_c0_seq1	-1.01084610840709	-0.404658367781768	-0.0867710566743934	5.64793418099368	61.4475890574316	2.88350570923323e-13	1.52669479288338e-12
comp47267_c0_seq1	-1.55480189272561	-0.366318288327784	0.0678313634371566	4.72830343586749	61.3846558309953	2.97420565979848e-13	1.57368871268449e-12
comp69413_c0_seq1	-1.56163593299884	-0.587788913321933	0.411298748208619	5.96983435496373	61.3707438149453	2.99463752969993e-13	1.58346587186873e-12
comp35868_c0_seq1	-1.96766221497896	-0.00836102098835845	0.878524737056588	5.40601877820674	61.360476377419	3.00980671311444e-13	1.59044936222332e-12
comp35747_c0_seq2	-1.13988671865042	-0.148630670466058	-0.423710930884533	10.3075409705522	61.2866499942792	3.12116348775458e-13	1.6482183212859e-12
comp15285_c0_seq1	-0.986402024150202	0.0720677760588418	-0.21227968312418	10.8606127803007	61.2800918100077	3.13125253799092e-13	1.6524696011038e-12
comp51256_c1_seq2	-1.28376100786629	-0.351787018398354	-0.0576713018856351	5.81515212857628	61.2669865567218	3.1515112925212e-13	1.66207875973825e-12
comp58658_c0_seq1	-1.85096566759851	-0.0714736716575441	0.170820301979925	4.6493879628156	61.2473465957929	3.18211726016082e-13	1.6771289018767e-12
comp48626_c0_seq1	-1.82064118375099	-0.286439649406178	-0.33631980702152	5.01526558509392	61.2141564687462	3.23451587883417e-13	1.70363779816958e-12
comp61190_c1_seq1	-2.23951595956743	-0.0751548515858474	-0.126019052349673	4.15495327525835	61.1679672339529	3.30887494200299e-13	1.74167144674521e-12
comp60712_c1_seq1	-2.30368589995727	-0.0483176636579932	-0.0523189527286533	3.73116891179347	61.1439234191759	3.34825628431662e-13	1.76125668012138e-12
comp16423_c0_seq1	-1.48766330137695	0.0282978768847471	-0.493543876830902	6.01063001075428	61.1131734448293	3.39930506417815e-13	1.78694986058548e-12
comp35742_c1_seq1	-0.830865772576367	-0.328380586688899	-0.480060420688411	12.5031285003938	61.0622710218706	3.4855247592963e-13	1.83108643544107e-12
comp59861_c2_seq13	6.35675299293151	-0.190991733568284	0.760129758896704	3.89318858691739	61.0298046111953	3.54165527242747e-13	1.85936901802442e-12
comp16776_c0_seq1	-1.00986704058436	-0.386415543715082	0.0992262689825105	6.30342375855274	61.0188719189501	3.56075919572585e-13	1.86818861103908e-12
comp60119_c1_seq1	-3.82923939128049	0.34657362256442	0.448035978575316	3.55132423868601	60.9687381431246	3.6496911551e-13	1.91360908817857e-12
comp55339_c0_seq1	-2.18851899401236	-0.824561724451631	0.0656125265375941	4.61279160131906	60.9655772087457	3.65537213804819e-13	1.91534883975557e-12
comp60202_c2_seq7	-2.47948384019018	-0.205492768841892	0.515166220028172	3.69051020763316	60.9584049821222	3.66829520804925e-13	1.92087861475757e-12
comp16071_c0_seq1	-1.04058017601253	0.00805871996430861	-0.190989435813385	8.04465685138772	60.9469702786348	3.6889930004993e-13	1.93046980387652e-12
comp69631_c0_seq1	-1.24933544830975	-0.25730400708932	0.216440445354902	6.05238259677398	60.9337643950517	3.71304206555506e-13	1.94180122473479e-12
comp51239_c1_seq3	-1.39670152909692	-0.162752324533483	0.377375312109613	5.50596666529769	60.8734255341478	3.82493352839898e-13	1.99902715546113e-12
comp61288_c6_seq1	-1.05555051451465	-0.122011221859995	-0.10025756700774	5.69652358382918	60.7571440328778	4.05015765402482e-13	2.11537229017559e-12
comp47512_c0_seq2	-1.0838978422525	-0.196580285884691	-0.105869615418212	6.50895501730361	60.7198043083599	4.12525543880714e-13	2.15320802234196e-12
comp47834_c0_seq2	-1.9124801832971	-0.564380153240086	-0.496696597872842	4.50518389479013	60.7168911931418	4.13117249983102e-13	2.1549088985605e-12
comp60082_c5_seq9	-1.57763680737786	0.0691770685208521	-0.28683661985915	6.07517378657202	60.7072396971154	4.15083709950247e-13	2.16377398897537e-12
comp60099_c1_seq1	-1.97333809028316	-0.0884969287505908	0.24175924746186	4.50084007845498	60.6967466340366	4.17232252557835e-13	2.17357624629422e-12
comp61117_c3_seq3	-2.36102725098235	0.483538047693979	0.295372661935612	5.79929932914789	60.6800359350964	4.20676877878464e-13	2.19011353377189e-12
comp60318_c1_seq1	-1.10765188334171	-0.604844651734014	-0.618409447493603	8.01247594474335	60.6748456694047	4.21752536699793e-13	2.19430427630842e-12
comp44951_c0_seq1	-0.903560107447093	-0.0422471405327732	-0.242645525737714	7.60147922095883	60.6074126189934	4.35980165191528e-13	2.26687313601188e-12
comp41766_c0_seq1	-1.45090010691827	-0.363403759929419	0.399880793860676	5.18624598094465	60.5639874931488	4.45395306777565e-13	2.31434253637112e-12
comp57556_c3_seq19	6.74117328496608	0.0675436685437637	-1.30620829249708	3.68436367345057	60.5556619380986	4.47223478642443e-13	2.32235331061861e-12
comp53942_c0_seq1	-1.08920012015678	-0.7435489624946	-0.699426235197521	4.56480713844353	60.4927884539925	4.61273953030191e-13	2.39378147456001e-12
comp58730_c0_seq1	-2.33277989532039	-0.118586192724728	0.314439441656247	3.79329296087911	60.4529307587182	4.70408664461492e-13	2.43962420609396e-12
comp35498_c0_seq1	-2.07940244393064	-0.176104827495408	0.42856953025959	4.03116169319723	60.4361957466664	4.74297734827903e-13	2.45822086861572e-12
comp58997_c0_seq6	-1.40587282390043	-0.648976157848599	-0.288838158642778	6.31407436681887	60.4347998759141	4.74623571325224e-13	2.45833780777141e-12
comp36028_c0_seq1	-0.994520414493342	-0.0783097738580591	-0.0656144816634542	8.57934261899111	60.2695926657602	5.14811168244983e-13	2.66478884405737e-12
comp47345_c2_seq1	-1.27361087716369	-0.26378000949336	-0.0125121919992337	5.39612161688331	60.2274659420392	5.25591864878049e-13	2.71885619444893e-12
comp57937_c0_seq1	-1.98844629534889	0.127376210634344	-0.272528497259915	4.23672232270682	60.1122079330654	5.5625486171967e-13	2.87563897264008e-12
comp36679_c1_seq1	-1.10046845170174	-0.283988343976674	-0.0291078437007304	5.64582035410838	60.0839998134714	5.64027717744414e-13	2.91396346719963e-12
comp57153_c0_seq1	-2.00034159835432	0.0231824385617651	0.420834421878314	5.6495454478131	60.0741408786921	5.66769908874329e-13	2.92626552951294e-12
comp57972_c1_seq1	-1.60119797020947	0.119757202328174	-0.0646343942981682	5.41154265207903	60.0603978459947	5.70614680979608e-13	2.94424099555742e-12
comp48389_c0_seq1	-1.06079400481427	-0.210477271895337	-0.207286639412707	6.04771824382036	60.0215362566257	5.81628317181964e-13	2.99915975768257e-12
comp61043_c0_seq3	4.44448993692399	-2.12077503807705	3.03545732277888	3.27153490016736	60.0089695049832	5.85235083709194e-13	3.01583953499474e-12
comp50698_c0_seq1	1.3340884777031	0.455676101398369	0.775251866543461	6.23585234067672	59.9842740641042	5.92388146340171e-13	3.05076131781031e-12
comp61106_c2_seq4	-1.94758601695878	0.276886122127665	-0.241240377822592	3.97176012125597	59.9714062052721	5.961498968211e-13	3.06818480230593e-12
comp55535_c1_seq1	-2.25383632500184	-0.0460422726142196	0.356002578595745	5.61275589126036	59.8854021066461	6.2191253233186e-13	3.19874555017897e-12
comp53930_c0_seq1	-1.00464677438402	-0.587406561414195	0.0150088269710683	5.63006714911273	59.8614388191268	6.29286953705539e-13	3.23462273096836e-12
comp54810_c0_seq7	-1.93191331958338	-0.675953322217932	0.432462745164393	4.23563641477515	59.832694735513	6.38247988222937e-13	3.27860468474976e-12
comp57808_c0_seq1	-5.95636292791904	0.83518295804296	0.995805909527771	4.0793651919113	59.8295430897251	6.39238246949055e-13	3.28161192512289e-12
comp54689_c0_seq3	-1.28732439476184	-0.649404224418698	-0.186712777294538	4.63145937714131	59.8239887558009	6.40987178427822e-13	3.28850763818729e-12
comp62527_c0_seq1	-0.838711655743705	-0.430494042418548	-0.494837562933503	7.52033290020951	59.7936890539474	6.50612400695014e-13	3.33577743202643e-12
comp58324_c0_seq1	-1.35522333599288	-0.0413890145105261	-0.553680321543461	4.48357203875207	59.786019511549	6.53071588115868e-13	3.34626946477068e-12
comp56431_c0_seq1	-0.607752805001418	-0.71967807822453	-0.533816604130888	7.44447822392736	59.7714918462877	6.57755280730507e-13	3.36813916967877e-12
comp59309_c3_seq1	-1.61804760252991	-0.302357482036805	0.190108037292768	4.92931236451668	59.7163204149217	6.75850341651559e-13	3.45861292261839e-12
comp61434_c1_seq1	-1.42758848608134	-0.189609563285837	0.243008221517927	5.73250141305859	59.6457169208127	6.99734372406252e-13	3.57857843705052e-12
comp60598_c9_seq5	-1.18498321914544	-0.344118834249067	-0.249318516511355	4.92906917826802	59.5738337429583	7.24918123274115e-13	3.70503550268599e-12
comp58320_c1_seq1	-2.95924490184307	0.231132976444051	0.0864006221217824	6.80110716790523	59.5159281355929	7.45862186919238e-13	3.80967793772359e-12
comp45441_c0_seq1	-0.893926510798027	0.079104905315796	-0.379315213517774	7.32972761438891	59.5142514507387	7.46477558622865e-13	3.810420081988e-12
comp35704_c0_seq1	-1.77662862968213	0.145222882960834	0.110630300575774	6.18010796659622	59.5013699459541	7.51222244535236e-13	3.83222625185816e-12
comp51036_c0_seq1	-1.28537260157986	-0.393077385569587	0.0238199603522872	5.50853659161229	59.4554793232565	7.68371573988803e-13	3.91724526965613e-12
comp56896_c1_seq2	5.53731968861187	0.921685941278713	-0.54543274560166	3.37651628233603	59.4426395314886	7.73239478258138e-13	3.93958467049683e-12
comp60500_c1_seq1	-1.33980584349191	-0.0891633130841091	-0.148836300874261	5.20648471296633	59.3668473454302	8.02608807593103e-13	4.08665012207895e-12
comp53973_c0_seq1	-1.40949608464054	0.34031305453116	-0.793321983385434	7.76637532751645	59.350640600798	8.09032161840612e-13	4.11677005893283e-12
comp58851_c6_seq1	1.16281840806044	-0.0361500838928073	0.118296077791462	6.02579344327007	59.3138530629228	8.23803791151162e-13	4.18929313514283e-12
comp57874_c1_seq1	-1.72763029264245	-0.455301520270516	0.676874860460089	5.14210529842637	59.3125841165305	8.24318103941872e-13	4.18929313514283e-12
comp51274_c0_seq1	-2.76662803119336	0.0689815581794454	-0.195675064641287	4.19601225143608	59.3027524603246	8.28313833264904e-13	4.20696236368754e-12
comp53024_c0_seq3	-1.32997327398117	-0.0949787762720441	-0.266332257340035	6.09711367925276	59.2483717759536	8.50767161670052e-13	4.31829593769408e-12
comp58201_c0_seq1	-1.28951192797478	0.0561686324049112	-0.539836180258018	5.22131515226412	59.2460939153684	8.5172083166244e-13	4.32043120241285e-12
comp58014_c0_seq1	5.58433611921654	-1.63287348105253	1.08732602650144	3.47267909102339	59.2168535894582	8.64058161547625e-13	4.38027233114762e-12
comp46791_c0_seq1	-0.887715028246547	-0.382826435025796	-0.200603988980047	6.2008069799416	59.2140584577348	8.6524681983082e-13	4.38355670096789e-12
comp57569_c0_seq2	-1.62823640340473	-0.574892017420665	0.436226378483489	4.38814029423412	59.1814676310398	8.79227613181426e-13	4.45160464237891e-12
comp55184_c0_seq1	-1.53289114499623	-0.248677957276583	-0.0877531411679675	4.37500793346693	59.0982746036536	9.15948028105822e-13	4.63462841187628e-12
comp50732_c0_seq1	-1.61130168977492	-0.123524027722966	-0.796597762032824	4.26798811800758	59.0823788544912	9.23136704772904e-13	4.66808866431014e-12
comp52120_c0_seq1	-2.24017352089573	-0.832009945225522	0.626259746427173	3.58028163954553	59.0407065809497	9.42251347926515e-13	4.76177645030694e-12
comp58872_c0_seq1	5.93182932346201	-0.718981318686886	1.71618244221996	3.94453021346501	59.0294029310673	9.47504077552008e-13	4.78533835055238e-12
comp57941_c0_seq1	-1.06053594591885	-0.483459521259623	-0.462783021351561	6.34479601128343	59.0189735397407	9.52376499501527e-13	4.80695137295104e-12
comp54379_c0_seq1	-2.67640370796295	-0.0116377031361515	0.0932866536095496	10.1813300602252	58.9480944629738	9.86159933527704e-13	4.97436989494435e-12
comp54378_c0_seq1	-1.25272235176001	-0.494291495818964	-0.029957318190007	4.81831135351407	58.9252867974142	9.9728355716985e-13	5.02735106618085e-12
comp57303_c0_seq1	-9.20820972745644	0.840882484752234	-0.389695007601655	6.62961772812334	58.8994312385799	1.01004541503859e-12	5.088519660847e-12
comp58339_c3_seq2	1.01214308863151	0.214419192581487	0.525934062987129	6.64962278053094	58.8538236524656	1.03295570027802e-12	5.2007073953128e-12
comp61043_c0_seq1	7.65239955672665	-1.26794410367817	-1.19081361122575	3.84098576735864	58.8465999643472	1.0366317567329e-12	5.21597580389628e-12
comp43649_c0_seq1	-1.38090010231004	-0.470591741264614	-0.461945400741616	10.3132688965	58.8202518252959	1.05015120616946e-12	5.28072312481988e-12
comp61508_c0_seq6	-2.08852682116131	0.305264137214978	-1.213144835703	3.93585344749852	58.8113107171147	1.05477889418354e-12	5.30070534175561e-12
comp58575_c6_seq3	6.01442946349311	-0.598902416605867	0.104714187320563	3.30731882840541	58.7562558891374	1.08372639848911e-12	5.44280432847134e-12
comp58816_c5_seq1	-1.55781254873901	-0.0324462309506979	-0.81171959729737	4.57277040029109	58.7461776804478	1.0891108027845e-12	5.46645954635983e-12
comp35870_c0_seq2	2.29393698051076	1.0011993145685	-0.995691556890532	4.70094682168684	58.6724972755725	1.12929624234214e-12	5.66465058194638e-12
comp54267_c2_seq1	-1.38426318794219	-0.341127771698954	0.129385637448724	4.65796444784723	58.6644760851053	1.13375949636846e-12	5.68352163114576e-12
comp60645_c2_seq6	-2.17575448040117	-0.0377896755190597	0.663543955306995	5.29759647137248	58.6236021432128	1.15677839457978e-12	5.79533106703566e-12
comp49096_c1_seq1	-1.03093694294928	-0.0989707272398272	0.00544249858338065	6.62928751821937	58.6194513316438	1.15914196709253e-12	5.80358541399141e-12
comp61098_c0_seq6	-1.52299912346255	-0.417702596126246	0.402014589404248	5.44314758512913	58.6155072572767	1.16139229029413e-12	5.81126290439766e-12
comp54941_c0_seq1	-1.0300797390464	-0.362800197278992	0.0445040484280677	6.42834170183681	58.6053747987468	1.16719348288606e-12	5.83668745976211e-12
comp60107_c5_seq3	-0.651038781162411	-0.853478756798713	-1.21717734405771	5.4808117285184	58.5919195932002	1.17494185422759e-12	5.8718117573174e-12
comp20145_c0_seq1	-0.961690012106795	-0.0516558766850007	-0.270025371119033	8.67705389994242	58.5833558278726	1.17990017083833e-12	5.89295796969533e-12
comp61344_c1_seq1	-0.883432422725568	-0.62846691259377	0.22156971533926	6.45097562905694	58.5307759486353	1.21080498127612e-12	6.04358693240408e-12
comp57309_c0_seq1	-1.14830378495373	-0.395722896629845	-0.19851958481394	5.32743905417481	58.4915662666342	1.23437663896738e-12	6.15745048336588e-12
comp35768_c0_seq1	-1.11565297581122	-0.0524901577644497	0.0593141109451307	7.06235950337041	58.453753044377	1.25754310066461e-12	6.26915398154202e-12
comp35642_c0_seq1	-1.89544733856477	0.61476477271092	0.0540022737959444	7.06683462282213	58.4265461563023	1.27447987035242e-12	6.34968274682034e-12
comp61023_c0_seq1	-1.80394686816366	0.225575214369077	0.288328806205982	4.87253234988968	58.4252520461861	1.27529113250872e-12	6.3498218182529e-12
comp64275_c0_seq1	-1.19379392948561	-0.326108117054301	-0.0710526770680414	6.63148906437792	58.4055389350731	1.28771304981362e-12	6.4077360231978e-12
comp56892_c4_seq2	-1.41381656495907	-0.0782157444406376	0.0145354141778471	5.85710803526994	58.3844906829285	1.30110980354201e-12	6.47042703528316e-12
comp35637_c0_seq1	-0.771644273493937	-0.366241642826	-0.142751280095794	7.18492690227368	58.3354559491369	1.33286207097159e-12	6.62426728834807e-12
comp35706_c0_seq1	-1.3148886767403	-0.407711429859305	-0.493947428645377	9.61101121626574	58.3296955720545	1.33664265432294e-12	6.63898612496429e-12
comp43392_c0_seq1	-3.58505119820722	-0.275473295058694	0.271748192768363	3.50499078448966	58.3039590871202	1.35366506164457e-12	6.71941762993929e-12
comp55182_c4_seq2	-1.63594134185353	-0.0397968217875966	0.19724418358217	5.68197142546594	58.2551029137015	1.38657738962073e-12	6.87857791937922e-12
comp54100_c0_seq1	-2.5646748120389	-0.226609018012889	0.16795138699789	4.48671323209072	58.2429106642444	1.39491473331081e-12	6.91570570533177e-12
comp56998_c0_seq1	-1.13802509632334	-0.316461445372391	0.113656508805578	5.73891536199253	58.238519479843	1.39792978377436e-12	6.92641737608494e-12
comp58678_c0_seq1	-1.44119789430639	-0.358333029039426	-0.0587733071733281	4.39516291903192	58.1542197569125	1.45709059191243e-12	7.21513520955536e-12
comp35612_c0_seq1	-1.70891219574733	-0.259909791568877	0.199394198146644	4.49998325027165	58.0772786498771	1.51326864354359e-12	7.48873969753621e-12
comp59829_c2_seq14	-1.19941336986699	-0.468319551698122	-0.240529581232563	5.47268441380301	58.0041831479911	1.56864264499523e-12	7.75803372808504e-12
comp57116_c3_seq3	-1.72300439938952	-0.424769861207918	0.363510123311584	4.55725447327736	57.9769228234755	1.5898084297447e-12	7.85791898262837e-12
comp58630_c0_seq1	-8.62727506562076	0.291366166526106	0.263286385140352	6.47108088609719	57.9570611068919	1.6054092193348e-12	7.93019325528818e-12
comp58503_c0_seq1	-1.77388315760493	-0.0956274221721422	-0.196185388660474	4.24975578985482	57.95377685624	1.6080036024106e-12	7.93817125526206e-12
comp51121_c0_seq1	-0.91219043829154	-0.196546329607619	0.0248236802040462	8.04555424253802	57.9376534423867	1.6208011483262e-12	7.99647845911879e-12
comp59391_c0_seq1	-1.68906672662601	-0.63909948411395	-0.351238438818015	4.16958698606772	57.8850984632047	1.66322620469546e-12	8.20079781950206e-12
comp35535_c0_seq1	-2.29868836095099	-0.111232530913753	0.0230826189064585	5.32309861564275	57.8560344278045	1.68716292794228e-12	8.3137645555624e-12
comp58647_c2_seq1	-1.77410976965213	-0.0481732414379609	-0.209811374896884	4.99867871648035	57.8480578788164	1.6937923021881e-12	8.34136111879512e-12
comp44716_c1_seq3	-0.861737861183073	-0.586195905395098	-0.604158182141846	6.25964087544687	57.826869518024	1.71152881919276e-12	8.42091380770822e-12
comp47724_c0_seq1	-1.7442091176233	0.302602687558298	-0.473698401877137	4.97072510680997	57.826281206207	1.7120239273505e-12	8.42091380770822e-12
comp55342_c2_seq1	-1.38228168519673	-0.561568493612278	0.114128535110138	5.28317695482907	57.793247875343	1.74005481995576e-12	8.55359876929134e-12
comp59462_c3_seq3	-5.92265706014089	2.48353244073298	-2.59571499876577	4.28878815133229	57.7614003521291	1.7675136701731e-12	8.68331261237767e-12
comp56678_c2_seq2	-0.841185305298232	-0.433380775113579	0.13724408719955	7.80647392878746	57.7519464733671	1.77574782999331e-12	8.71848086609679e-12
comp58778_c6_seq6	-1.48795759246097	-0.412528542022988	-0.26812962500278	4.19615904681441	57.734529205716	1.79101846868403e-12	8.78813299464454e-12
comp57685_c0_seq2	1.66460628600474	0.322369668563725	0.339397623859281	7.22930694133336	57.6647737199964	1.85350352297686e-12	9.08923143209343e-12
comp60326_c7_seq1	-2.2061440224283	-0.259896510053158	0.0766157078410049	3.70300667438439	57.5831268893843	1.92941338289069e-12	9.45575869511e-12
comp58101_c1_seq1	-2.04826594397632	-0.450665115206898	-0.0343550205458757	4.97601719970328	57.5712935679392	1.94067006250462e-12	9.50517917018881e-12
comp35543_c0_seq1	-1.91462611340568	-0.432404857787259	-0.0643964618639281	4.7162651703107	57.5695639859451	1.94232085010076e-12	9.50751981335552e-12
comp16397_c0_seq1	-1.06355764933224	0.254885545117955	-0.206846677863361	9.2145510197463	57.4238494644787	2.08655756967923e-12	1.02073842243934e-11
comp52449_c0_seq3	-1.28916853410669	-0.0715290692590988	0.116984588094048	5.55886923337224	57.4145964016447	2.09607015946078e-12	1.02477350498125e-11
comp60491_c0_seq2	-1.60466385924851	-0.450004852428666	-0.467547519463362	4.16245407314519	57.4100050281588	2.10080638699574e-12	1.02646995617767e-11
comp51140_c0_seq1	-1.28041136988361	-0.0519238073860489	-0.117762399077636	7.27591530590536	57.3909848426665	2.12054084062698e-12	1.03548819603147e-11
comp57755_c0_seq1	-0.726183896091908	-0.897388290846493	-1.19055107450248	5.56082261797855	57.386780151227	2.12492837631674e-12	1.03700598545596e-11
comp53888_c2_seq1	-1.0114254167731	-0.521212094319258	0.0787558963950095	5.94043774150538	57.3706584820966	2.14183535637482e-12	1.04462800233299e-11
comp35816_c0_seq1	-1.45983160356021	-0.393557656456971	0.431633237612411	5.93007974367409	57.3511128441746	2.16251349519024e-12	1.05407903740301e-11
comp59626_c4_seq17	-1.90618848164639	-1.04993459593421	0.524307177657757	5.7744293468838	57.2478765886418	2.27508722001081e-12	1.10828467580575e-11
comp58472_c2_seq3	-1.39321380436409	-0.447653145208599	-0.454410998382739	7.59658588790355	57.2456136776587	2.27761931619576e-12	1.10885178240738e-11
comp50674_c1_seq2	-1.65051486778266	-0.167995383280436	-0.137409915283375	4.41081083664536	57.2352106511726	2.28929612169079e-12	1.11386760878905e-11
comp57213_c2_seq1	-1.36935640321218	-0.0398905338748657	-0.260485654113085	5.29951228905414	57.1575925415788	2.37832747488754e-12	1.15649205227585e-11
comp35615_c0_seq1	-3.63470554331241	0.767234993977694	-0.0687730815417645	4.45321112515745	57.130310900316	2.41043578802223e-12	1.17140242792015e-11
comp59350_c5_seq8	-2.00744002928447	0.234764964636886	-1.38303759109682	3.58270345313306	57.124357533685	2.41749980640228e-12	1.17413142185122e-11
comp50658_c1_seq1	-1.50012214682066	-0.174426151186642	0.457628310868217	7.02169406741313	57.0879388253226	2.46116539395436e-12	1.19462315469425e-11
comp56048_c1_seq5	-3.22278420753198	2.18704542918401	-2.17993285603895	3.86688617795646	57.0733705524087	2.47885250311218e-12	1.20248823400523e-11
comp35635_c0_seq1	-1.37864141278646	0.0384583985934502	-0.276000780010754	6.82561922084553	57.0652577040902	2.48875719408256e-12	1.20657092196371e-11
comp59589_c0_seq1	-1.61599817507517	-0.205140996406146	0.112324704976741	4.98744173769275	57.0591726808629	2.4962121347223e-12	1.20946177908302e-11
comp61465_c0_seq2	-3.06517646427177	0.0622727971025573	0.834395335059644	3.59027538003595	57.0518671965138	2.50519178476079e-12	1.21308749147377e-11
comp35644_c0_seq1	-1.53983596930115	-0.65383096879967	-0.270410762983519	7.04741979133463	57.0218961102601	2.54237037111569e-12	1.23035547631426e-11
comp50428_c0_seq2	-1.2588129814509	-0.431073386471036	-0.182504405559659	5.97029262006139	56.9904390685597	2.58198550932152e-12	1.24878129705014e-11
comp46647_c0_seq1	-0.929088371019499	-0.220865008406903	-0.284382604831154	5.76511938894351	56.9855052732745	2.58825456280693e-12	1.2510668745446e-11
comp44241_c0_seq1	-2.45645025885338	0.26517535418759	-0.450899416435703	7.0221657649643	56.9252285766381	2.66608364436333e-12	1.28791859482772e-11
comp58823_c0_seq4	-1.69029571245482	-0.229192533183545	-0.406800282450701	6.73409655134088	56.9221535031647	2.67011628643146e-12	1.28909842869645e-11
comp51949_c0_seq1	-2.52416535629949	-0.20870019559031	0.853619923850855	4.86874233663677	56.8461747511994	2.77171397010218e-12	1.3373519905743e-11
comp58492_c1_seq1	-1.66885508899186	-0.751233870456086	0.0369829974030865	3.94270645311187	56.8271571424585	2.7977429203885e-12	1.34910791865968e-11
comp52463_c1_seq1	-1.23319229937249	0.0652731605336916	0.11991520699394	6.93554027910337	56.7897419722977	2.84966741553779e-12	1.37332961179247e-11
comp75867_c0_seq1	-1.90225223307978	0.257474775342252	-0.183399854922009	5.34110638178547	56.7256468034716	2.94086617259003e-12	1.41643857367883e-11
comp57898_c0_seq2	-1.57634909222046	-0.113077267388682	0.391340818348096	5.18171427188053	56.7173664674521	2.95285877778047e-12	1.42137014564658e-11
comp58936_c1_seq1	-1.50491247160327	0.0327189903511332	0.514918055100776	5.28283804552328	56.7100518533259	2.96349335617753e-12	1.42564256054451e-11
comp54330_c3_seq1	-1.4552660578494	0.332440562575612	0.0939698379708692	9.09997614011701	56.6250777767735	3.08987673012728e-12	1.48555995103273e-11
comp58007_c2_seq9	-1.1245991416437	-0.371225633831024	-0.616715672474946	5.77379993518964	56.6146805598002	3.10570602499638e-12	1.49228530163726e-11
comp18406_c0_seq1	-1.27687486056176	-0.0762790700971638	-0.634289292424852	7.29143015056461	56.5703109738573	3.1741726845415e-12	1.52427984483966e-11
comp59912_c0_seq1	-2.63300039417121	-0.283903412333428	0.761329501721592	4.30444856633216	56.5098803856467	3.26985580006479e-12	1.5692984674556e-11
comp57903_c5_seq2	-1.66722538429673	-0.489269243953315	0.220554572584947	4.07404895285471	56.4995286165525	3.28653313804588e-12	1.57636908976331e-11
comp59059_c0_seq1	-1.69415371983719	-0.573924583263401	0.124628274807021	5.61140701722042	56.4584780547153	3.35350930487838e-12	1.60754266264602e-11
comp53557_c2_seq1	-1.23149455743737	0.105272434780001	0.0695359258525112	6.9163371876427	56.3492716182593	3.53840167638252e-12	1.69517044850808e-11
comp51127_c0_seq2	-2.58298829187159	0.208532947220801	0.480622026340522	3.76111479092407	56.3065872040158	3.61340746338537e-12	1.73008156516254e-11
comp61199_c0_seq1	-2.71871324941727	-0.0573609592096619	0.0432990658097946	3.71187204187365	56.3034765955387	3.6189351922783e-12	1.73170535233813e-11
comp58832_c0_seq2	-1.23370846089684	0.239229455558555	-0.219930992836046	5.808343583662	56.2819100653844	3.65749326721589e-12	1.74912332885263e-11
comp54987_c1_seq1	-6.99437482637995	0.257737400454717	-0.0887328723397324	5.78691055268647	56.1422317068444	3.91735538289576e-12	1.87229261401846e-11
comp50749_c0_seq1	-1.41041263926922	0.421215896187038	0.0866403310062973	6.80682833719738	56.1095270308545	3.98081921754951e-12	1.90150386431682e-11
comp58811_c0_seq1	-1.64194210378085	-0.509317973507066	0.0737485990263257	4.41088540933768	56.1082079785807	3.98340030108363e-12	1.90161618613568e-11
comp51002_c1_seq1	-1.54388349407375	-0.235770487633554	0.22530151953856	4.52657179591221	56.0853649712154	4.02836505320766e-12	1.92194980113604e-11
comp56079_c0_seq1	-1.72281650982133	0.495911006352464	-0.0697913040267904	5.21519622046867	55.9699506239347	4.26342459229247e-12	2.03290116147781e-11
comp60000_c1_seq1	4.25868427987	0.298531225744608	-1.41031645711025	3.37785062457158	55.9486718987526	4.30823550402891e-12	2.05306037599402e-11
comp58009_c0_seq1	-0.927775382655424	-0.916308703212038	-0.21438961159407	5.76926763838721	55.9409036021654	4.3247118019742e-12	2.05970116726221e-11
comp53875_c1_seq1	-1.02387118476535	-0.199827066729949	-0.537908063550416	6.93568993506211	55.9294907584907	4.34903234957937e-12	2.07006789346391e-11
comp48980_c0_seq1	-1.38848587611886	0.0229596302286389	0.304981770147796	6.92378282269261	55.8638033344196	4.49169204959209e-12	2.13671688697145e-11
comp51031_c0_seq1	-1.19954382742757	-0.258929616616286	-0.407999915972232	9.77548849705598	55.8267404976132	4.57423903186388e-12	2.17470859778819e-11
comp64016_c0_seq1	-1.05844610367529	0.0496314959894321	-0.186746574044697	7.27579460316369	55.800484885039	4.63363176220856e-12	2.20165410694388e-11
comp61366_c0_seq2	5.42583777738338	1.31536552213291	-0.837471302266586	3.4222717112964	55.7647557057032	4.71569450684911e-12	2.23933331414874e-11
comp60425_c0_seq1	-5.61838231401573	-1.42286524335073	-0.896014211320012	6.33464191670125	55.758667324028	4.72982243049255e-12	2.24472720266819e-11
comp60273_c0_seq10	3.40431010793342	-0.280343979835601	-0.621039067644213	4.24439444395391	55.7342702647158	4.78686077774639e-12	2.2704677275841e-11
comp61361_c0_seq1	-1.74372313925252	-1.17292446098004	0.234807390792311	4.35237750072418	55.7036422846965	4.85944067908962e-12	2.30354538857897e-11
comp58825_c0_seq1	-7.16684688722507	3.76594693672783	-3.08806164335309	3.68084885967461	55.6946507791947	4.88095616259593e-12	2.31239220654603e-11
comp15159_c0_seq1	-1.0932701337493	-0.0551629769487029	0.0535308248642426	9.39713519589795	55.6588562291055	4.96755580592147e-12	2.35204482259343e-11
comp58632_c1_seq2	-0.655995064095879	-0.740364062378147	-0.749931755964092	5.55654973958364	55.6534644766576	4.98073276189722e-12	2.35690716683823e-11
comp59070_c3_seq5	-0.697746690896851	-0.502319559230222	-0.31218686830663	8.27154155369439	55.6429580514253	5.00650995268862e-12	2.36772285160408e-11
comp46393_c0_seq4	-2.25972906270597	-0.0253532855839805	0.499387621476638	3.88513631033239	55.5871572487252	5.14566660070019e-12	2.43211507086156e-11
comp55689_c0_seq3	-1.27971652404729	-0.806741519975701	0.270091166797862	4.74991526966601	55.5516397959521	5.23624687982487e-12	2.47348585127392e-11
comp60602_c1_seq1	-1.87493183459382	-0.514781613074294	-0.0468468815709388	3.91888137064416	55.5484792984037	5.24438390512233e-12	2.47588677547592e-11
comp19371_c0_seq1	-4.69083419391266	-1.049324722643	-1.45850042194619	6.8867449868188	55.5044575247233	5.35904515239497e-12	2.52854598401127e-11
comp37180_c0_seq1	-3.38142446383879	-0.584273052636889	-0.0776384333598251	4.41982684090316	55.4931574153592	5.38887988683955e-12	2.54114370929153e-11
comp60688_c0_seq8	-2.3589671759447	0.134653000652432	0.0108577128053427	3.68710513252719	55.4320993299629	5.55298155502932e-12	2.61700398168998e-11
comp59017_c2_seq2	-1.2621524722617	0.144800272133417	-0.165561738696326	6.17412655693878	55.4045869503772	5.62854782367031e-12	2.65107545953931e-11
comp35470_c0_seq1	-1.91158794695517	-0.127120630660723	0.325060275390954	5.11758332287496	55.3823433130564	5.69039347596974e-12	2.67864863624917e-11
comp59331_c2_seq3	-2.20421406966631	0.247829158019472	-0.00203241403797236	4.12807240907215	55.3289182344894	5.84172384289753e-12	2.74828865180078e-11
comp60801_c0_seq1	-1.1224943013047	0.0480546218049339	0.00324913067278912	6.12808056900177	55.3036599853117	5.91466338775924e-12	2.78098964159956e-11
comp60249_c2_seq8	-2.55429920042963	-0.404759722896966	0.491253184964613	3.57113468290917	55.2260238437451	6.14460459276972e-12	2.88742984515892e-11
comp44992_c0_seq1	-1.29409869366939	-0.216638511769035	0.0989340036462594	6.77031154355816	55.2081606308326	6.19876333438453e-12	2.91119209666982e-11
comp35524_c0_seq1	-1.63034590194899	-0.157790582667421	0.171298205147199	4.6780743629875	55.1896210184011	6.25547736904785e-12	2.93612620460347e-11
comp57847_c0_seq1	-1.15456892320241	-0.100363420083127	0.143749236676691	6.5914885509499	55.1588245525676	6.35083444871715e-12	2.97915879868642e-11
comp47555_c0_seq1	-1.58099195885371	-0.0154634866411762	0.311987584867497	5.21848820119383	55.1207681906857	6.47067990585899e-12	3.03362240120838e-11
comp53935_c0_seq1	-0.957707630190116	-0.0635551836886773	-0.444578153493222	8.58343970004303	55.1091636538666	6.50767213052097e-12	3.04920175086722e-11
comp50987_c0_seq1	1.78484860796477	0.360152506035055	0.224549337305807	6.31485876010201	55.107944713024	6.51157003970222e-12	3.04926555412052e-11
comp60985_c2_seq15	2.49335526062638	-0.472205390736026	0.475226381699037	4.11784877325743	55.0790185593913	6.60475739328671e-12	3.09111798094585e-11
comp47405_c0_seq1	-8.05429951333695	1.28669528256874	-0.522200723372653	5.51193675818952	55.0404374471907	6.73112632186327e-12	3.14844258309427e-11
comp67336_c0_seq1	-1.10419941724616	-0.485296535010776	0.314573711386725	5.62276337434023	55.0034349874114	6.85459389762841e-12	3.2043447597564e-11
comp59531_c2_seq3	4.03588037076258	-2.03171267000892	0.537434775530713	4.43262322668027	54.9449198633938	7.05447951006717e-12	3.2958853549628e-11
comp56750_c0_seq1	-1.27663568213292	0.0930516059677825	0.11355865942093	6.52442025624	54.9027432415766	7.20215606016523e-12	3.36294222486748e-11
comp63309_c0_seq1	-1.28292658510572	-0.452094896189867	0.0855072660645693	7.29968997406339	54.8872418845029	7.25720526136185e-12	3.38669578863553e-11
comp58384_c1_seq1	-0.829692996278895	-0.401371814840772	-0.773710231251502	7.36914474602348	54.8332151762849	7.45237515923556e-12	3.47577405297834e-11
comp15436_c0_seq1	-1.03454694258566	0.221351636045563	-0.273066122380194	6.85068625123993	54.8292155044785	7.46703068148491e-12	3.48060671099003e-11
comp60985_c2_seq3	1.90883156815561	0.768413699814921	-0.148908467978854	4.09679904222723	54.8141684370718	7.52242433123638e-12	3.50441216258633e-11
comp59212_c9_seq3	-1.39045110590035	-0.289456143882225	0.075616812359202	4.9154894950166	54.7672289032518	7.69787814449686e-12	3.58408961742054e-11
comp57074_c0_seq1	-1.72922270183059	0.0971598117341784	0.309156330135727	5.61928795831087	54.6792203430271	8.03793953519665e-12	3.74027197889231e-11
comp58706_c1_seq1	-1.26144746140404	-0.0693925302780214	-0.614256846745418	9.20470639460441	54.6275244122834	8.2446476519124e-12	3.83425782366047e-11
comp51344_c1_seq1	-1.40976309732449	-0.12665090938579	0.0932646428464068	5.48239903518934	54.5879413619029	8.40650584704354e-12	3.90728993097104e-11
comp15647_c0_seq1	-1.46971956288796	-0.241190756037371	0.0929340792890618	5.93256013311912	54.5705106216536	8.47878491929626e-12	3.93862639288341e-11
comp60504_c7_seq1	-1.32494515101189	-0.337221699330485	0.0291125384895994	5.34080452922871	54.5673455412858	8.49197584846798e-12	3.94249462930592e-11
comp58149_c1_seq1	-1.20027511467067	-0.493400754348243	0.085496322587777	4.79689076843134	54.5656826332062	8.49891447390761e-12	3.94345739699457e-11
comp61189_c8_seq1	-1.19172644577428	-0.014260455894656	-0.961385604177419	7.63310047597102	54.5627484401205	8.51117146561048e-12	3.9468853489839e-11
comp51952_c1_seq1	-1.29014594898656	-0.0155916042611938	-0.0855515856810957	6.05799608810994	54.5417748406255	8.59930034140519e-12	3.98547333147115e-11
comp51300_c3_seq1	-1.270901247435	0.0605718259729209	-0.118040445833364	5.9035196243305	54.5155955772879	8.71058349911446e-12	4.03474227678982e-11
comp27560_c0_seq1	-0.97779376276995	-0.220457544929436	0.157651076807744	6.86486710257748	54.4026595626082	9.20738640536437e-12	4.26242571112984e-11
comp55695_c0_seq2	2.16349265439921	1.54292726925225	0.878319999522726	3.98464918143552	54.3249918918504	9.56538132551512e-12	4.42562677081196e-11
comp61769_c0_seq1	-1.30577524539648	-0.325323950393229	-0.0203516316823508	9.62950324474652	54.2629822183899	9.86116393556754e-12	4.55987420774161e-11
comp58860_c1_seq1	-1.13915514633548	-0.284875835513372	0.0420740540728392	5.86855665828158	54.2479185550493	9.9343860024208e-12	4.59111362232742e-11
comp57848_c2_seq1	-1.04096822068221	-0.661519767206335	0.198914538089353	4.95436897316239	54.2099935122763	1.01211485757144e-11	4.67475956437272e-11
comp57280_c0_seq1	-1.62147953866782	0.18109287316943	0.0292234121757773	6.63318455350554	54.1783532411444	1.02796436231686e-11	4.74526145839434e-11
comp51077_c2_seq2	-1.3209360347192	-0.14104761054837	-0.0506102194377828	5.25123229104589	54.1667222864106	1.03385277853612e-11	4.76972716153319e-11
comp54849_c0_seq1	-2.05025750929257	-0.275630346280263	0.595174618241543	4.42163151225133	54.0820974810321	1.07772294174502e-11	4.96929588497447e-11
comp59937_c4_seq1	-2.0000058610743	-0.20382506394598	0.280552630427311	4.65269871042853	54.0742432300613	1.08188780373837e-11	4.98566375048508e-11
comp59276_c0_seq1	-1.82706287886095	-0.577259370143392	-0.174986612064084	3.49107302230446	54.0155963160025	1.11349910919673e-11	5.12842260178904e-11
comp55989_c0_seq4	-1.11087041559116	-0.354385322406518	0.0303321527096072	5.78972786012896	54.005440270085	1.11906634111577e-11	5.15113671838979e-11
comp60285_c7_seq1	-1.06872869277398	-0.181283035498396	-0.512972546114866	5.67392632248674	53.9963094587113	1.12409531305289e-11	5.17134881248964e-11
comp61490_c1_seq17	-1.03823184407841	-0.216466543334162	-0.244413150646056	6.18658446662733	53.9420670884968	1.15443940529184e-11	5.30793296613482e-11
comp59445_c0_seq3	6.22882905653016	0.405256689128534	-0.0554661476384466	3.73551495151729	53.8930675964504	1.18255363935525e-11	5.43411553322768e-11
comp54945_c0_seq2	-2.40024646748918	-0.490890724500151	0.738690524507665	4.02875664178499	53.888927100966	1.18496043479501e-11	5.44209024614638e-11
comp46535_c0_seq1	-1.92154050266238	-0.380981398557037	0.547286051900084	4.09751570807157	53.8629369462559	1.20018024642595e-11	5.50870804752359e-11
comp56167_c0_seq6	5.66491733691156	0.470930918160143	-0.816396326398056	3.2029450534034	53.8618432849261	1.20082495928623e-11	5.50870804752359e-11
comp57105_c0_seq1	-1.32604943487927	0.1516132797796	-0.50487230957394	9.65249444104431	53.8459996260889	1.2102037068965e-11	5.54859233489992e-11
comp60114_c3_seq5	3.12815025962413	2.24186279985554	1.90681340413666	3.55409507893998	53.8178712263252	1.2270351859479e-11	5.62258180740175e-11
comp18918_c0_seq1	-1.54515663097281	0.0453211111889282	-0.408683741109542	5.94593114862795	53.793373328136	1.24188472279896e-11	5.6874110525471e-11
comp57597_c0_seq1	5.92804623010618	2.16823916609443	-2.63113536459576	3.79780300506929	53.746803667758	1.27061015633119e-11	5.81567810684394e-11
comp47477_c0_seq2	5.81486555898894	-0.260221917556858	-0.168195226553423	3.18432774567651	53.7057222691813	1.29650099870146e-11	5.93083357532395e-11
comp50661_c0_seq2	-5.35239866896217	-0.675857073732711	-0.744271654269412	3.94373436248449	53.7037488278874	1.29775791232949e-11	5.93323499004108e-11
comp56107_c0_seq2	-2.84395029700746	0.0295825793714666	0.903166442028461	3.73165976171823	53.699691063781	1.30034618907737e-11	5.94171714129716e-11
comp75374_c0_seq1	-1.33103181069859	-0.521661750086618	0.47542765015993	5.47022572322559	53.6889208883469	1.30724107472112e-11	5.96985698686729e-11
comp50661_c0_seq1	-1.05185822480912	0.308731234460745	-0.278001118526532	11.2605700088239	53.6747503370166	1.31636851235219e-11	6.00815493306691e-11
comp45877_c0_seq1	-0.9894814896166	-0.379241498727298	-0.00275055427593218	7.52107855348084	53.6731982580671	1.31737208850352e-11	6.00935180045555e-11
comp35928_c0_seq1	-2.02952058758943	0.356078316335896	-0.331404461272041	6.08069464798054	53.663262981005	1.32381438800314e-11	6.0345156398554e-11
comp56219_c0_seq1	-1.37570596407952	-0.708079090998653	0.282839290511829	4.66707986666166	53.6623969816255	1.32437741466849e-11	6.0345156398554e-11
comp54106_c0_seq1	5.96677084174036	-0.079322214945683	-0.620751401884266	3.24665697237797	53.5900666546757	1.37225735815606e-11	6.2491674973107e-11
comp59061_c2_seq1	-1.19762346376442	-0.296217216695091	0.0149712878182813	4.9020452218603	53.5838411377607	1.37645839023459e-11	6.26477917531814e-11
comp57786_c3_seq2	-0.971424314807817	-0.327073994957747	-0.528501056023934	5.44563923779399	53.5320867194907	1.41188397998322e-11	6.42240827258362e-11
comp58159_c4_seq2	-1.43731757786008	-0.162314155009264	0.244539174427257	4.71131804073271	53.5163238514083	1.42285350948476e-11	6.46867669539172e-11
comp58192_c1_seq1	-1.16761645649466	-0.289577343475705	0.000297464726260283	5.05947837353227	53.473352166445	1.45319241762124e-11	6.60290231907946e-11
comp18803_c0_seq1	-1.41823687576323	-0.451413918408315	-0.593681920104356	4.31118118436938	53.4673464684527	1.45748374251138e-11	6.61869087775754e-11
comp54086_c0_seq1	-1.58695153539411	-0.379843845283497	0.16626289452589	4.44069862824298	53.4573698416617	1.46464047382534e-11	6.64746678657795e-11
comp59076_c1_seq2	-1.37907101816825	-0.498452614530366	0.075036746170188	4.6737577911237	53.435621850351	1.48036334232866e-11	6.71506729318192e-11
comp58595_c1_seq1	-2.07431737416804	0.13905344046996	-0.428743444831227	4.18210788387846	53.4266848692916	1.48687319249126e-11	6.74082443978421e-11
comp37038_c0_seq1	-1.11760678314805	0.336187328323279	-0.419452574223171	6.01712532095811	53.3956185320526	1.50972581589484e-11	6.84060227146093e-11
comp53919_c0_seq5	2.92373891155165	0.668560627128193	0.465726108389122	4.07605460974891	53.3755091389654	1.52470522951832e-11	6.90461485501424e-11
comp57766_c0_seq1	-1.39482681686659	-0.831616460549992	0.05238839801079	4.32190991278109	53.3301697552871	1.55902556399177e-11	7.05609225109842e-11
comp57701_c1_seq1	-1.31420457848245	-0.336615159245993	0.13375429144937	5.26876628679471	53.3046066516793	1.57871517701782e-11	7.14121943354153e-11
comp57014_c0_seq1	-1.83116488067588	-0.330922502509131	0.604277655387821	4.92328931668959	53.2864696596035	1.5928354509234e-11	7.20107315403516e-11
comp55725_c1_seq1	-1.55567435077977	-0.968599806066246	-0.308052525072787	3.66038792008976	53.2499099317773	1.62168322856675e-11	7.32740482205244e-11
comp35497_c0_seq1	-1.48941147971572	0.706396982222941	-0.634163370313115	5.21305237045352	53.2417064889177	1.62822761420286e-11	7.3528763458097e-11
comp61234_c0_seq1	-1.89537450721153	-0.628036370836812	0.363499303793074	4.37052042769393	53.2261700817175	1.64069436236405e-11	7.4050492769059e-11
comp36170_c0_seq1	-0.967068818465214	-0.0631426817183207	-0.143031769832987	9.18866005688653	53.2135828576677	1.65086453464601e-11	7.44680462873710e-11
comp56439_c0_seq1	-0.214025396011065	-0.654212002411781	-1.77599240704381	7.74270854101967	53.2030260678052	1.65944272398544e-11	7.48133632960288e-11
comp50285_c2_seq2	2.14524384842898	0.633931803428526	-0.0738247508145249	4.88395390586042	53.1369849999799	1.71412624664658e-11	7.72357273780832e-11
comp56163_c0_seq3	-1.76302938702137	-0.491820491299693	0.558428905366589	4.29123766005482	53.1010708165593	1.74461617350136e-11	7.85658816800114e-11
comp35486_c0_seq1	-1.51332665111453	-0.34684848974434	-0.0931596354841085	4.68218590047042	53.0944955251506	1.75025678693781e-11	7.87761327868843e-11
comp18570_c0_seq1	-4.06652488678661	0.690803361996766	1.39178163259949	4.21515873407921	53.0629075315708	1.77760966340108e-11	7.99628409074872e-11
comp60314_c0_seq1	-1.61709834787957	-0.57530785444957	0.125875693732664	4.35446087600562	53.0565334458293	1.78318073465208e-11	8.01689574880188e-11
comp61135_c6_seq6	-1.94865355544847	-0.490875592585298	0.247323545452134	4.38059678735158	53.0303870618024	1.80621633607047e-11	8.11222179557425e-11
comp46749_c0_seq1	5.69240515047584	-2.0789757893721	1.77811266429026	3.79895910631013	53.0301963612859	1.80638543560468e-11	8.11222179557425e-11
comp59543_c0_seq2	-1.26193054302482	-0.232384312445667	-0.116330601085034	4.92542638399196	53.0234716871879	1.81235851996743e-11	8.13453940357476e-11
comp43479_c0_seq1	-1.05636705609232	-0.651739197656602	-0.361467086864432	6.4855899468375	52.9687114972901	1.86173895489301e-11	8.35155283251950e-11
comp15977_c0_seq1	-0.922233534633254	-0.613004570156908	0.115630104967509	6.27531454036746	52.9539672954973	1.87526288852525e-11	8.40756691061153e-11
comp57605_c0_seq1	-1.56546246051513	-0.396713443096044	0.03297493328918	4.17277109284098	52.9175805700852	1.90905973483262e-11	8.55436053651364e-11
comp50819_c1_seq1	-1.70720278875621	-0.137735392223397	-0.503959442092172	4.26540123321013	52.9015244442626	1.92416594935088e-11	8.61728684278358e-11
comp60630_c1_seq1	-1.56129259649464	-0.105869054781713	0.362954986314762	6.09609013116416	52.8943352144781	1.93096851088843e-11	8.64297666994014e-11
comp61153_c3_seq3	-1.53658724975484	-0.69977378719702	-0.0972307618059824	3.81989441033645	52.8786877019016	1.94585762485294e-11	8.70481341449112e-11
comp60468_c1_seq6	-1.26783133745321	-1.55760055991895	-0.167202195621576	4.48348281265719	52.8613891297168	1.96245133378842e-11	8.77420326072198e-11
comp17168_c0_seq1	-1.109736680144	-0.0164613539807325	-0.0585274804768606	6.1424781160041	52.8230141025603	1.99976924562086e-11	8.93612431367293e-11
comp59760_c0_seq8	-2.41949100131492	-0.0229726989354409	0.397509563602348	4.21418813275893	52.7989082766696	2.02357281753281e-11	9.03751033549364e-11
comp54397_c0_seq1	-0.738083634083939	-0.445930874599507	-0.357853464059665	9.73547361389688	52.7508492905781	2.07187747665855e-11	9.24814913314657e-11
comp58645_c2_seq2	-1.49946412729363	-0.245412893714609	-0.776983080980318	4.55696766198422	52.7471126347245	2.07568116202446e-11	9.26002834307666e-11
comp58754_c3_seq1	-2.66378623060365	-1.44405329006642	0.149626988043174	5.47296854471362	52.7391654328065	2.08379414294231e-11	9.29110853833353e-11
comp54245_c0_seq1	-1.3344505611324	-0.52614508194241	0.700846772466801	4.96375114564194	52.7019394807071	2.12222051450638e-11	9.45456302724052e-11
comp54447_c0_seq1	-1.33316132969698	-0.321159234936448	-0.124222130454867	4.74629456001419	52.7013965392085	2.12278617191929e-11	9.45456302724052e-11
comp55564_c3_seq3	-1.0291263670167	-0.556804963615963	-0.12500615440076	5.36646795596629	52.6879451734088	2.13684853137371e-11	9.51196825662566e-11
comp57221_c3_seq3	-0.907654017776121	-0.452342448094795	-0.116698292242664	5.5681197029839	52.547146308352	2.28974796222679e-11	1.01869906596105e-10
comp56356_c0_seq1	-1.31772133395924	0.0487571295340418	-0.550961563806545	5.18293282460937	52.5283884754784	2.31092663939255e-11	1.02755739653955e-10
comp61387_c0_seq7	4.30811384632027	-1.54407887092882	-0.689441688111714	3.5954481315927	52.520461718167	2.31993514104304e-11	1.03099749195696e-10
comp43856_c0_seq3	-1.45333246042364	0.513593529978056	-0.366298819387929	5.18428856848792	52.4322386896026	2.42259792395989e-11	1.07603171351336e-10
comp58861_c0_seq1	-2.43762627254615	-0.407996293204922	1.22390419478654	3.94770555114075	52.4220512969515	2.43474136533387e-11	1.08083316031744e-10
comp59819_c0_seq1	-1.76700832004836	-0.321523226593676	0.632539591620869	4.28667206638702	52.4104025605553	2.44870129701556e-11	1.08643528810116e-10
comp50768_c0_seq1	-0.914817908395153	-0.865653065980459	-1.57193495973407	5.81910937405203	52.3834325267348	2.48133012775434e-11	1.10030973827006e-10
comp50722_c1_seq1	-0.820845408841271	-0.405568345896981	-0.162704214472078	5.83811518763643	52.3642313593539	2.50482447447159e-11	1.110120677423e-10
comp56892_c4_seq1	-1.06850714614228	-0.357093643758459	0.0966087767426863	7.23931551982888	52.3373053787151	2.53814573064833e-11	1.124273731838e-10
comp47952_c0_seq1	-1.29364861755307	-0.252477958157864	-0.156651442050549	4.90136344394437	52.3301719794027	2.54704738528412e-11	1.12760055189039e-10
comp13924_c0_seq1	-0.947402337626708	-0.0718796181260572	-0.905405435358928	5.02601529418453	52.2962350574758	2.58982586761216e-11	1.1459131267939e-10
comp62405_c0_seq1	-1.02431286945519	-0.0296756912848575	-0.283420459361613	8.29329764959199	52.2737922196668	2.61850937038415e-11	1.15797255626481e-10
comp19240_c0_seq1	-1.0019516257642	-0.221050130886258	0.0728551053250247	6.44634168334122	52.269586911786	2.62391925546427e-11	1.15973225107925e-10
comp56832_c0_seq2	-1.31162581395183	-0.570434216296505	0.14971146251362	4.65903084574286	52.1939411148607	2.72316311732514e-11	1.20294061193665e-10
comp35602_c0_seq1	-1.55447779144869	-0.776548055986576	-0.332106541221958	4.35495051837422	52.1221376691985	2.82083376186339e-11	1.24540732427368e-10
comp57367_c0_seq1	-1.07927413728276	-0.440302418986471	0.125870690560895	6.74354810475469	52.1132604393025	2.83314965574202e-11	1.25016391450435e-10
comp61076_c0_seq4	-1.27649383888962	-0.898959434009765	-0.0617031805830229	4.39696102132059	52.0904685986767	2.86501673261801e-11	1.26353784736679e-10
comp60491_c0_seq1	-1.92158535919708	-0.541783192651447	-0.407854985371404	3.79119124326668	52.0771182845675	2.88384895546478e-11	1.27115169293081e-10
comp58128_c0_seq1	-2.5971415369427	-0.206275729979309	0.593212362928378	3.76721446290495	51.9966634590312	2.99998812046702e-11	1.32162520133183e-10
comp46596_c0_seq1	5.5048128854755	-0.169705552629334	1.05797251391189	3.53498213667755	51.9915171420816	3.00757407871967e-11	1.32424744606744e-10
comp14301_c0_seq1	-1.53862043317261	-0.409171067945261	0.267576746425329	4.93034200456285	51.9655910231348	3.04608314487933e-11	1.34047502564559e-10
comp58645_c2_seq1	-2.1675280892307	-0.12443772688901	-0.0880566383447739	4.78464791267128	51.9613210824244	3.05247254214636e-11	1.34255791788597e-10
comp51274_c0_seq2	-6.53922289004605	1.93374278299916	0.883308815719227	3.83592069990661	51.9586977035816	3.05640471896325e-11	1.34355838676334e-10
comp61250_c1_seq1	-1.8984037954173	-0.613551204756933	0.295784556282655	3.76062516615476	51.9418937966395	3.08171239024312e-11	1.3539490859247e-10
comp54588_c0_seq1	-1.13355004011776	-0.0529734854706496	-0.595557250942658	6.25820692284074	51.936047214466	3.09056670176883e-11	1.35710366655136e-10
comp50658_c1_seq2	-1.18018220802546	-0.171363636710045	0.418182474878165	8.36556063238144	51.9105099206897	3.12954044731289e-11	1.37347346323326e-10
comp60717_c7_seq1	-1.30988534466001	0.0432724607918333	0.483182651927121	6.15575751638422	51.8961943914448	3.15160252209159e-11	1.38240746991745e-10
comp59445_c0_seq4	6.25070420050349	1.40185868542762	-1.36101818955445	3.89155661992442	51.8581098870333	3.21105531873767e-11	1.40772387310371e-10
comp54570_c2_seq2	-1.48725226693416	-0.371994989004737	0.433313131946914	5.14773138837488	51.8506639813163	3.22280926058202e-11	1.41211307385286e-10
comp54990_c0_seq1	-1.32874082512579	0.0416425913021872	-0.00695560883798935	5.62696219050213	51.8345716335572	3.24835936279907e-11	1.42253922176387e-10
comp61469_c7_seq1	1.16167703546131	-0.0877243100235556	-0.177075175265181	7.29841119557986	51.8324331161514	3.25176992616665e-11	1.42326387805113e-10
comp15692_c0_seq1	-0.851867903439823	-0.391845921054697	0.0144756808234898	7.90629598120856	51.8213623287856	3.26948320125576e-11	1.4302445131883e-10
comp59100_c0_seq5	-1.24167604558318	-0.0288283623160599	0.00473268065597373	5.41845525434667	51.8155146972077	3.27887830163591e-11	1.43358077200974e-10
comp58692_c3_seq5	-1.53215732048498	-1.12479428374025	0.931146929591266	5.29733667926074	51.8045870590256	3.29650757043113e-11	1.44051161002236e-10
comp59850_c2_seq1	-1.15066870755692	0.142635489295101	-0.49089218364518	5.06424949896705	51.7530447318704	3.38094493783177e-11	1.4766131285595e-10
comp49766_c0_seq1	-2.26741977588756	-0.503859601377787	-0.157551791316299	3.8063263158537	51.7041221580467	3.4630889454705e-11	1.51167468992912e-10
comp50341_c0_seq1	-1.50784433268377	-0.39598979077248	0.148122185078593	4.67208045742513	51.7026757436936	3.46554768155405e-11	1.51193377323343e-10
comp35645_c0_seq1	-1.38916361951888	-0.445253390288386	-0.075771827065809	7.12721805654185	51.6761245984275	3.51099272279338e-11	1.5309363642261e-10
comp46599_c0_seq1	-0.944522276404387	-0.125978077852935	-0.0279833314366071	6.7337488776372	51.6714971323831	3.51897383076805e-11	1.53359149850569e-10
comp58608_c4_seq1	-2.1570161700749	0.0236002707182429	0.59191174418395	3.96829046112229	51.6678255662693	3.52531917053899e-11	1.53553128406174e-10
comp50608_c0_seq1	-0.9257975574834	-0.237326067459704	-0.184082200514485	8.06088142327992	51.637326228009	3.57847319773189e-11	1.55784660262163e-10
comp59394_c0_seq1	-4.33263676224688	-0.434190768132436	0.478936384879445	3.64951804523569	51.6059503053598	3.63399076397037e-11	1.58080372032203e-10
comp60855_c3_seq3	-1.73734782477923	0.0376160109283926	0.00312392193058079	4.73083965775488	51.6053241078838	3.63510749405412e-11	1.58080372032203e-10
comp56288_c6_seq6	-1.3978796750478	-0.316602413910529	0.249889736203516	6.0696187196362	51.5993502122937	3.6457783042201e-11	1.58459404471893e-10
comp52201_c3_seq2	-1.26835998469446	-0.304776323719051	0.188284240377792	4.97240169884907	51.5825110465114	3.67602586149207e-11	1.59688454626231e-10
comp35865_c0_seq1	-1.11750080930836	-0.413364344067905	0.226487412392033	5.3742854331142	51.5669541510028	3.70419293053585e-11	1.60825859105108e-10
comp56964_c1_seq1	-0.938568174271985	-0.25346688199795	-0.24921270859482	9.92647534187915	51.5373874490791	3.75832175222e-11	1.63088630211431e-10
comp56858_c1_seq1	-1.39189956371036	0.089391279087574	0.246915971803759	6.21342456489146	51.5350236013687	3.76268330331782e-11	1.63190534278728e-10
comp55867_c0_seq1	-1.52188208412146	-0.244291482068128	0.511542157551433	5.1092080866785	51.527549733767	3.77650669072084e-11	1.63702477192423e-10
comp50919_c0_seq1	-3.81255607419119	-0.0555223684654303	0.935763949441772	4.12510672226039	51.5222555131553	3.786329379113e-11	1.64040544880225e-10
comp59134_c2_seq1	-1.47353906953726	-0.0868398177738895	0.341831561637743	4.93841616479199	51.5155275959248	3.79884893720888e-11	1.64495029300295e-10
comp49933_c0_seq1	-1.08429603891497	-0.329018841790884	0.277922851878323	5.63339033842308	51.5085708803755	3.81183775330895e-11	1.64969337043899e-10
comp53178_c0_seq2	-1.37306342613177	-0.428881827984615	-0.207402436704539	6.76262501350041	51.506604423938	3.81551734365732e-11	1.65040467383598e-10
comp60143_c1_seq5	-1.56341018093501	-0.427898589623219	-0.552417244035201	4.86799842915374	51.5005927488298	3.82678828474629e-11	1.65439711126152e-10
comp56179_c1_seq1	-1.28425749923104	0.165849106726992	0.067340170454976	6.59968873344982	51.4875679234324	3.85132203252139e-11	1.66411601255962e-10
comp15295_c0_seq1	-0.896279223874296	-0.190034163187341	-0.391758985304644	9.51227853758163	51.4633057174877	3.89744251556216e-11	1.6827182532887e-10
comp59301_c2_seq4	5.69242940429686	0.0485998180667761	-3.65570104967597	5.30815821973955	51.4627393843572	3.89852563493237e-11	1.6827182532887e-10
comp59278_c11_seq11	-4.59007659231239	0.540948069234934	1.7523401820617	3.65596806181267	51.4209034630202	3.97937480900667e-11	1.71670102191634e-10
comp60146_c12_seq3	-1.49484411205241	-0.345260029771434	-1.93806287634041	6.31161666453384	51.4178126016266	3.98541403434146e-11	1.71839181714744e-10
comp60654_c3_seq1	-2.0937207386003	0.121443257415934	0.00602167088489703	5.97871662818889	51.4125596638331	3.99569875115465e-11	1.72191037091226e-10
comp50428_c0_seq1	-1.10035142159777	-0.377692232629745	-0.569472844379875	10.628980243152	51.3904727489681	4.03923367439805e-11	1.73974644870726e-10
comp15474_c0_seq1	-0.843866975426144	-0.40771375486862	-0.820057125570637	7.50113370041841	51.3644855063527	4.09106373993658e-11	1.76113450217344e-10
comp61299_c5_seq6	4.21650666999617	-3.06194476218845	0.664935723041712	3.50229267490784	51.3373006025746	4.14599383251822e-11	1.78356987860857e-10
comp52084_c1_seq1	-1.47093542779139	0.265995109799097	-0.159809598286343	7.2527909464059	51.3365204358456	4.14758107719856e-11	1.78356987860857e-10
comp61367_c1_seq2	5.34431937130441	-0.174895226458839	1.0381605275932	3.94490763448982	51.3245972155902	4.17191448984689e-11	1.79308265401373e-10
comp56865_c1_seq1	-1.92878652452805	0.020395786567404	0.295876581185208	6.06283490706095	51.1584274088295	4.52627075464506e-11	1.94435351018298e-10
comp60168_c0_seq3	6.26916913059558	0.547505442078872	-3.68560369419202	3.58932701400433	51.1503323369152	4.54428184570636e-11	1.95105660176355e-10
comp60767_c0_seq9	5.96025040982909	0.382379959091989	0.664652624007091	3.75611542765547	51.1419055329786	4.5631071061739e-11	1.95810196943598e-10
comp60703_c2_seq2	-1.53608230858962	-0.685686936534971	0.269888603809642	4.06465127105701	51.1000001414218	4.65788634264589e-11	1.99771569806812e-10
comp57054_c0_seq1	-0.814234530260677	-0.908209208603079	-0.403243775336077	5.77785355268729	51.0906875841788	4.67921468561581e-11	2.00580191653103e-10
comp60574_c0_seq1	-1.26975050655962	-0.164192985699042	-0.312286560437126	4.56307304691002	51.0739684555335	4.71775130997875e-11	2.02125222614629e-10
comp35654_c0_seq1	-0.873313409965936	-0.493731463631972	0.0426914702330834	7.62617031076176	51.0584907168544	4.75370923751569e-11	2.03558199045442e-10
comp56573_c0_seq1	-1.41642540955686	-0.477760817375794	-0.0824154088651186	10.0762714092912	51.0209315759547	4.84210948779703e-11	2.07234105111313e-10
comp66387_c0_seq1	-1.24567929926415	-0.255414082039911	-0.141352133474202	6.3832299467528	50.9807273933565	4.93855622417183e-11	2.11246165766367e-10
comp56345_c0_seq1	-1.83389133010124	-0.407356851314839	0.633277242257694	4.68599886421177	50.9796920942455	4.9410650171852e-11	2.11246165766367e-10
comp55899_c0_seq1	-1.29345840364511	-0.177374448349644	0.242538932576575	5.35945370200848	50.9698932615164	4.96487323971132e-11	2.12043062664952e-10
comp55657_c0_seq2	-1.17275692839428	-0.432157670269069	-0.554062871900909	8.87567247699778	50.9698673879018	4.96493625632962e-11	2.12043062664952e-10
comp56182_c0_seq2	-1.02343068905662	-0.625050554743758	-0.00420793477852788	5.17572810075422	50.9545612785319	5.00235556897608e-11	2.1352866899484e-10
comp54138_c0_seq2	-1.15892939473137	-0.419405565456151	-0.646531192058918	6.98196329214249	50.8807273516847	5.18685621399661e-11	2.21287665635034e-10
comp60775_c0_seq1	-2.63938790332002	0.13739288390711	0.390958461861156	3.8004706218194	50.8670693880668	5.22172346187764e-11	2.22658024102999e-10
comp59326_c0_seq7	3.01266385139511	1.56198094621965	0.924523232356543	4.14914540020283	50.8105655746088	5.36847763696914e-11	2.28795371846855e-10
comp52231_c1_seq3	-1.37441709282541	-0.226834676934786	-0.0258812434560302	5.37171583515598	50.798595859226	5.40009105232824e-11	2.30021744982515e-10
comp60731_c1_seq1	1.37906878505116	0.919947433202811	-0.0951288931135105	4.52187128703899	50.7792319243986	5.45162782837981e-11	2.32095037693523e-10
comp59399_c0_seq1	-0.862018488625106	-0.227554315853668	-0.129532048783142	7.09046412730961	50.7627125799783	5.49598207984818e-11	2.33860528814957e-10
comp56514_c0_seq5	-0.903717415538611	-0.165038326454909	0.0418861241456861	6.6767385097191	50.7451386238934	5.54356387814604e-11	2.35761431250009e-10
comp56236_c0_seq1	-1.68781623816862	-0.772871418872306	-0.223280316168592	3.5936311202998	50.7217532783952	5.6075190397364e-11	2.38356315344013e-10
comp46523_c0_seq1	-4.97141356184277	-0.958926963011474	0.0822875754978065	4.6377246082186	50.6273557987094	5.87326363156028e-11	2.49476112530387e-10
comp60041_c1_seq5	-0.89822136984093	-0.334562360335689	0.00935833132303141	7.81061558696238	50.626573721706	5.87551706541307e-11	2.49476112530387e-10
comp59422_c0_seq2	-2.35306396074612	0.0128749017679836	0.607237506909793	4.06877750598083	50.6255895622638	5.87835399621317e-11	2.49476112530387e-10
comp60217_c1_seq1	-2.05873733416215	0.275987427717376	-0.265224857421101	5.7657761160037	50.6201917079537	5.89393817029295e-11	2.50006608102536e-10
comp35715_c0_seq1	-0.955965813736387	-0.342071353219799	0.0029044194631279	9.83187012020477	50.5930762954793	5.97285002540234e-11	2.5322135097234e-10
comp51338_c0_seq1	-1.3448426135355	-0.389230059837778	0.297298658382407	4.71122019933721	50.5919195942225	5.97623966089808e-11	2.53232612081756e-10
comp50657_c0_seq1	4.10045335009192	0.978591533759511	-1.08969953818486	3.9597732986411	50.5785841173296	6.01545748320142e-11	2.54761224445301e-10
comp59242_c1_seq1	-1.41661430020943	-0.284838266807179	0.324396610354456	5.42682921115399	50.5754207022719	6.02479833111357e-11	2.55023578443899e-10
comp57101_c13_seq3	-1.62358999316349	-0.437944973008064	0.0644204326666297	4.69591388986865	50.5361761955837	6.14189080149703e-11	2.59844294556028e-10
comp60650_c4_seq35	-0.881242924747887	-1.77469135567074	-1.47331518429086	3.83199469389645	50.5067311131485	6.23123580185455e-11	2.63486684454006e-10
comp56739_c1_seq1	-1.96050368226695	-0.0560196559069247	0.528612708792762	4.38172785222323	50.4074997273116	6.54200623574454e-11	2.76483329233291e-10
comp55949_c0_seq1	-1.44741312569422	-0.503930572781082	0.267168695149954	4.48964851951464	50.3873401820129	6.60700962790725e-11	2.79085044522231e-10
comp54649_c0_seq1	-1.14841843622876	-0.455650218654027	-0.107363810232355	4.8788419540078	50.3504914255275	6.72749907280518e-11	2.84026601479994e-10
comp54493_c0_seq1	-2.23771916419968	0.295037241617807	0.344952119404817	4.61475446500897	50.3143841164106	6.84769364095179e-11	2.88950570814967e-10
comp50697_c0_seq1	1.66599141040671	0.5352001996715	0.423117409695459	5.49732880391658	50.3053682879329	6.87803897160258e-11	2.90080041122844e-10
comp61001_c0_seq2	-2.35160451017975	-0.36071309288422	0.724880840866176	3.68348000283424	50.3032556235841	6.88516915410867e-11	2.90229751238715e-10
comp51082_c0_seq1	-1.23408518426782	-0.13021269990104	-0.212900266120597	5.23184288582095	50.2770014386693	6.97439492600369e-11	2.93838073129865e-10
comp50956_c0_seq1	-1.70406938114188	0.0192628318131836	0.0217634194986875	5.15838229144265	50.2517366015361	7.06134909461646e-11	2.97346990966031e-10
comp56856_c2_seq1	-1.29341541856713	-0.196420269044633	-0.038516983940077	5.70205496247661	50.2496835467433	7.06846251831307e-11	2.97491989477911e-10
comp55432_c0_seq2	-1.18160880993617	-0.292987760061364	0.0878207894766439	4.93349725651772	50.2412695098349	7.09769035501491e-11	2.98567088831089e-10
comp49473_c0_seq1	-0.969219424316493	-0.105039397902411	0.000900141088008266	6.08622640310925	50.2272134466285	7.14678652469715e-11	3.00476408553917e-10
comp59925_c0_seq3	5.89536359943333	0.430178362125407	-0.407099108447259	3.40985009398206	50.2121100309705	7.19991925513306e-11	3.02553372120832e-10
comp13946_c0_seq1	-1.00854893286969	-0.375964360939633	-0.779047656330526	5.31825958073833	50.156886546679	7.3975736897851e-11	3.10698094970974e-10
comp36958_c0_seq1	-1.12709713922572	-0.0976315048010079	0.163379937312102	6.15403021425892	50.076017719683	7.6968418090094e-11	3.23099946679597e-10
comp17394_c0_seq1	2.32875595288058	0.209801065960771	-0.0508310362304193	5.41892662461609	50.0670904355463	7.7306113756009e-11	3.24349564237168e-10
comp60693_c3_seq1	-3.12766944707151	1.50995423739147	-1.40413272894684	4.24457543838759	50.0330656099382	7.8606813416865e-11	3.29636228430992e-10
comp54056_c0_seq2	-1.2293957632472	-0.304174462375625	0.0826400515933104	4.92476277433007	50.0315436349366	7.86655036644942e-11	3.2971177492471e-10
comp60854_c5_seq5	1.84051565076228	-0.542468118570522	0.480614099010556	4.53680488433291	50.0200567347343	7.91098749850751e-11	3.31402918154532e-10
comp50915_c0_seq1	-1.39904333584494	-0.318732188919784	0.123876178399715	6.97497318638034	49.983430678725	8.05435738146009e-11	3.37234612262993e-10
comp53177_c0_seq1	-1.20590701273193	-0.599703963839919	0.215428859962135	5.29865799507391	49.9706487050876	8.10500017760786e-11	3.39140527374112e-10
comp61317_c0_seq1	-1.70754750057184	0.12918022021425	-0.985780385068105	4.61320961313343	49.9698324443753	8.10824502900356e-11	3.39140527374112e-10
comp59247_c0_seq1	-1.24328050416272	-0.667084709134299	-0.38905531379095	4.05975673012608	49.9527078943424	8.17661970341415e-11	3.41824029478469e-10
comp47827_c0_seq1	-1.17614626355585	-0.541942393779843	-0.566808707578788	5.83783703524671	49.9360300207572	8.24376464430167e-11	3.44453382508811e-10
comp59098_c3_seq2	2.55664837745464	-1.48146272966695	1.4742196208344	3.88698072362344	49.9198535739112	8.30941715826507e-11	3.47017699561549e-10
comp55521_c0_seq1	-1.66253724662039	0.18577143940015	-0.660356378553952	4.27328425251404	49.9171052093926	8.32062327218415e-11	3.47306757179839e-10
comp61040_c0_seq2	-1.19184535208958	-0.616807667975938	0.0622693050613137	4.60899608349646	49.9071795138962	8.36121995448206e-11	3.48821662125742e-10
comp50256_c0_seq1	-1.84374262802317	0.0520390271573217	0.0155113618091154	6.49715108093385	49.9056769842606	8.36738261389779e-11	3.48899194795553e-10
comp57443_c1_seq1	-1.73537922549685	-0.194951873088355	0.233986475298707	4.88573028002081	49.889358104233	8.43460791809453e-11	3.51521500175189e-10
comp35546_c0_seq1	-1.89512949248092	-0.0979756005549289	0.331390899261094	5.17910070821882	49.8752582140502	8.49312657372619e-11	3.53778437855213e-10
comp51251_c0_seq1	-1.28647310285511	-0.2292063351497	0.229301177428243	5.54230202238065	49.8305221069182	8.68149346098688e-11	3.61439065201642e-10
comp49456_c0_seq1	-1.17172295266924	-0.237263146947364	-0.059915417121884	6.03504805948804	49.808655014076	8.77508079097196e-11	3.65147869053484e-10
comp35942_c0_seq1	-0.899766085651324	-0.627877464493756	0.0763520552107288	5.57133223206683	49.7905617553873	8.8532784373766e-11	3.68212801505258e-10
comp54327_c0_seq1	-1.34408590644943	-0.372043903356076	0.324786258335124	5.21672861019453	49.7849117599531	8.87783965105474e-11	3.69044965186922e-10
comp57194_c3_seq18	-1.22397765736299	0.103289757576003	-0.131644739427682	5.25627777151934	49.7754547160643	8.91910301779125e-11	3.70522357375342e-10
comp54120_c0_seq1	-1.13502057920634	-0.594959845965533	0.0525799418688202	4.59024296629647	49.7746730673438	8.92252210210544e-11	3.70522357375342e-10
comp45808_c0_seq1	-1.3161360660875	-0.265538160589749	-0.236909412094658	7.79865634029382	49.7630224997413	8.97363947794685e-11	3.72454283708332e-10
comp50865_c0_seq1	-1.06601627038506	-0.342351930405882	0.142568565093517	7.62263622371872	49.7149830961272	9.18752382432562e-11	3.8113647963144e-10
comp55850_c0_seq1	-1.99809668916527	-0.436994225142982	-2.49172988309222	4.81684366236522	49.705914546093	9.22846735688901e-11	3.82639163145485e-10
comp35796_c0_seq1	-1.45904699315864	0.246583513499413	0.0126909088930528	8.56821264552682	49.6923960938091	9.28984043137685e-11	3.8498694548436e-10
comp55782_c0_seq1	2.25052591882959	-0.0743472857547141	-0.29109255633148	4.65959678325495	49.6824761901463	9.33513556791602e-11	3.86666371556092e-10
comp57460_c2_seq2	-0.889581741010378	-0.124088226866869	-0.411202938928696	5.80519538060087	49.6366418633152	9.54730129989367e-11	3.95252422558417e-10
comp56907_c0_seq4	-0.931822884958704	-0.309001931631975	-0.213388494685296	7.99299435622422	49.6218629479546	9.61673450478557e-11	3.97923685021908e-10
comp58409_c1_seq4	1.68555367086193	-0.142222842126784	-0.308843910705375	7.51525003764654	49.6069006905526	9.68754307545374e-11	4.00649102906265e-10
comp57919_c2_seq1	-0.937418595637386	-0.198277968320054	-0.0531984091833165	6.57992401159519	49.5892351454373	9.77181583938357e-11	4.03928297776865e-10
comp50880_c0_seq1	-2.364472631112	-0.193351611079736	0.125101418703715	3.88743433963777	49.5199267068075	1.01095837640717e-10	4.17677298631829e-10
comp35923_c0_seq1	-1.31903216269983	-0.0811654831637118	-0.724695224959226	5.9907608362702	49.5183461642531	1.01174209283418e-10	4.17788151019553e-10
comp56133_c0_seq2	-1.32001068431576	-0.521911009805077	-0.285184245068686	4.9901622202922	49.5115201195699	1.01513378458916e-10	4.18975277896117e-10
comp61153_c1_seq1	-2.2197877755185	-0.426179451166807	0.696996007605788	3.72197796268592	49.4986887151944	1.02154017092584e-10	4.2140481554834e-10
comp19634_c0_seq1	-1.41164814498759	-0.488404930746357	0.454612078718993	6.27118595445796	49.4908021180126	1.0254977730778e-10	4.22822225257815e-10
comp45039_c0_seq1	-1.36272084902068	-0.0592057387929507	0.104846882081822	8.44377775334922	49.4758755152958	1.03303013201348e-10	4.25711349776372e-10
comp57823_c1_seq3	-1.55718344740594	0.0170536864041562	0.200011133695052	4.96691657121992	49.4678557684092	1.03709991284427e-10	4.27171336052626e-10
comp61208_c0_seq1	-1.75063177810714	0.0568033295643638	0.331603563545811	4.36715544305991	49.466528538182	1.03777498574357e-10	4.27232302409214e-10
comp54511_c0_seq1	-1.46017817707625	-0.126284516137047	0.0221667768815778	4.64526856669055	49.3844332214514	1.08039625093185e-10	4.44552893911349e-10
comp59370_c0_seq1	-1.90628417566703	-0.29093457538124	0.582649635757118	4.24492348211188	49.373045987691	1.08644466894137e-10	4.46814839494611e-10
comp35945_c0_seq1	-0.800601931071499	-0.463896819741202	-1.01733089311686	6.39176107656801	49.3152001894449	1.11769638961088e-10	4.59434428711245e-10
comp56905_c0_seq2	-1.44578403737959	-0.292684704373895	0.292001299786465	5.41286591636136	49.3021883665439	1.12484898696597e-10	4.62140186941011e-10
comp47362_c0_seq1	-1.22602260077191	-0.238854562123484	0.146819170308676	5.4105245902799	49.2912980560651	1.1308705353444e-10	4.64378751747809e-10
comp14172_c0_seq1	-1.20095507592735	-0.302723097596544	0.164598010578716	5.04818295775151	49.275656616064	1.13957550785266e-10	4.67716408438161e-10
comp51027_c0_seq1	-1.28225849268544	-0.272338691345496	-0.24821087560974	4.78771932909877	49.2490655961793	1.15452821896998e-10	4.73613650960052e-10
comp35456_c0_seq1	-1.45815283615701	-0.186562223687877	0.565076418840075	5.10899619578137	49.2430043564322	1.15796393055564e-10	4.74782783059383e-10
comp57838_c0_seq1	-1.19887145689036	-0.187294466526966	0.1839195763229	5.00319154293452	49.1639798093214	1.20370376461029e-10	4.93287296053136e-10
comp61469_c8_seq10	-1.89685345612967	-0.213482852574673	-0.771918524639022	5.69788935535413	49.1456604804047	1.21456228281282e-10	4.97485693000543e-10
comp59415_c0_seq1	-7.306356172052	-0.454677120873427	-0.329635258433209	4.46499281615192	49.1341735904201	1.22142084221565e-10	5.00042290252529e-10
comp59846_c1_seq3	-1.68005473036772	-0.0128834115427931	0.0318526252340919	4.54106250974914	49.0735831495842	1.25824359840602e-10	5.14857274542111e-10
comp61401_c0_seq2	-0.805582260700638	-0.35405444279877	0.0790927106880269	7.17921321390807	49.0465809456111	1.27500904473213e-10	5.21454254116985e-10
comp35822_c0_seq1	-1.27618924616807	-0.404262331868866	0.0596215486586369	5.03997722639389	49.0428785995909	1.27732513536584e-10	5.22138050795535e-10
comp54195_c1_seq3	-1.29657803640382	-0.190524989173793	-0.0655547659014911	5.30725021920712	49.0399239119589	1.27917652632339e-10	5.22631296490796e-10
comp35933_c0_seq1	-0.935770931008981	0.0742073231550121	-0.0949273825536509	6.38409376025057	49.0353973368535	1.28201805504294e-10	5.23528380563127e-10
comp58325_c0_seq1	-0.869061595904927	-0.215994473412719	-0.458011726661277	7.57231886477626	49.0201451017801	1.29163905893124e-10	5.27191652149882e-10
comp58113_c0_seq2	-1.09134928586098	-0.41178373254626	0.0537729369100576	5.12133359579058	49.0081274387899	1.29927050661718e-10	5.30039593690935e-10
comp60473_c7_seq1	-1.36025756749712	0.159004018485017	0.349041035322822	5.66613891265259	48.9880365869477	1.31212933460157e-10	5.35016116010076e-10
comp56150_c1_seq2	-1.80696137877431	0.069668241503626	-0.148501142656099	4.4468099077217	48.9813609704066	1.31643003979597e-10	5.36499844272806e-10
comp54544_c9_seq1	-0.669517119335863	-0.322580280023027	-0.420179901906539	6.669315671738	48.9052742222104	1.36645474302338e-10	5.56385810612814e-10
comp58795_c4_seq3	-1.64929098909004	0.357944093906461	0.48401067978169	5.21353472202626	48.9050607015795	1.36659776576624e-10	5.56385810612814e-10
comp52237_c0_seq1	-1.04763006974294	-0.460849628037473	0.188685682058552	5.82581944144565	48.8877492612673	1.3782434121527e-10	5.60845436692258e-10
comp60370_c0_seq22	1.34536532702279	0.480370532859111	0.126134185219635	6.38258634726837	48.877693083389	1.38505381975744e-10	5.63333982084987e-10
comp45864_c1_seq2	-1.19905088232215	-0.439162017391515	-0.0342473383776123	5.29570882314381	48.8512410128555	1.40312910483408e-10	5.70399424462642e-10
comp61365_c0_seq2	7.54121245229473	-0.400733912200168	-0.816835022683313	4.24454600006581	48.837693530331	1.41247747382352e-10	5.739118998904e-10
comp50707_c0_seq1	-1.30498849531564	-0.127477523538002	-0.198941447839381	4.68235872489187	48.8363228917279	1.4134267355468e-10	5.74009875668457e-10
comp57461_c0_seq1	-1.73307838021516	-0.316628154249168	0.345350604694226	4.10773369412257	48.8314133389645	1.41683217324127e-10	5.75104736920067e-10
comp58675_c4_seq1	-1.46576287686373	-0.468373620764176	0.34538504714627	4.18734621022669	48.7487743861489	1.475399586721e-10	5.98578030528549e-10
comp56210_c0_seq1	-1.27521630882767	-0.13308479293628	0.306753842402986	5.26196591113194	48.738806317077	1.48262564725831e-10	6.01208779223406e-10
[truncated: 6,107 more rows]
